# Supplementary material for: Epimeric and amino disaccharide analogs as probes of an α-(1→6)-mannosyltransferase involved in mycobacterial lipoarabinomannanbiosynthesis
Source: Royal Society of Chemistry journal article supplement (doi:10.1039/b916580k), 2009-11-16

## Supporting Information for

# Epimeric and amino disaccharide analogs as probes of an $\alpha$ -(1→6)-mannosyltransferase involved in mycobacterial lipoarabinomannan biosynthesis.

Pui Hang Tam and Todd L Lowary

Alberta Ingenuity Centre for Carbohydrate Science and Department of Chemistry, The University of Alberta, Gunning-Lemieux Chemistry Centre, Edmonton, AB T6G 2G2, Canada

Email: [tlowary@ualberta.ca](mailto:tlowary@ualberta.ca)

### Table of Contents

|                                                            |     |
|------------------------------------------------------------|-----|
| <b>Figure S1.</b>                                          | S4  |
| Additional experimental details and data for new compounds | S6  |
| References for Supporting Information                      | S33 |
| <sup>1</sup> H NMR spectrum of <b>2</b>                    | S34 |
| <sup>13</sup> C NMR spectrum (APT) of <b>2</b>             | S35 |
| <sup>1</sup> H NMR spectrum of <b>3</b>                    | S36 |
| <sup>13</sup> C NMR spectrum (APT) of <b>3</b>             | S37 |
| <sup>1</sup> H NMR spectrum of <b>4</b>                    | S38 |
| <sup>13</sup> C NMR spectrum (APT) of <b>4</b>             | S39 |
| <sup>1</sup> H NMR spectrum of <b>5</b>                    | S40 |
| <sup>13</sup> C NMR spectrum (APT) of <b>5</b>             | S41 |

|                                                 |     |
|-------------------------------------------------|-----|
| $^1\text{H}$ NMR spectrum of <b>6</b>           | S42 |
| $^{13}\text{C}$ NMR spectrum (APT) of <b>6</b>  | S43 |
| $^1\text{H}$ NMR spectrum of <b>7</b>           | S44 |
| $^{13}\text{C}$ NMR spectrum (APT) of <b>7</b>  | S45 |
| $^1\text{H}$ NMR spectrum of <b>8</b>           | S46 |
| $^{13}\text{C}$ NMR spectrum (APT) of <b>8</b>  | S47 |
| $^1\text{H}$ NMR spectrum of <b>9</b>           | S48 |
| $^{13}\text{C}$ NMR spectrum (APT) of <b>9</b>  | S49 |
| $^1\text{H}$ NMR spectrum of <b>13</b>          | S50 |
| $^{13}\text{C}$ NMR spectrum (APT) of <b>13</b> | S51 |
| $^1\text{H}$ NMR spectrum of <b>14</b>          | S52 |
| $^{13}\text{C}$ NMR spectrum (APT) of <b>14</b> | S53 |
| $^1\text{H}$ NMR spectrum of <b>15</b>          | S54 |
| $^{13}\text{C}$ NMR spectrum (APT) of <b>15</b> | S55 |
| $^1\text{H}$ NMR spectrum of <b>18</b>          | S56 |
| $^{13}\text{C}$ NMR spectrum (APT) of <b>18</b> | S57 |
| $^1\text{H}$ NMR spectrum of <b>19</b>          | S58 |
| $^{13}\text{C}$ NMR spectrum (APT) of <b>19</b> | S59 |
| $^1\text{H}$ NMR spectrum of <b>20</b>          | S60 |
| $^{13}\text{C}$ NMR spectrum (APT) of <b>20</b> | S61 |
| $^1\text{H}$ NMR spectrum of <b>21</b>          | S62 |
| $^1\text{H}$ NMR spectrum of <b>22</b>          | S63 |
| $^1\text{H}$ NMR spectrum of <b>23</b>          | S64 |
| $^{13}\text{C}$ NMR spectrum (APT) of <b>23</b> | S65 |
| $^1\text{H}$ NMR spectrum of <b>26</b>          | S66 |
| $^{13}\text{C}$ NMR spectrum (APT) of <b>26</b> | S67 |
| $^1\text{H}$ NMR spectrum of <b>27</b>          | S68 |
| $^{13}\text{C}$ NMR spectrum (APT) of <b>27</b> | S69 |
| $^1\text{H}$ NMR spectrum of <b>28</b>          | S70 |
| $^{13}\text{C}$ NMR spectrum (APT) of <b>28</b> | S71 |
| $^1\text{H}$ NMR spectrum of <b>29</b>          | S72 |

|                                                 |     |
|-------------------------------------------------|-----|
| <sup>13</sup> C NMR spectrum (APT) of <b>29</b> | S73 |
| <sup>1</sup> H NMR spectrum of <b>30</b>        | S74 |
| <sup>13</sup> C NMR spectrum (APT) of <b>30</b> | S75 |
| <sup>19</sup> F NMR spectrum of <b>30</b>       | S76 |
| <sup>1</sup> H NMR spectrum of <b>31</b>        | S77 |
| <sup>13</sup> C NMR spectrum (APT) of <b>31</b> | S78 |
| <sup>1</sup> H NMR spectrum of <b>32</b>        | S79 |
| <sup>13</sup> C NMR spectrum (APT) of <b>32</b> | S80 |
| <sup>1</sup> H NMR spectrum of <b>33</b>        | S81 |
| <sup>13</sup> C NMR spectrum (APT) of <b>33</b> | S82 |
| <sup>1</sup> H NMR spectrum of <b>34</b>        | S83 |
| <sup>13</sup> C NMR spectrum (APT) of <b>34</b> | S84 |
| <sup>19</sup> F NMR spectrum of <b>34</b>       | S85 |
| <sup>1</sup> H NMR spectrum of <b>35</b>        | S86 |
| <sup>13</sup> C NMR spectrum (APT) of <b>35</b> | S87 |
| <sup>1</sup> H NMR spectrum of <b>36</b>        | S88 |
| <sup>13</sup> C NMR spectrum (APT) of <b>36</b> | S89 |
| <sup>1</sup> H NMR spectrum of <b>37</b>        | S90 |
| <sup>13</sup> C NMR spectrum (APT) of <b>37</b> | S91 |
| <sup>1</sup> H NMR spectrum of <b>38</b>        | S92 |
| <sup>13</sup> C NMR spectrum (APT) of <b>38</b> | S93 |
| <sup>1</sup> H NMR spectrum of <b>39</b>        | S94 |
| <sup>13</sup> C NMR spectrum (APT) of <b>39</b> | S95 |
| <sup>1</sup> H NMR spectrum of <b>40</b>        | S96 |
| <sup>13</sup> C NMR spectrum (APT) of <b>40</b> | S97 |

**Figure S1.** MALDI mass spectra of enzymatic products isolated from incubation mixtures using analogs **3** (A), **5** (B), **7** (C), and **9** (D) at 2 mM concentrations.

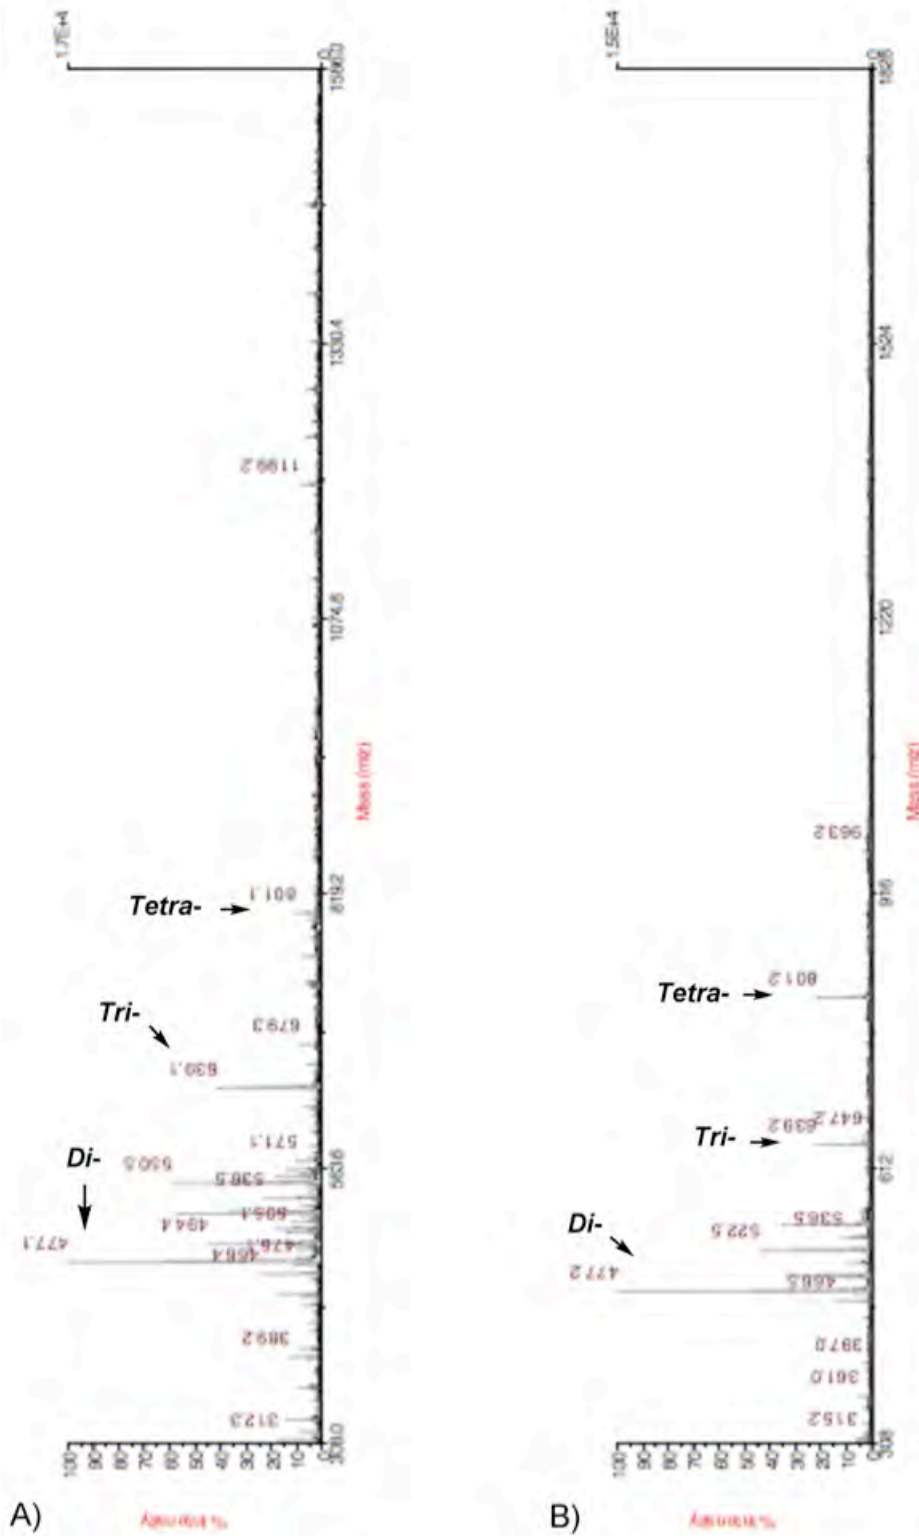



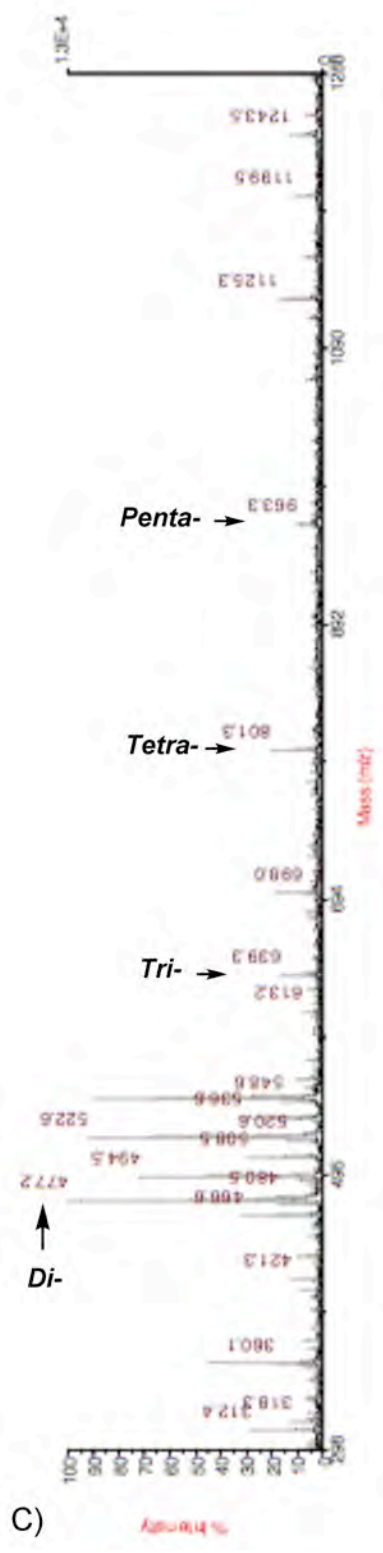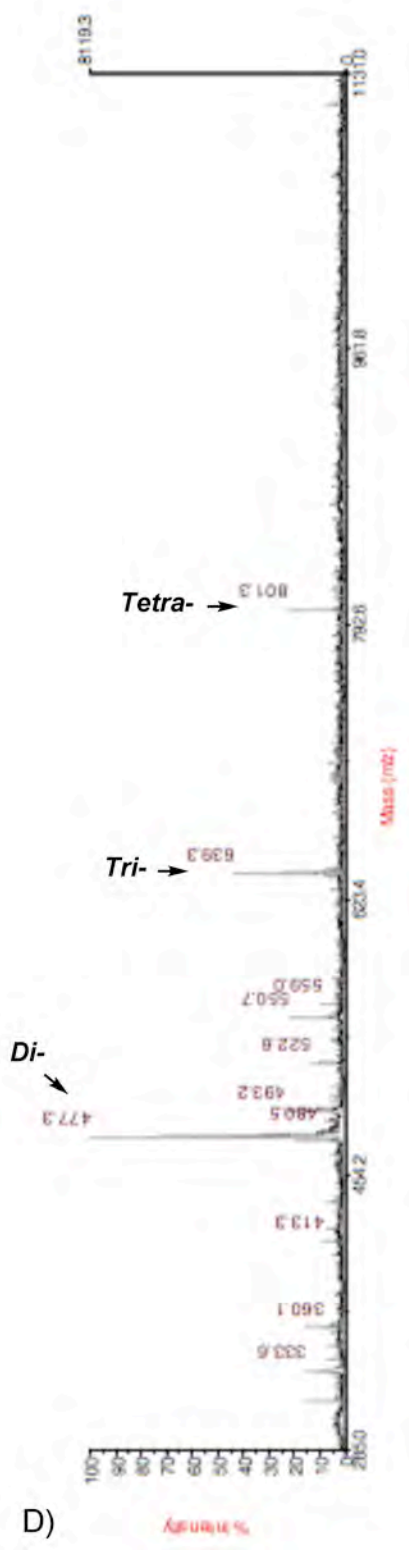

**Phenyl 2-O-acetyl-6-O-(*tert*-butyldiphenylsilyl)-3,4-O-isopropylidene-1-thio- $\alpha$ -D-talopyranoside (13)**

Monosaccharide **20** (102 mg, 0.086 mmol) was dissolved in 1:1 CH<sub>2</sub>Cl<sub>2</sub>–pyridine (4 mL) and acetic anhydride (0.16 mL) was added. The reaction mixture was stirred for 4 h and then diluted with CH<sub>2</sub>Cl<sub>2</sub> (25 mL) before being washed with 1 M HCl (3 x 10 mL), satd aq NaHCO<sub>3</sub> (10 mL) and H<sub>2</sub>O (10 mL). The organic layer was dried (MgSO<sub>4</sub>), concentrated and the crude product was purified by chromatography (6:1 hexane–EtOAc) to give **13** (98 mg, 89%) as colorless oil: *R*<sub>f</sub> 0.40 (6:1 hexane–EtOAc); [ $\alpha$ ]<sub>D</sub> = +77.0 (*c* 2.8, CH<sub>2</sub>Cl<sub>2</sub>); <sup>1</sup>H NMR (600 MHz, CDCl<sub>3</sub>)  $\delta$ <sub>H</sub> 7.68–7.73 (m, 4H, ArH), 7.50–7.54 (m, 2H, ArH), 7.35–7.45 (m, 6H, ArH), 7.21–7.26 (m, 3H, ArH), 5.45 (d, 1H, *J* = 8.6 Hz, H-1), 5.08 (dd, 1H, *J* = 8.6, 2.9 Hz, H-2), 4.60 (dd, 1H, *J* = 7.6, 2.9 Hz, H-3), 4.39 (dd, 1H, *J* = 7.6, 1.9 Hz, H-4), 3.93 (ddd, 1H, *J* = 6.5, 6.2, 1.9 Hz, H-5), 3.84 (dd, 1H, *J* = 10.4, 6.2 Hz, H-6a), 3.77 (dd, 1H, *J* = 10.4, 6.5 Hz, H-6b), 2.19 (s, 3H, C(O)CH<sub>3</sub>), 1.44 (s, 3H, C(CH<sub>3</sub>)<sub>2</sub>), 1.33 (s, 3H, C(CH<sub>3</sub>)<sub>2</sub>), 1.05 (s, 9H, C(CH<sub>3</sub>)<sub>3</sub>); <sup>13</sup>C NMR (125 MHz, CDCl<sub>3</sub>)  $\delta$ <sub>C</sub> 170.2 (C=O), 135.7 (2C, Ar), 135.6 (2C, Ar), 133.5 (Ar), 133.4 (2C, Ar), 132.7 (2C, Ar), 129.6 (2C, Ar), 128.8 (2C, Ar), 127.7 (2C, Ar), 127.6 (3C, Ar), 110.8 (C(CH<sub>3</sub>)<sub>2</sub>), 83.8 (C-1), 73.7 (C-4), 75.6 (C-3), 71.5 (C-5), 69.1 (C-2), 62.4 (C-6), 26.8 (C(CH<sub>3</sub>)<sub>3</sub>), 26.1 (C(CH<sub>3</sub>)<sub>2</sub>), 25.5 (C(CH<sub>3</sub>)<sub>2</sub>), 21.1 (C(O)CH<sub>3</sub>), 19.2 (C(CH<sub>3</sub>)<sub>3</sub>). HRMS (ESI) calcd. for (M + Na) C<sub>33</sub>H<sub>40</sub>O<sub>6</sub>SiS: 615.2207. Found: 615.2207.

**Octyl 2-O-acetyl-3,4-O-isopropylidene- $\alpha$ -D-talopyranoside (14)**

Octyl talopyranoside **23** (112 mg, 0.18 mmol) was dissolved in THF (5 mL) and 1.0 M tetra-*n*-butylammonium fluoride in THF (0.9 mL, 0.90 mmol) was added and the solution

was stirred at rt overnight. The solvent was evaporated and the residue was purified by chromatography (2:1 hexane–EtOAc) to give **14** (51 mg, 74%) as a colorless oil.  $R_f$  0.11 (2:1 hexane–EtOAc);  $[\alpha]_D = +87.8$  ( $c$  1.7,  $\text{CH}_2\text{Cl}_2$ );  $^1\text{H NMR}$  (400 MHz,  $\text{CDCl}_3$ )  $\delta_{\text{H}}$  4.88–4.95 (m, 2H, H-1, H-2), 4.59 (dd, 1H,  $J = 7.5, 2.5$  Hz, H-3), 4.35 (dd, 1H,  $J = 7.5, 1.8$  Hz, H-4), 3.70–3.90 (m, 4H, H-5, H-6a, H-6b, octyl  $\text{OCH}_2$ ), 3.45 (dt, 1H,  $J = 9.7, 6.6$  Hz, octyl  $\text{OCH}_2$ ), 2.16 (s, 3H,  $\text{C}(\text{O})\text{CH}_3$ ), 2.08 (br s, 1H, OH), 1.48–1.62 (m, 5H,  $\text{C}(\text{CH}_3)_2$ , octyl  $\text{OCH}_2\text{CH}_2$ ), 1.20–1.39 (m, 13H,  $\text{C}(\text{CH}_3)_2$ , octyl  $\text{CH}_2$ ), 0.87 (t, 3H,  $J = 6.7$  Hz, octyl  $\text{CH}_3$ );  $^{13}\text{C NMR}$  (125 MHz,  $\text{CDCl}_3$ )  $\delta_{\text{C}}$  170.2 (C=O), 110.8 ( $\text{C}(\text{CH}_3)_2$ ), 97.6 (C-1,  $^1J_{\text{C,H}} = 171.9$  Hz), 74.6 (C-4), 72.2 (C-3), 70.5 (C-2), 69.8 (C-5), 68.2 (octyl  $\text{OCH}_2$ ), 62.2 (C-6), 31.8 (octyl  $\text{CH}_2$ ), 29.5 (octyl  $\text{CH}_2$ ), 29.3(1) (octyl  $\text{CH}_2$ ), 29.2(6) (octyl  $\text{CH}_2$ ), 26.0(3) ( $\text{C}(\text{CH}_3)_2$ ), 26.0(0) (octyl  $\text{CH}_2$ ), 25.2 ( $\text{C}(\text{CH}_3)_2$ ), 22.6 (octyl  $\text{CH}_2$ ), 21.1 ( $\text{C}(\text{O})\text{CH}_3$ ), 14.1 (octyl  $\text{CH}_3$ ). Anal. Calcd for  $\text{C}_{19}\text{H}_{34}\text{O}_7$  (422.27): C, 68.22; H, 9.06. Found: C, 68.28; H, 9.06. HRMS (ESI) calcd. for (M + Na)  $\text{C}_{19}\text{H}_{34}\text{O}_7$ : 397.2197. Found: 397.2198.

***p*-Tolyl 2,3,4-tri-*O*-benzyl-6-*O*-*tert*-butyldiphenylsilyl-1-thio- $\beta$ -D-glucopyranoside (15)**

Tetraol **24**<sup>1</sup> (1.50 g, 5.24 mmol) and imidazole (0.90 g, 13.1 mmol) were dissolved in DMF (15 mL) and *tert*-butylchlorodiphenylsilane (1.7 mL, 6.55 mmol) was added. The reaction mixture was heated at 45 °C for 5 h and was quenched by the addition of  $\text{H}_2\text{O}$  (2 mL). The mixture was then diluted with EtOAc (60 mL), washed with  $\text{H}_2\text{O}$  (3 x 20 mL), 1M HCl (20 mL) and satd aq  $\text{NaHCO}_3$  (20 mL). The organic layer was dried ( $\text{MgSO}_4$ ), concentrated and the resulting oil was dissolved in DMF (4.5 mL) and BnBr (1.0 mL, 8.6 mmol) was added. The solution was cooled in an ice bath and 60% NaH in mineral oil

(0.30 g, 7.64 mmol) was added portion wise, and the mixture was warmed to rt. After 3 h, the reaction was quenched by the addition of CH<sub>3</sub>OH (15 mL), diluted with EtOAc (90 mL), washed with H<sub>2</sub>O (3 x 40 mL), brine (40 mL) and dried (MgSO<sub>4</sub>), filtered and concentrated to pale yellow oil, was purified by chromatography (9:1 hexane–EtOAc) to give **15** (1.43 g, 95%) as a colorless oil: *R*<sub>f</sub> 0.33 (9:1 hexane–EtOAc); [ $\alpha$ ]<sub>D</sub> = –14.4 (*c* 1.8, CH<sub>2</sub>Cl<sub>2</sub>); <sup>1</sup>H NMR (600 MHz, CDCl<sub>3</sub>)  $\delta$ <sub>H</sub> 7.77–7.81 (m, 2H, ArH), 7.70–7.74 (m, 2H, ArH), 7.50–7.54 (m, 2H, ArH), 7.39–7.45 (m, 4H, ArH), 7.24–7.38 (m, 15H, ArH), 7.13–7.17 (m, 2H, ArH), 7.70–7.04 (m, 2H, ArH), 4.85–4.92 (m, 4H, PhCH<sub>2</sub>), 4.74 (d, 1H, *J* = 10.2 Hz, PhCH<sub>2</sub>), 4.70 (d, 1H, *J* = 10.8 Hz, PhCH<sub>2</sub>), 4.63 (d, 1H, *J* = 9.8 Hz, H-1), 4.00 (dd, 1H, *J* = 11.4, 1.8 Hz, H-6a), 3.95 (dd, 1H, *J* = 11.4, 3.7 Hz, H-6b), 3.80 (dd, 1H, *J* = 8.9, 8.9 Hz, H-4), 3.72 (dd, 1H, *J* = 8.9, 8.9 Hz, H-3), 3.53 (dd, 1H, *J* = 9.8, 8.9 Hz, H-2), 3.38 (ddd, 1H, *J* = 8.9, 3.7, 1.8 Hz, H-5), 2.31 (s, 3H, CH<sub>3</sub>), 1.11 (s, 9H, C(CH<sub>3</sub>)<sub>3</sub>); <sup>13</sup>C NMR (125 MHz, CDCl<sub>3</sub>)  $\delta$ <sub>C</sub> 138.4 (Ar), 138.3 (Ar), 138.1 (Ar), 137.5 (Ar), 135.9 (2C Ar), 135.7 (2C, Ar), 133.5 (Ar), 133.0 (Ar), 132.4 (2C, Ar), 130.2 (Ar), 129.7, 129.6, 128.5, 128.4, 128.2, 128.0, 127.9, 127.7(9), 127.7(5), 127.7(3), 127.6(8) (23 x Ar), 87.8 (C-1), 86.9 (C-3), 80.8 (C-2), 80.0 (C-5), 77.5 (C-4), 76.0 (PhCH<sub>2</sub>), 75.3 (PhCH<sub>2</sub>), 75.1 (PhCH<sub>2</sub>), 62.7 (C-6), 26.9 (C(CH<sub>3</sub>)<sub>3</sub>), 21.1 (CH<sub>3</sub>), 19.3 (C(CH<sub>3</sub>)<sub>3</sub>). HRMS (ESI) calcd. for (M + Na) C<sub>50</sub>H<sub>54</sub>O<sub>5</sub>SiS: 817.3354. Found: 817.3356.

### **Phenyl 6-*O*-*tert*-butyldiphenylsilyl-1-thio- $\beta$ -D-galactopyranoside (18)**

Tetraol **17**<sup>2</sup> (2.68 g, 9.85 mmol) and imidazole (1.68 g, 24.6 mmol) were dissolved in DMF (6 mL) and *tert*-butylchlorodiphenylsilane (3.2 mL, 12.3 mmol) was added. The reaction mixture was heated at 45 °C for 3 h and was quenched by the addition of H<sub>2</sub>O

(2 mL). The mixture was then diluted with EtOAc (100 mL), washed with H<sub>2</sub>O (3 x 30 mL), 1M HCl (30 mL) and satd aq NaHCO<sub>3</sub> (30 mL). The organic layer was dried (MgSO<sub>4</sub>), concentrated, and the crude product was purified by chromatography (1:1 hexane–EtOAc) to give **18** (4.73 g, 94%) as a colorless oil: *R*<sub>f</sub> 0.35 (1:1 hexane–EtOAc); [α]<sub>D</sub> = –19.0 (*c* 1.2, CH<sub>2</sub>Cl<sub>2</sub>); <sup>1</sup>H NMR (500 MHz, CDCl<sub>3</sub>) δ<sub>H</sub> 7.67–7.75 (m, 4H, ArH), 7.53–7.57 (m, 2H, ArH), 7.35–7.47 (m, 6H, ArH), 7.23–7.29 (m, 3H, ArH), 4.50 (d, 1H, *J* = 9.7 Hz, H-1), 4.09 (m, 1H, H-4), 3.92–4.00 (m, 2H, H-6a, H-6b), 3.68 (ddd, 1H, *J* = 9.7, 9.7, 1.7 Hz, H-2), 3.55–3.62 (m, 2H, H-3, H-5), 2.96 (d, 1H, *J* = 6.4 Hz, OH), 2.94 (d, 1H, *J* = 3.7 Hz, OH), 2.73 (d, 1H, *J* = 1.7 Hz, OH), 1.07 (s, 9H, C(CH<sub>3</sub>)<sub>3</sub>); <sup>13</sup>C NMR (125 MHz, CDCl<sub>3</sub>) δ<sub>C</sub> 135.7 (2C, Ar), 135.6 (2C, Ar), 132.9 (Ar), 132.7 (Ar), 132.6 (Ar), 132.2 (2C, Ar), 129.9 (2C, Ar), 129.0 (2C, Ar), 127.8 (5C, Ar), 88.6 (C-1), 78.2 (C-5), 75.0 (C-3), 70.0 (C-2), 69.4 (C-4), 63.8 (C-6), 31.8 (octyl CH<sub>2</sub>), 26.8 (C(CH<sub>3</sub>)<sub>3</sub>), 19.2 (C(CH<sub>3</sub>)<sub>3</sub>). HRMS (ESI) calcd. for (M + Na) C<sub>28</sub>H<sub>34</sub>O<sub>5</sub>SiS: 553.1789. Found: 553.1785.

**Phenyl**                      **6-*O*-*tert*-butyldiphenylsilyl-3,4-*O*-isopropylidene-1-thio-β-D-galactopyranoside (19)**

Triol **18** (3.37 g, 6.60 mmol), 2,2-dimethoxypropane (6.5 mL, 52.8 mmol), and *p*-TsOH (25 mg) were dissolved in acetone (90 mL) and the mixture was stirred for 2 h. The reaction mixture was neutralized with triethylamine, concentrated, and purified by chromatography (4:1 hexane–EtOAc) to give **19** (3.70 g, quant.) as white foam: *R*<sub>f</sub> 0.30 (4:1 hexane–EtOAc); [α]<sub>D</sub> = –2.3 (*c* 1.3, CH<sub>2</sub>Cl<sub>2</sub>); <sup>1</sup>H NMR (500 MHz, CDCl<sub>3</sub>) δ<sub>H</sub> 7.69–7.74 (m, 4H, ArH), 7.52–7.56 (m, 2H, ArH), 7.35–7.46 (m, 6H, ArH), 7.24–7.29 (m, 3H, ArH), 4.43 (d, 1H, *J* = 10.3 Hz, H-1), 4.27 (dd, 1H, *J* = 5.5, 2.0 Hz, H-4), 4.07 (dd, 1H, *J*

= 6.9, 5.5 Hz, H-3), 3.89–4.01 (m, 3H, H-5, H-6a, H-6b), 3.55 (dd, 1H,  $J = 10.3, 6.9, 2.3$  Hz, H-2), 2.41 (d, 1H,  $J = 2.3$  Hz, *OH*), 1.41 (s, 3H, C(CH<sub>3</sub>)<sub>2</sub>), 1.33 (s, 3H, C(CH<sub>3</sub>)<sub>2</sub>), 1.06 (s, 9H, C(CH<sub>3</sub>)<sub>3</sub>); <sup>13</sup>C NMR (125 MHz, CDCl<sub>3</sub>) δ<sub>C</sub> 135.6(4) (2C, Ar), 135.6(2) (2C, Ar), 133.4 (Ar), 133.3 (Ar), 132.4 (2C, Ar), 132.3 (Ar), 129.7(1) (Ar), 129.7(0) (Ar), 129.0 (2C, Ar), 127.9 (Ar), 127.7 (2C, Ar), 127.6 (2C, Ar), 110.1 (C(CH<sub>3</sub>)<sub>2</sub>), 88.3 (C-1), 79.0 (C-3), 77.2 (C-5), 73.3 (C-4), 71.6 (C-2), 63.0 (C-6), 28.1 (C(CH<sub>3</sub>)<sub>2</sub>), 26.8 (C(CH<sub>3</sub>)<sub>3</sub>), 26.3 (C(CH<sub>3</sub>)<sub>2</sub>), 19.2 (C(CH<sub>3</sub>)<sub>3</sub>). HRMS (ESI) calcd. for (M + Na) C<sub>31</sub>H<sub>38</sub>O<sub>5</sub>SiS: 573.2102. Found: 573.2105.

**Phenyl 6-*O*-*tert*-butyldiphenylsilyl-3,4-*O*-isopropylidene-1-thio- $\alpha$ -D-talopyranoside (20)**

Oxalyl chloride (350  $\mu$ L, 0.69 mmol) was dissolved in CH<sub>2</sub>Cl<sub>2</sub> (3.5 mL) and DMSO (110  $\mu$ L, 1.52 mmol) was added dropwise at  $-78$  °C. After stirring for 30 min, alcohol **19** (253 mg, 0.46 mmol) in CH<sub>2</sub>Cl<sub>2</sub> (3.5 mL) was added dropwise to the mixture over 10 min. After being stirred for 20 min, the solution was then warmed to  $-60$  °C and triethylamine (0.43 mL, 3.1 mmol) was added slowly as the solution warmed to rt over 40 min. The reaction was quenched by the addition H<sub>2</sub>O and the organic layer was washed with H<sub>2</sub>O (5 mL) and brine (5 mL). The organic layer was dried (MgSO<sub>4</sub>), concentrated, and the crude ketone intermediate was redissolved in MeOH (17 mL). Sodium borohydride (35 mg, 0.92 mmol) was then added and the mixture was stirred for 20 min before being neutralized with AcOH. The solution was concentrated and the crude product was purified by chromatography (3:1 hexane–EtOAc) to give  $\alpha$ -glycoside **20** (135 mg, 53%) and its  $\beta$ -glycoside isomer (23 mg, 9%) as a colorless oils;  $\alpha$ -glycoside **20**,  $R_f$  0.32;  $\beta$ -

glycoside,  $R_f$  0.46 (3:1 hexane–EtOAc); Only the  $\alpha$ -glycoside was fully characterized:  $[\alpha]_D = +107.9$  (c 0.8,  $\text{CH}_2\text{Cl}_2$ );  $^1\text{H}$  NMR (500 MHz,  $\text{CDCl}_3$ )  $\delta_{\text{H}}$  7.69–7.74 (m, 4H, ArH), 7.53–7.57 (m, 2H, ArH), 7.34–7.46 (m, 6H, ArH), 7.21–7.29 (m, 3H, ArH), 5.33 (d, 1H,  $J = 7.4$  Hz, H-1), 4.55 (dd, 1H,  $J = 7.5, 3.4$  Hz, H-3), 4.35 (dd, 1H,  $J = 7.5, 2.0$  Hz, H-4), 3.97 (ddd, 1H,  $J = 6.6, 6.0, 2.0$  Hz, H-5), 3.85 (dd, 1H,  $J = 10.3, 6.0$  Hz, H-6a), 3.80 (dd, 1H,  $J = 10.3, 6.6$  Hz, H-6b), 3.75 (ddd, 1H,  $J = 7.4, 7.2, 3.4$  Hz, H-2), 2.50 (d, 1H,  $J = 7.2$  Hz, OH), 1.45 (s, 3H,  $\text{C}(\text{CH}_3)_2$ ), 1.35 (s, 3H,  $\text{C}(\text{CH}_3)_2$ ), 1.06 (s, 9H,  $\text{C}(\text{CH}_3)_3$ );  $^{13}\text{C}$  NMR (125 MHz,  $\text{CDCl}_3$ )  $\delta_{\text{C}}$  135.7 (2C, Ar), 135.6 (2C, Ar), 133.5 (Ar), 133.4 (2C, Ar), 132.6 (2C, Ar), 129.7 (2C, Ar), 128.9 (2C, Ar), 127.7 (Ar), 127.6(4) (2C, Ar), 127.6(0) (2C, Ar), 110.3 ( $\text{C}(\text{CH}_3)_2$ ), 87.2 (C-1), 73.3 (2C, C-3, C-4), 70.8 (C-5), 68.3 (C-2), 62.7 (C-6), 26.8 ( $\text{C}(\text{CH}_3)_3$ ), 26.0 ( $\text{C}(\text{CH}_3)_2$ ), 25.3 ( $\text{C}(\text{CH}_3)_2$ ), 19.2 ( $\text{C}(\text{CH}_3)_3$ ). HRMS (ESI) calcd. for (M + Na)  $\text{C}_{31}\text{H}_{38}\text{O}_5\text{SiS}$ : 573.2102. Found: 573.2107.

**Phenyl 2,3,4,6-tetra-O-acetyl-1-thio- $\alpha$ -D-talopyranoside (21) and phenyl 2,3,4-tri-O-acetyl-6-O-*tert*-butyldiphenylsilyl-1-thio- $\alpha$ -D-talopyranoside (22)**

Talopyranoside **20** (20 mg, 0.036 mmol) was dissolved in 4:1 AcOH– $\text{H}_2\text{O}$  (2 mL) and heated at 50 °C for 1 h. The reaction mixture was then diluted with EtOAc (10 mL) and washed with satd aq  $\text{NaHCO}_3$  (2 x 5 mL). The organic layer was dried ( $\text{MgSO}_4$ ), and concentrated. The crude residue was then dissolved in pyridine (1.5 mL) and acetic anhydride (0.4 mL) and DMAP (small grain) were added. The reaction mixture was stirred for 1 day and then diluted with  $\text{CH}_2\text{Cl}_2$  (10 mL), before being washed with 0.5 M HCl (3 x 5 mL), water (5 mL) and brine (5 mL). The organic layer was dried ( $\text{MgSO}_4$ ), concentrated and the resulting crude mixture was purified by chromatography (2:1

hexane–EtOAc) to give **21** (10 mg, 65%) and **22** (6 mg, 26%) as colorless oils. Data for **21**:  $R_f$  0.27 (2:1, hexane–EtOAc);  $^1\text{H NMR}$  (500 MHz,  $\text{CDCl}_3$ )  $\delta_{\text{H}}$  7.34–7.51 (m, 2H, ArH), 7.30–7.34 (m, 3H, ArH), 5.57 (d, 1H,  $J = 1.2$  Hz, H-1), 5.36 (m, 1H, H-4), 5.31 (ddd, 1H,  $J = 3.8, 1.2, 1.2$  Hz, H-2), 5.25 (dd, 1H,  $J = 3.8, 3.8$  Hz, H-3), 4.77 (app. td, 1H,  $J = 6.4, 1.6$  Hz, H-5), 4.15–4.22 (m, 2H, H-6a, H-6b), 2.14 (s, 6H,  $\text{C(O)CH}_3$ ), 2.01 (s, 3H,  $\text{C(O)CH}_3$ ), 2.00 (s, 3H,  $\text{C(O)CH}_3$ ). Data for **22**:  $R_f$  0.52 (2:1, hexane–EtOAc);  $^1\text{H NMR}$  (400 MHz,  $\text{CDCl}_3$ )  $\delta_{\text{H}}$  7.61–7.64 (m, 4H, ArH), 7.34–7.44 (m, 8H, ArH), 7.20–7.24 (m, 3H, ArH), 5.51 (m, 1H, H-4), 5.48 (d, 1H,  $J = 1.3$  Hz, H-1), 5.32 (ddd, 1H,  $J = 3.7, 1.3, 1.3$  Hz, H-2), 5.27 (dd, 1H,  $J = 3.7, 3.7$  Hz, H-3), 4.77 (app. td, 1H,  $J = 6.0, 1.4$  Hz, H-5), 3.66–3.75 (m, 2H, H-6a, H-6b), 2.11 (s, 3H,  $\text{C(O)CH}_3$ ), 2.03 (s, 3H,  $\text{C(O)CH}_3$ ), 2.02 (s, 3H,  $\text{C(O)CH}_3$ ), 1.03 (s, 9H,  $\text{C(CH}_3)_3$ ).

**Octyl**                      **2-O-acetyl-6-O-tert-butyl-diphenylsilyl-3,4-O-isopropylidene- $\alpha$ -D-talopyranoside (23)**

Thioglycoside **13** (31 mg, 0.052 mmol) and powdered 4 Å molecular sieves (50 mg) were dried overnight under vacuum with  $\text{P}_2\text{O}_5$ . Dry  $\text{CH}_2\text{Cl}_2$  (2 mL) was added and the solution was cooled to 0 °C before the sequential addition of octanol (10  $\mu\text{L}$ , 0.065 mmol), *N*-iodosuccinimide (16 mg, 0.065 mmol) and TMSOTf (3  $\mu\text{L}$ , 0.016 mmol). The mixture was stirred for 1 h at 0 °C and neutralized with triethylamine, before being filtered through Celite and concentrated. The crude residue was purified by chromatography (4:1 hexane–EtOAc) to give **23** (272 mg, 89%) as a colorless oil.  $R_f$  0.38 (4:1 hexane–EtOAc);  $[\alpha]_{\text{D}} = +35.6$  (c 0.9,  $\text{CH}_2\text{Cl}_2$ );  $^1\text{H NMR}$  (500 MHz,  $\text{CDCl}_3$ )  $\delta_{\text{H}}$  7.68–7.73 (m, 4H, ArH), 7.35–7.45 (m, 6H, ArH), 4.92 (dd, 1H,  $J = 6.2, 2.9$  Hz, H-2),



4.86 (d, 1H,  $J = 6.2$  Hz, H-1), 4.56 (dd, 1H,  $J = 7.6, 2.9$  Hz, H-3), 4.32 (dd, 1H,  $J = 7.6, 1.7$  Hz, H-4), 3.79–3.89 (m, 3H, H-5, H-6a, H-6b), 3.75 (dt, 1H,  $J = 9.7, 6.7$  Hz, octyl OCH<sub>2</sub>), 3.39 (dt, 1H,  $J = 9.7, 6.9$  Hz, octyl OCH<sub>2</sub>), 2.16 (s, 3H, C(O)CH<sub>3</sub>), 1.50–1.60 (m, 2H, octyl OCH<sub>2</sub>CH<sub>2</sub>), 1.44 (s, 3H, C(CH<sub>3</sub>)<sub>2</sub>), 1.20–1.34 (m, 13H, C(CH<sub>3</sub>)<sub>2</sub>, octyl CH<sub>2</sub>), 1.06 (s, 9H, C(CH<sub>3</sub>)<sub>3</sub>), 0.88 (t, 3H,  $J = 6.9$  Hz, octyl CH<sub>3</sub>); <sup>13</sup>C NMR (125 MHz, CDCl<sub>3</sub>)  $\delta_C$  170.3 (C=O), 135.7 (2 x Ar), 135.6 (2 x Ar), 135.5 (2 x Ar), 127.6(1) (2 x Ar), 127.5(8) (4 x Ar), 110.5 (isopropylidene C), 97.4 (C-1), 74.1 (C-4), 72.3 (C-3), 70.9 (C-2), 70.7 (C-5), 67.9 (octyl OCH<sub>2</sub>), 62.6 (C-6), 31.8 (octyl CH<sub>2</sub>), 29.5 (octyl CH<sub>2</sub>), 29.4 (octyl CH<sub>2</sub>), 29.3 (octyl CH<sub>2</sub>), 26.8 (C(CH<sub>3</sub>)<sub>3</sub>), 26.1 (C(CH<sub>3</sub>)<sub>2</sub>), 26.0 (octyl CH<sub>2</sub>), 25.3 (C(CH<sub>3</sub>)<sub>2</sub>), 22.6 (octyl CH<sub>2</sub>), 21.1 (C(O)CH<sub>3</sub>), 19.2 (C(CH<sub>3</sub>)<sub>3</sub>), 14.1 (octyl CH<sub>3</sub>). HRMS (ESI) calcd. for (M + Na) C<sub>35</sub>H<sub>52</sub>O<sub>7</sub>Si: 635.3375. Found: 635.3374.

**Octyl 2,3,4-tri-*O*-benzoyl-6-*O*-*tert*-butyldiphenylsilyl- $\alpha$ -D-mannopyranosyl-(1 $\rightarrow$ 6)-2,3,4-tri-*O*-benzyl- $\alpha$ -D-mannopyranoside (26)**

Thioglycoside **11**<sup>3</sup> (4.12 g, 4.9 mmol), alcohol **10**<sup>4</sup> (2.30 g, 4.1 mmol), and powdered 4 Å molecular sieves (2.5 g) were dried overnight under vacuum with P<sub>2</sub>O<sub>5</sub>. Dry CH<sub>2</sub>Cl<sub>2</sub> (100 mL) was added and the reaction mixture was cooled to 0 °C before the addition of *N*-iodosuccinimide (1.5 g, 6.2 mmol) and TMSOTf (0.22 mL, 1.2 mmol). The mixture was stirred for 1 h at 0 °C and neutralized with triethylamine, before being filtered through Celite and concentrated. The crude residue was purified by chromatography (6:1 hexane–EtOAc) to give **26** (4.45 g, 85%) as a pale yellow oil.  $R_f$  0.26 (6:1 hexane–EtOAc);  $[\alpha]_D = -30.2$  (c 3.0, CH<sub>2</sub>Cl<sub>2</sub>); <sup>1</sup>H NMR (600 MHz, CDCl<sub>3</sub>)  $\delta_H$  8.13–8.17 (m, 2H, ArH), 7.83–7.91 (m, 4H, ArH), 7.72–7.76 (m, 2H, ArH), 7.56–7.61 (m, 3H, ArH), 7.51–

7.55 (m, 1H, ArH), 7.18–7.46 (m, 26H, ArH), 7.13–7.17 (m, 2H, ArH), 6.18 (dd, 1H,  $J = 10.2, 10.2$  Hz, H-4'), 5.88 (dd, 1H,  $J = 10.2, 3.3$  Hz, H-3'), 5.77 (dd, 1H,  $J = 3.3, 1.8$  Hz, H-2'), 5.23 (d, 1H,  $J = 1.8$  Hz, H-1'), 5.02 (d, 1H,  $J = 11.4$  Hz, PhCH<sub>2</sub>), 4.84 (d, 1H,  $J = 1.8$  Hz, H-1), 4.75 (d, 1H,  $J = 12.0$  Hz, PhCH<sub>2</sub>), 4.71 (d, 1H,  $J = 12.0$  Hz, PhCH<sub>2</sub>), 4.69 (d, 1H,  $J = 11.4$  Hz, PhCH<sub>2</sub>), 4.65 (s, 2H, PhCH<sub>2</sub>), 4.22 (ddd, 1H,  $J = 10.2, 3.0, 3.0$  Hz, H-5'), 3.92–3.98 (m, 3H, H-3, H-4, H-6a), 3.83–3.89 (m, 2H, H-5, H-6b), 3.83 (d, 2H,  $J = 3.0$  Hz, H-6a', H-6b'), 3.80 (dd, 1H,  $J = 2.4, 1.8$  Hz, H-2), 3.76 (dt, 1H,  $J = 9.6, 6.6$  Hz, octyl OCH<sub>2</sub>), 3.42 (dt, 1H,  $J = 9.6, 6.6$  Hz, octyl OCH<sub>2</sub>), 1.54–1.63 (m, 2H, octyl OCH<sub>2</sub>CH<sub>2</sub>), 1.18–1.40 (m, 10H, octyl CH<sub>2</sub>), 1.07 (s, 9H, C(CH<sub>3</sub>)<sub>3</sub>), 0.84 (t, 3H,  $J = 6.6$  Hz, octyl CH<sub>3</sub>); <sup>13</sup>C NMR (125 MHz, CDCl<sub>3</sub>) δ<sub>C</sub> 165.4 (C=O), 165.3 (C=O), 165.2 (C=O), 138.5 (Ar), 138.5 (Ar), 138.5 (Ar), 135.8 (2C, Ar), 135.8 (2C, Ar), 133.1 (Ar), 133.0 (Ar), 132.8 (Ar), 130.0 (Ar), 129.8, 129.7(0), 129.6(7), 129.6, 129.5(2), 129.4(9), 129.4(6), 128.5, 128.3(7), 128.3(3), 128.3(0), 128.2(6), 128.1(7), 127.8(4), 127.8(2), 127.7, 127.6, 127.5, 127.4(7) (37C, Ar), 97.7(1) (C-1'/C-1, <sup>1</sup>J<sub>C,H</sub> = 172.3 Hz), 97.6(6) (C-1'/C-1, <sup>1</sup>J<sub>C,H</sub> = 168.8 Hz), 80.6 (C-3), 75.0 (PhCH<sub>2</sub>), 74.9(4) (C-2), 74.9(0) (C-4), 72.6 (PhCH<sub>2</sub>), 72.1 (PhCH<sub>2</sub>), 71.4 (C-5), 71.2 (C-5'), 70.8 (C-2'), 70.7 (C-3'), 67.8 (octyl OCH<sub>2</sub>), 66.8(7) (C-6), 66.8(1) (C-4'), 62.5 (C-6'), 31.8 (octyl CH<sub>2</sub>), 29.5 (2C, octyl CH<sub>2</sub>), 29.3 (octyl CH<sub>2</sub>), 26.7 (C(CH<sub>3</sub>)<sub>3</sub>), 26.2 (octyl CH<sub>2</sub>), 22.7 (octyl CH<sub>2</sub>), 19.2 (C(CH<sub>3</sub>)<sub>3</sub>), 14.1 (octyl CH<sub>3</sub>). HRMS (ESI) calcd. for (M + Na) C<sub>78</sub>H<sub>86</sub>O<sub>14</sub>Si: 1297.5679. Found: 1297.5683.

**Octyl 2,3,4-tri-O-benzoyl- $\alpha$ -D-mannopyranosyl-(1 $\rightarrow$ 6)-2,3,4-tri-O-benzyl- $\alpha$ -D-mannopyranoside (27)**

Silylated disaccharide **26** (4.0 g, 3.1 mmol) was dissolved in THF (25 mL) and 70% HF-pyridine (2 mL) and pyridine (5 mL) were added and the solution was stirred overnight. The crude product was then diluted with CH<sub>2</sub>Cl<sub>2</sub> (150 mL), washed with H<sub>2</sub>O (50 mL), 1 M HCl (2 x 50 mL), and satd aq NaHCO<sub>3</sub> (50 mL). The organic layer was dried (Na<sub>2</sub>SO<sub>4</sub>), filtered, concentrated and the residue was purified by chromatography to give **27** as a colorless oil (2.2 g, 66%): *R*<sub>f</sub> 0.34 (3:1 hexane–EtOAc); [α]<sub>D</sub> = –28.3 (*c* 0.4, CH<sub>2</sub>Cl<sub>2</sub>); <sup>1</sup>H NMR (600 MHz, CDCl<sub>3</sub>) δ<sub>H</sub> 8.09–8.13 (m, 2H, ArH), 7.93–7.97 (m, 2H, ArH), 7.78–7.83 (m, 2H, ArH), 7.59–7.64 (m, 1H, ArH), 7.47–7.56 (m, 3H, ArH), 7.20–7.44 (m, 20H, ArH), 6.00 (dd, 1H, *J* = 10.2, 3.6 Hz, H-3'), 5.81 (dd, 1H, *J* = 10.2, 10.2 Hz, H-4'), 5.74 (dd, 1H, *J* = 3.6, 1.8 Hz, H-2'), 5.21 (d, 1H, *J* = 1.8 Hz, H-1'), 5.04 (d, 1H, *J* = 10.6 Hz, PhCH<sub>2</sub>), 4.82 (d, 1H, *J* = 1.8 Hz, H-1), 4.77 (d, 1H, *J* = 12.6 Hz, PhCH<sub>2</sub>), 4.72 (d, 1H, *J* = 12.6 Hz, PhCH<sub>2</sub>), 4.69 (d, 1H, *J* = 11.6 Hz, PhCH<sub>2</sub>), 4.65 (s, 2H, PhCH<sub>2</sub>), 4.11 (ddd, 1H, *J* = 10.2, 3.6, 3.0 Hz, H-5'), 3.92–3.98 (m, 3H, H-3, H-4, H-6a), 3.82–3.89 (m, 2H, H-5, H-6b), 3.79 (dd, 1H, *J* = 2.4, 1.8 Hz, H-2), 3.71–3.80 (m, 2H, H-6a', octyl OCH<sub>2</sub>), 3.66 (ddd, 1H, *J* = 12.6, 6.0, 3.6 Hz, H-6b'), 3.40 (dt, 1H, *J* = 9.6, 6.6 Hz, octyl OCH<sub>2</sub>), 2.59 (dd, 1H, *J* = 8.4, 6.0 Hz, OH), 1.52–1.64 (m, 2H, octyl OCH<sub>2</sub>CH<sub>2</sub>), 1.18–1.40 (m, 10H, octyl CH<sub>2</sub>), 0.85 (t, 3H, *J* = 7.2 Hz, octyl CH<sub>3</sub>); <sup>13</sup>C NMR (125 MHz, CDCl<sub>3</sub>) δ<sub>C</sub> 166.5 (C=O), 165.3 (C=O), 165.2 (C=O), 138.4(9) (Ar), 138.4(8) (Ar), 138.4(2) (Ar), 133.6 (Ar), 133.4 (Ar), 133.0 (Ar), 129.9(3), 129.8(8), 129.7, 129.5, 129.3, 128.9, 128.6, 128.5, 128.4, 128.3(4), 128.2(9), 128.2, 127.8, 127.7, 127.6, 127.5 (30C, Ar), 97.8 (C-1'/C-1), 97.7 (C-1'/C-1), 80.5 (C-3), 75.0 (PhCH<sub>2</sub>), 74.9 (C-2/C-4), 74.8 (C-2/C-4), 72.7 (PhCH<sub>2</sub>), 72.1 (PhCH<sub>2</sub>), 71.2 (C-5), 70.8 (C-5'), 70.6 (C-2'), 69.6 (C-3'), 67.8 (octyl OCH<sub>2</sub>), 67.5 (C-4'), 67.2 (C-6), 61.3 (C-6'), 31.8 (octyl CH<sub>2</sub>), 29.5 (2C, octyl

CH<sub>2</sub>), 29.3 (octyl CH<sub>2</sub>), 26.2 (octyl CH<sub>2</sub>), 22.7 (octyl CH<sub>2</sub>), 14.1 (octyl CH<sub>3</sub>). HRMS (ESI) calcd. for (M + Na) C<sub>62</sub>H<sub>68</sub>O<sub>14</sub>: 1059.4501. Found: 1059.4488.

**Octyl 2,3,4-tri-O-benzoyl-6-O-p-toluenesulfonyl- $\alpha$ -D-mannopyranosyl-(1 $\rightarrow$ 6)-2,3,4-tri-O-benzyl- $\alpha$ -D-mannopyranoside (28)**

Disaccharide **27** (155 mg, 0.15 mmol) was dissolved in pyridine (2 mL) and the solution was cooled to 0 °C in an ice bath followed by the addition of *p*-toluenesulfonyl chloride (58 mg, 0.30 mmol). The reaction mixture was stirred overnight and then was diluted with CH<sub>2</sub>Cl<sub>2</sub> (25 mL), washed with 1 M HCl (3 x 10 mL), satd aq NaHCO<sub>3</sub> (10 mL) and H<sub>2</sub>O (10 mL). The organic layer was dried (MgSO<sub>4</sub>), concentrated and the crude product was then purified by chromatography (3:1 hexane–EtOAc) to give **28** as a colorless oil (162 mg, 91%): *R*<sub>f</sub> 0.36 (3:1 hexane–EtOAc); [ $\alpha$ ]<sub>D</sub> = –22.9 (c 0.4, CH<sub>2</sub>Cl<sub>2</sub>); <sup>1</sup>H NMR (600 MHz, CDCl<sub>3</sub>)  $\delta$ <sub>H</sub> 8.06–8.09 (m, 2H, ArH), 7.82–7.86 (m, 2H, ArH), 7.77–7.81 (m, 2H, ArH), 7.72–7.76 (m, 2H, ArH), 7.59–7.64 (m, 1H, ArH), 7.46–7.54 (m, 3H, ArH), 7.18–7.44 (m, 20H, ArH), 7.13–7.17 (m, 2H, ArH), 5.84 (dd, 1H, *J* = 10.0, 2.9 Hz, H-3'), 5.81 (dd, 1H, *J* = 10.0, 10.0 Hz, H-4'), 5.68 (dd, 1H, *J* = 2.9, 2.0 Hz, H-2'), 5.12 (d, 1H, *J* = 2.0 Hz, H-1'), 5.02 (d, 1H, *J* = 11.3 Hz, PhCH<sub>2</sub>), 4.84 (d, 1H, *J* = 1.9 Hz, H-1), 4.77 (d, 1H, *J* = 12.5 Hz, PhCH<sub>2</sub>), 4.73 (d, 1H, *J* = 12.5 Hz, PhCH<sub>2</sub>), 4.68 (d, 1H, *J* = 11.3 Hz, PhCH<sub>2</sub>), 4.65 (s, 2H, PhCH<sub>2</sub>), 4.37 (ddd, 1H, *J* = 10.0, 4.9, 2.4 Hz, H-5'), 4.27 (dd, 1H, *J* = 11.0, 2.4 Hz, H-6a'), 4.16 (dd, 1H, *J* = 11.0, 4.9 Hz, H-6b'), 3.91–3.98 (m, 2H, H-3, H-4), 3.89 (dd, 1H, *J* = 11.1, 5.9 Hz, H-6a), 3.80–3.87 (m, 2H, H-5, H-6b), 3.80 (dd, 1H, *J* = 2.0, 1.9 Hz, H-2), 3.74 (dt, 1H, *J* = 9.7, 6.7 Hz, octyl OCH<sub>2</sub>), 3.40 (dt, 1H, *J* = 9.7, 6.5 Hz, octyl OCH<sub>2</sub>), 2.30 (s, 3H, tosyl CH<sub>3</sub>), 1.52–1.62 (m, 2H, octyl OCH<sub>2</sub>CH<sub>2</sub>), 1.18–1.40

(m, 10H, octyl  $CH_2$ ), 0.84 (t, 3H,  $J = 6.9$  Hz, octyl  $CH_3$ );  $^{13}C$  NMR (125 MHz,  $CDCl_3$ )  $\delta_C$  165.2 (C=O), 165.1(7) (C=O), 165.0(8) (C=O), 144.5 (Ar), 138.4(9) (Ar), 138.4(7) (Ar), 138.4(5) (Ar), 133.4 (Ar), 133.3 (Ar), 133.0 (Ar), 132.7 (Ar), 130.0, 129.7, 129.6, 129.4, 129.2, 129.0, 128.6, 128.4, 128.3(4), 128.2(8), 128.2(0), 128.1, 127.9(2), 127.8(6), 127.7, 127.5(3), 127.5(1) (34C, Ar), 97.7 (C-1), 97.5 (C-1'), 80.4 (C-3), 75.1 (Ph $CH_2$ ), 74.8 (2C, C-2, C-4), 72.7 (Ph $CH_2$ ), 72.1 (Ph $CH_2$ ), 71.3 (C-5), 70.3 (C-2'), 69.8 (C-3'), 68.6 (C-5'), 68.0 (C-6'), 67.8 (octyl  $OCH_2$ ), 67.3 (C-6), 66.9 (C-4'), 31.8 (octyl  $CH_2$ ), 29.5 (2C, octyl  $CH_2$ ), 29.3 (octyl  $CH_2$ ), 26.2 (octyl  $CH_2$ ), 22.7 (octyl  $CH_2$ ), 21.5 (tosyl  $CH_3$ ), 14.1 (octyl  $CH_3$ ). HRMS (ESI) calcd. for (M + Na)  $C_{69}H_{74}O_{16}S$ : 1213.4590. Found: 1213.4593.

**Octyl 6-azido-2,3,4-tri-O-benzoyl-6-deoxy- $\alpha$ -D-mannopyranosyl-(1 $\rightarrow$ 6)-2,3,4-tri-O-benzyl- $\alpha$ -D-mannopyranoside (29)**

Tosylated disaccharide **28** (136 mg, 0.12 mmol) was dissolved in DMF (2 mL) and sodium azide (68 mg, 1.0 mmol) was added and the solution was heated under reflux for 6 h. The crude solution was then diluted with EtOAc (25 mL) and washed with  $H_2O$  (10 mL). The organic phase was dried ( $Na_2SO_4$ ), filtered, concentrated and the residue was purified by chromatography (6:1 hexane–EtOAc) to give **29** as a colorless oil (119 mg, 98%):  $R_f$  0.31 (6:1 hexane–EtOAc);  $[\alpha]_D = +3.5$  (c 1.3,  $CH_2Cl_2$ );  $^1H$  NMR (500 MHz,  $CDCl_3$ )  $\delta_H$  8.10–8.14 (m, 2H, ArH), 7.90–7.95 (m, 2H, ArH), 7.78–7.83 (m, 2H, ArH), 7.60–7.65 (m, 1H, ArH), 7.48–7.55 (m, 3H, ArH), 7.18–7.45 (m, 20H, ArH), 5.89 (dd, 1H,  $J = 9.9, 3.2$  Hz, H-3'), 5.84 (dd, 1H,  $J = 9.9, 9.9$  Hz, H-4'), 5.73 (dd, 1H,  $J = 3.2, 1.8$  Hz, H-2'), 5.20 (d, 1H,  $J = 1.8$  Hz, H-1'), 5.03 (d, 1H,  $J = 11.3$  Hz, Ph $CH_2$ ), 4.83 (d, 1H,  $J$

= 1.7 Hz, H-1), 4.76 (d, 1H,  $J = 11.2$  Hz, PhCH<sub>2</sub>), 4.71 (d, 1H,  $J = 11.3$  Hz, PhCH<sub>2</sub>), 4.69 (d, 1H,  $J = 11.2$  Hz, PhCH<sub>2</sub>), 4.64 (s, 2H, PhCH<sub>2</sub>), 4.33 (ddd, 1H,  $J = 9.9, 6.5, 3.2$  Hz, H-5'), 3.95–4.04 (m, 3H, H-3, H-4, H-6a), 3.90 (dd, 1H,  $J = 11.1, 1.7$  Hz, H-6b), 3.84–3.89 (m, 1H, H-5), 3.79 (dd, 1H,  $J = 2.2, 1.7$  Hz, H-2), 3.74 (dt, 1H,  $J = 9.7, 6.9$  Hz, octyl OCH<sub>2</sub>), 3.38–3.48 (m, 3H, H-6a', H-6b', octyl OCH<sub>2</sub>), 1.53–1.64 (m, 2H, octyl OCH<sub>2</sub>CH<sub>2</sub>), 1.18–1.40 (m, 10H, octyl CH<sub>2</sub>), 0.85 (t, 3H,  $J = 6.9$  Hz, octyl CH<sub>3</sub>); <sup>13</sup>C NMR (125 MHz, CDCl<sub>3</sub>) δ<sub>C</sub> 165.6 (C=O), 165.2 (C=O), 165.1 (C=O), 138.4(9) (2C, Ar), 138.4(5) (Ar), 133.4(4) (Ar), 133.4(1) (Ar), 133.0 (Ar), 129.9 (Ar), 129.8, 129.7, 129.5, 129.2, 129.0, 128.6, 128.4(4), 128.4(1), 128.3(5), 128.2(9), 128.2, 127.9, 127.8, 127.7, 127.6, 127.5(4), 127.5(3) (29C, Ar), 97.7 (C-1), 97.6 (C-1'), 80.5 (C-3), 75.1 (PhCH<sub>2</sub>), 74.9 (C-2/C-4), 74.8 (C-2/C-4), 72.7 (PhCH<sub>2</sub>), 72.1 (PhCH<sub>2</sub>), 71.3 (C-5), 70.4 (C-2'/C-5'), 70.1 (C-2'/C-5'), 69.7 (C-3'), 68.0 (C-4'), 67.8 (octyl OCH<sub>2</sub>), 67.3 (C-6), 51.2 (C-6'), 31.8 (octyl CH<sub>2</sub>), 29.5 (2C, octyl CH<sub>2</sub>), 29.3 (octyl CH<sub>2</sub>), 26.2 (octyl CH<sub>2</sub>), 22.7 (octyl CH<sub>2</sub>), 14.1 (octyl CH<sub>3</sub>). HRMS (ESI) calcd. for (M + Na) C<sub>62</sub>H<sub>67</sub>N<sub>3</sub>O<sub>13</sub>: 1084.4566. Found: 1084.4569. FTIR: 2102.3 cm<sup>-1</sup>.

**Octyl 2,3,4-tri-O-benzoyl-6-deoxy-6-trifluoroacetamido- $\alpha$ -D-mannopyranosyl-(1 $\rightarrow$ 6)- $\alpha$ -D-mannopyranoside (30)**

Azide **29** (50 mg, 0.047 mmol) was dissolved in pyridine (3 mL) and 20% Pd(OH)<sub>2</sub>-C (10 mg) was added. The mixture was stirred for 4.5 h under a H<sub>2</sub> atmosphere and the catalyst was separated by filtration through a short pad of Celite. The filtrate was concentrated and the residue was redissolved in pyridine (2 mL) before trifluoroacetic anhydride (16  $\mu$ L, 0.11 mmol) was added dropwise at 0 °C. The mixture was slowly

warmed to rt and stirred overnight. The solution was then diluted with EtOAc (25 mL), washed with H<sub>2</sub>O (10 mL) and satd aq NaHCO<sub>3</sub> (10 mL). The organic layer was dried (Na<sub>2</sub>SO<sub>4</sub>), concentrated and the resulting crude product was then redissolved in MeOH (6 mL) and 20% Pd(OH)<sub>2</sub>-C (10 mg) was added. The mixture was stirred overnight under a H<sub>2</sub> atmosphere and the catalyst was separated by filtration through a short pad of Celite. The filtrate was concentrated and the residue purified by chromatography (15:1 CH<sub>2</sub>Cl<sub>2</sub>-MeOH) to give **30** as a clear glass (28 mg, 68%): *R*<sub>f</sub> 0.35 (15:1 CH<sub>2</sub>Cl<sub>2</sub>-MeOH); [α]<sub>D</sub> = -29.3 (c 0.2, CH<sub>2</sub>Cl<sub>2</sub>); <sup>1</sup>H NMR (600 MHz, CDCl<sub>3</sub>) δ<sub>H</sub> 8.02–8.07 (m, 2H, ArH), 7.93–7.98 (m, 2H, ArH), 7.78–7.82 (m, 2H, ArH), 7.60–7.65 (m, 1H, ArH), 7.46–7.55 (m, 3H, ArH), 7.36–7.45 (m, 3H, ArH), 7.23–7.27 (m, 3H, ArH, C(O)NH), 5.96 (dd, 1H, *J* = 10.1, 3.4 Hz, H-3'), 5.75 (dd, 1H, *J* = 3.4, 1.8 Hz, H-2'), 5.70 (dd, 1H, *J* = 10.1, 10.1 Hz, H-4'), 5.25 (d, 1H, *J* = 1.8 Hz, H-1'), 4.87 (d, 1H, *J* = 1.3 Hz, H-1), 4.41 (ddd, 1H, *J* = 10.1, 4.9, 2.7 Hz, H-5'), 4.10 (dd, 1H, *J* = 11.4, 4.5 Hz, H-6a), 3.92–3.98 (m, 3H, H-6a', H-2, H-4), 3.92 (dd, 1H, *J* = 11.4, 1.9 Hz, H-6b), 3.85 (dd, 1H, *J* = 9.9, 3.0 Hz, H-3), 3.79 (dd, 1H, *J* = 9.9, 3.0, 1.9 Hz, H-5), 3.73 (dt, 1H, *J* = 9.7, 6.7 Hz, octyl OCH<sub>2</sub>), 3.41–3.50 (m, 2H, H-6b', octyl OCH<sub>2</sub>), 3.03 (br s, 2H, OH), 1.83 (br s, 1H, OH), 1.54–1.64 (m, 2H, octyl OCH<sub>2</sub>CH<sub>2</sub>), 1.18–1.42 (m, 10H, octyl CH<sub>2</sub>), 0.86 (t, 3H, *J* = 6.9 Hz, octyl CH<sub>3</sub>); <sup>13</sup>C NMR (125 MHz, CDCl<sub>3</sub>) δ<sub>C</sub> 166.5 (C=O), 165.6 (C=O), 165.4 (C=O), 157.5 (CF<sub>3</sub>C=O, <sup>2</sup>*J*<sub>C=O,F</sub> = 37.1 Hz), 133.8 (Ar), 133.7(7) (Ar), 133.4 (Ar), 129.9 (2C, Ar), 129.8 (2C, Ar), 129.7 (2C, Ar), 129.0 (Ar), 128.8 (Ar), 128.7 (2C, Ar), 128.6 (2C, Ar), 128.4 (2C, Ar), 128.3(5) (Ar), 116.0 (CF<sub>3</sub>, <sup>1</sup>*J* = 287.4 Hz), 99.9 (C-1), 97.7 (C-1'), 72.3 (C-3), 71.1 (C-5), 71.0 (C-2), 70.5 (C-2'), 69.4 (C-3'), 68.7 (C-4), 68.1 (octyl OCH<sub>2</sub>), 67.8(3) (C-4'), 67.8(1) (C-5'), 67.8 (C-6), 39.7 (C-6'), 31.8 (octyl CH<sub>2</sub>), 29.4 (2C, octyl

CH<sub>2</sub>), 29.3 (octyl CH<sub>2</sub>), 26.2 (octyl CH<sub>2</sub>), 22.6 (octyl CH<sub>2</sub>), 14.1 (octyl CH<sub>3</sub>); <sup>19</sup>F NMR (376.1 MHz, CDCl<sub>3</sub>) δ<sub>F</sub> -76.2 (s, 3F). HRMS (ESI) calcd. for (M + Na) C<sub>43</sub>H<sub>50</sub>NO<sub>14</sub>F<sub>3</sub>: 884.3076. Found: 884.3078.

**Octyl 2,3,4-tri-O-benzyl- $\alpha$ -D-glucopyranosyl-(1 $\rightarrow$ 6)-2,3,4-tri-O-benzyl- $\alpha$ -D-mannopyranoside (31)**

Thioglycoside **15** (110 mg, 0.14 mmol), alcohol **10**<sup>4</sup> (65 mg, 0.12 mmol), and powdered 4 Å molecular sieves (100 mg) were dried overnight under vacuum with P<sub>2</sub>O<sub>5</sub>. Dry CH<sub>2</sub>Cl<sub>2</sub> (4 mL) was added and the solution was cooled to 0 °C before the addition of *N*-iodosuccinimide (41 mg, 0.17 mmol) and TMSOTf (6  $\mu$ L, 0.035 mmol). The mixture was stirred for 1 h at 0 °C and neutralized with triethylamine, before being filtered through Celite and concentrated. The crude product was partially purified by chromatography (9:1 hexane–EtOAc) to give the desired disaccharide as a mixture of  $\alpha$  and  $\beta$  isomers (5:1). The silylated disaccharide mixture was then dissolved in THF (2 mL) and 1.0 M tetra-*n*-butylammonium fluoride in THF (0.31 mL, 0.31 mmol) was added and the solution was stirred at rt overnight. The solvent was evaporated and the residue was purified by chromatography (3:1 hexane–EtOAc) to give **31** (59 mg, 50%) as a colorless oil. *R*<sub>f</sub> 0.32 (3:1 hexane–EtOAc); [ $\alpha$ ]<sub>D</sub> = +33.5 (c 1.2, CH<sub>2</sub>Cl<sub>2</sub>); <sup>1</sup>H NMR (500 MHz, CDCl<sub>3</sub>) δ<sub>H</sub> 7.18–7.40 (m, 30H, ArH), 5.11 (d, 1H, *J* = 3.5 Hz, H-1'), 4.92 (d, 1H, *J* = 11.0 Hz, PhCH<sub>2</sub>), 4.88 (d, 1H, *J* = 11.1 Hz, PhCH<sub>2</sub>), 4.87 (d, 1H, *J* = 11.2 Hz, PhCH<sub>2</sub>), 4.81 (d, 1H, *J* = 1.7 Hz, H-1), 4.75 (d, 1H, *J* = 11.0 Hz, PhCH<sub>2</sub>), 4.62–4.72 (m, 7H, PhCH<sub>2</sub>), 4.55 (d, 1H, *J* = 11.6 Hz, PhCH<sub>2</sub>), 4.05 (dd, 1H, *J* = 9.6, 9.6 Hz, H-4), 4.00 (dd, 1H, *J* = 9.2, 9.2 Hz, H-3'), 3.92 (dd, 1H, *J* = 9.6, 3.2 Hz, H-3), 3.75–3.89 (m, 6H, H-5', H-6a', H-



2, H-5, H-6a, H-6b), 3.62–3.72 (m, 2H, H-6b', octyl OCH<sub>2</sub>), 3.51 (dd, 1H, *J* = 9.2, 9.2 Hz, H-4'), 3.47 (dd, 1H, *J* = 9.2, 3.5 Hz, H-2'), 3.33 (dt, 1H, *J* = 9.6, 6.7 Hz, octyl OCH<sub>2</sub>), 1.72 (dd, 1H, *J* = 7.7, 4.9 Hz, OH), 1.46–1.54 (m, 2H, octyl OCH<sub>2</sub>CH<sub>2</sub>), 1.20–1.34 (m, 10H, octyl CH<sub>2</sub>), 0.87 (t, 3H, *J* = 6.9 Hz, octyl CH<sub>3</sub>); <sup>13</sup>C NMR (125 MHz, CDCl<sub>3</sub>) δ<sub>C</sub> 138.9 (Ar), 138.8 (Ar), 138.7 (Ar), 138.4(2) (Ar), 138.4(0) (Ar), 138.3 (Ar), 128.4, 128.3, 128.2(9), 128.2(8), 128.2(2), 128.1(9), 128.0, 127.9(2), 127.9(1), 127.7, 127.6(3), 127.6(1), 127.5(3), 127.5(1), 127.5(0), 127.4(7) (30C, Ar), 97.8 (C-1), 96.3 (C-1'), 81.6 (C-3'), 80.4 (C-2'), 80.3 (C-3), 77.5 (C-4'), 75.5 (PhCH<sub>2</sub>), 75.3 (C-2), 75.1(4) (PhCH<sub>2</sub>), 75.1(0) (C-4), 74.9 (PhCH<sub>2</sub>), 72.9 (PhCH<sub>2</sub>), 72.6 (PhCH<sub>2</sub>), 72.2 (PhCH<sub>2</sub>), 72.0 (C-5'/C-5), 70.8 (C-5'/C-5), 67.7 (octyl OCH<sub>2</sub>), 65.8 (C-6), 62.0 (C-6'), 31.8 (octyl CH<sub>2</sub>), 29.4 (2C, octyl CH<sub>2</sub>), 29.2 (octyl CH<sub>2</sub>), 26.2 (octyl CH<sub>2</sub>), 22.7 (octyl CH<sub>2</sub>), 14.1 (octyl CH<sub>3</sub>). HRMS (ESI) calcd. for (M + Na) C<sub>62</sub>H<sub>74</sub>O<sub>11</sub>: 1017.5123. Found: 1017.5126.

**Octyl 2,3,4-tri-*O*-benzyl-6-*O*-*p*-toluenesulfonyl- $\alpha$ -D-glucopyranosyl-(1→6)-2,3,4-tri-*O*-benzyl- $\alpha$ -D-mannopyranoside (32)**

Disaccharide **31** (126 mg, 0.13 mmol) was dissolved in pyridine (3 mL) and the solution was cooled to 0°C in an ice bath followed by the addition of *p*-toluenesulfonyl chloride (49 mg, 0.25 mmol). The reaction mixture was stirred overnight and then the mixture was diluted with CH<sub>2</sub>Cl<sub>2</sub> (25 mL), washed with 1 M HCl (3 x 10 mL), satd aq NaHCO<sub>3</sub> (10 mL), and H<sub>2</sub>O (10 mL). The organic layer was dried (MgSO<sub>4</sub>), concentrated and the crude product was then purified by chromatography (6:1 hexane–EtOAc) to give **31** (129 mg, 89%) as a colorless oil: *R*<sub>f</sub> 0.27 (6:1 hexane–EtOAc); [ $\alpha$ ]<sub>D</sub> = +43.1 (c 1.3, CH<sub>2</sub>Cl<sub>2</sub>); <sup>1</sup>H NMR (600 MHz, CDCl<sub>3</sub>) δ<sub>H</sub> 7.75–7.79 (m, 2H, ArH), 7.20–7.38 (m, 30H,

ArH), 7.12–7.16 (m, 2H, ArH), 5.02 (d, 1H,  $J = 3.4$  Hz, H-1'), 4.92 (d, 1H,  $J = 11.0$  Hz, PhCH<sub>2</sub>), 4.90 (d, 1H,  $J = 11.2$  Hz, PhCH<sub>2</sub>), 4.83 (d, 1H,  $J = 10.8$  Hz, PhCH<sub>2</sub>), 4.79 (d, 1H,  $J = 1.8$  Hz, H-1), 4.70 (d, 1H,  $J = 11.0$  Hz, PhCH<sub>2</sub>), 4.61–4.69 (m, 6H, PhCH<sub>2</sub>), 4.55 (d, 1H,  $J = 11.8$  Hz, PhCH<sub>2</sub>), 4.42 (d, 1H,  $J = 10.8$  Hz, PhCH<sub>2</sub>), 4.23 (dd, 1H,  $J = 10.6$ , 3.6 Hz, H-6a), 4.18 (dd, 1H,  $J = 10.6$ , 2.1 Hz, H-6b), 3.88–4.03 (m, 4H, H-3', H-5', H-3, H-5), 3.79 (dd, 1H,  $J = 3.1$ , 1.8 Hz, H-2), 3.74–3.80 (m, 2H, H-6a', H-6b', H-4), 3.64 (dt, 1H,  $J = 9.7$ , 6.8 Hz, octyl OCH<sub>2</sub>), 3.48 (dd, 1H,  $J = 10.1$ , 9.0 Hz, H-4'), 3.45 (dd, 1H,  $J = 9.6$ , 3.4 Hz, H-2'), 3.32 (dt, 1H,  $J = 9.7$ , 6.6 Hz, octyl OCH<sub>2</sub>), 2.38 (s, 3H, tosyl CH<sub>3</sub>), 1.44–1.54 (m, 2H, octyl OCH<sub>2</sub>CH<sub>2</sub>), 1.20–1.34 (m, 10H, octyl CH<sub>2</sub>), 0.87 (t, 3H,  $J = 6.9$  Hz, octyl CH<sub>3</sub>); <sup>13</sup>C NMR (125 MHz, CDCl<sub>3</sub>)  $\delta_C$  144.7 (Ar), 138.7 (Ar), 138.6(9) (Ar), 138.6(4) (Ar), 138.3(4) (Ar), 138.2(7) (Ar), 138.1 (Ar), 133.0 (Ar), 129.8, 128.4, 128.3(1), 128.3(0), 128.3, 128.2, 128.1, 128.0, 127.9, 127.7, 127.6(3), 127.6(0), 127.5(4), 127.5(1), 127.4(9) (34C, Ar), 97.8 (C-1), 96.4 (C-1'), 81.5 (C-3'), 80.5 (C-3), 79.9 (C-2'), 76.8 (C-4'), 75.4 (PhCH<sub>2</sub>), 75.3 (C-2), 75.0(8) (C-5'), 75.0(6) (PhCH<sub>2</sub>), 74.8 (PhCH<sub>2</sub>), 72.9 (PhCH<sub>2</sub>), 72.5 (PhCH<sub>2</sub>), 72.2 (PhCH<sub>2</sub>), 71.8 (C-4), 68.6(2) (C-6), 68.5(6) (C-5), 67.7 (octyl OCH<sub>2</sub>), 66.1 (C-6'), 31.8 (octyl CH<sub>2</sub>), 29.4(5) (octyl CH<sub>2</sub>), 29.4(2) (octyl CH<sub>2</sub>), 29.2 (octyl CH<sub>2</sub>), 26.2 (octyl CH<sub>2</sub>), 22.7 (octyl CH<sub>2</sub>), 21.6 (tosyl CH<sub>3</sub>), 14.1 (octyl CH<sub>3</sub>). HRMS (ESI) calcd. for (M + Na) C<sub>69</sub>H<sub>80</sub>O<sub>13</sub>S: 1171.5212. Found: 1171.5210.

**Octyl 6-amino-2,3,4-tri-O-benzyl-6-deoxy- $\alpha$ -D-glucopyranosyl-(1→6)-2,3,4-tri-O-benzyl- $\alpha$ -D-mannopyranoside (33)**

Tosylated disaccharide **32** (100 mg, 0.093 mmol) was dissolved in DMF (2 mL) and sodium azide (54 mg, 0.84 mmol) was added and the solution was heated under reflux

for 6 h. The crude product was then diluted with EtOAc (25 mL) and washed with H<sub>2</sub>O (10 mL). The organic layer was dried (Na<sub>2</sub>SO<sub>4</sub>), filtered, concentrated and the residue was purified by chromatography (6:1 hexane–EtOAc) to give **33** as a colorless oil (76 mg, 85%): *R*<sub>f</sub> 0.36 (6:1 hexane–EtOAc); [α]<sub>D</sub> = +58.6 (c 0.6, CH<sub>2</sub>Cl<sub>2</sub>); <sup>1</sup>H NMR (600 MHz, CDCl<sub>3</sub>) δ<sub>H</sub> 7.18–7.38 (m, 30H, ArH), 5.14 (d, 1H, *J* = 3.4 Hz, H-1'), 4.94 (d, 1H, *J* = 10.9 Hz, PhCH<sub>2</sub>), 4.91 (d, 1H, *J* = 11.1 Hz, PhCH<sub>2</sub>), 4.90 (d, 1H, *J* = 11.2 Hz, PhCH<sub>2</sub>), 4.81 (d, 1H, *J* = 1.7 Hz, H-1), 4.73 (d, 1H, *J* = 10.9 Hz, PhCH<sub>2</sub>), 4.70 (d, 1H, *J* = 10.9 Hz, PhCH<sub>2</sub>), 4.62–4.70 (m, 5H, PhCH<sub>2</sub>), 4.57 (d, 1H, *J* = 11.1 Hz, PhCH<sub>2</sub>), 4.56 (d, 1H, *J* = 11.8 Hz, PhCH<sub>2</sub>), 4.06 (dd, 1H, *J* = 9.6, 9.6 Hz, H-3), 3.98 (dd, 1H, *J* = 9.4, 9.4 Hz, H-3'), 3.86–3.95 (m, 3H, H-5', H-4, H-6a), 3.84 (dd, 1H, *J* = 11.7, 1.5 Hz, H-6b), 3.77–3.82 (m, 2H, H-2, H-5), 3.65 (dt, 1H, *J* = 9.7, 6.8 Hz, octyl OCH<sub>2</sub>), 3.51 (dd, 1H, *J* = 9.4, 3.4 Hz, H-2'), 3.42–3.48 (m, 2H, H-4', H-6a'), 3.30–3.36 (m, 2H, H-6b', octyl OCH<sub>2</sub>), 1.45–1.53 (m, 2H, octyl OCH<sub>2</sub>CH<sub>2</sub>), 1.20–1.34 (m, 10H, octyl CH<sub>2</sub>), 0.87 (t, 3H, *J* = 6.9 Hz, octyl CH<sub>3</sub>); <sup>13</sup>C NMR (125 MHz, CDCl<sub>3</sub>) δ<sub>C</sub> 138.7(7) (Ar), 138.7(3) (Ar), 138.6(8) (Ar), 138.4 (Ar), 138.3 (Ar), 138.2 (Ar), 128.4, 128.3(1), 128.2(6), 128.2(2), 128.1, 128.0, 127.9(7), 127.9(4), 127.8, 127.7, 127.6(1), 127.5(8), 127.5(1), 127.4(8) (30C, Ar), 97.8 (C-1), 96.3 (C-1'), 81.4 (C-3'), 80.4 (C-4), 80.2 (C-2'), 78.3 (C-4'), 75.5 (PhCH<sub>2</sub>), 75.3 (C-2), 75.1(4) (PhCH<sub>2</sub>), 75.1(2) (C-3), 75.0 (PhCH<sub>2</sub>), 72.8 (PhCH<sub>2</sub>), 72.5 (PhCH<sub>2</sub>), 72.2 (PhCH<sub>2</sub>), 71.9 (C-5), 69.9 (C-5'), 67.6 (octyl OCH<sub>2</sub>), 66.0 (C-6), 51.4 (C-6'), 31.8 (octyl CH<sub>2</sub>), 29.4 (2C, octyl CH<sub>2</sub>), 29.2 (octyl CH<sub>2</sub>), 26.2 (octyl CH<sub>2</sub>), 22.7 (octyl CH<sub>2</sub>), 14.1 (octyl CH<sub>3</sub>). HRMS (ESI) calcd. for (M + Na) C<sub>62</sub>H<sub>73</sub>N<sub>3</sub>O<sub>10</sub>: 1042.5188. Found: 1042.5188. FTIR: 2099.9 cm<sup>-1</sup>.

**Octyl 6-deoxy-6-trifluoroacetamido- $\alpha$ -D-glucopyranosyl-(1 $\rightarrow$ 6)- $\alpha$ -D-mannopyranoside (34)**

Azide **33** (67 mg, 0.066 mmol) was dissolved in pyridine (3 mL) and 20% Pd(OH)<sub>2</sub>-C (17 mg) was added. The mixture was stirred overnight under a H<sub>2</sub> atmosphere and the catalyst was separated by filtration through a short pad of Celite. The filtrate was concentrated and the residue was redissolved in pyridine (2 mL) before trifluoroacetic anhydride (20  $\mu$ L, 0.13 mmol) was added dropwise at 0 °C. The mixture was slowly warmed to rt and stirred overnight. The solution was then diluted with EtOAc (25 mL), washed with H<sub>2</sub>O (10 mL) and satd aq NaHCO<sub>3</sub> (10 mL). The organic layer was dried (Na<sub>2</sub>SO<sub>4</sub>), concentrated and the resulting crude product was then redissolved in MeOH (6 mL) and 20% Pd(OH)<sub>2</sub>-C (15 mg) was added. The mixture was stirred overnight under a H<sub>2</sub> atmosphere and the catalyst was separated by filtration through a short pad of Celite. The filtrate was concentrated and the residue purified by chromatography (8:1 CH<sub>2</sub>Cl<sub>2</sub>-MeOH) to give **34** as a clear glass (26 mg, 72%): *R*<sub>f</sub> 0.24 (8:1 CH<sub>2</sub>Cl<sub>2</sub>-MeOH); [ $\alpha$ ]<sub>D</sub> = +74.4 (c 0.4, CH<sub>3</sub>OH); <sup>1</sup>H NMR (600 MHz, CD<sub>3</sub>OD)  $\delta$ <sub>H</sub> 4.82 (d, 1H, *J* = 3.7 Hz, H-1'), 4.71 (d, 1H, *J* = 1.5, 1.8 Hz, H-1), 3.96 (dd, 1H, *J* = 10.7, 4.0 Hz, H-6a), 3.74–3.80 (m, 3H, H-5', H-2, H-4), 3.60–3.73 (m, 5H, H-3', H-6a', H-3, H-5, octyl OCH<sub>2</sub>), 3.58 (dd, 1H, *J* = 10.7, 2.2 Hz, H-6b), 3.48 (dd, 1H, *J* = 14.0, 7.8 Hz, H-6b'), 3.40 (dt, 1H, *J* = 9.7, 6.4 Hz, octyl OCH<sub>2</sub>), 3.37 (dd, 1H, *J* = 9.7, 3.7 Hz, H-2'), 3.12 (dd, 1H, *J* = 9.9, 8.9 Hz, H-4'), 1.52–1.62 (m, 2H, octyl OCH<sub>2</sub>CH<sub>2</sub>), 1.24–1.42 (m, 10H, octyl CH<sub>2</sub>), 0.89 (t, 3H, *J* = 6.9 Hz, octyl CH<sub>3</sub>); <sup>13</sup>C NMR (125 MHz, CD<sub>3</sub>OD)  $\delta$ <sub>C</sub> 159.3 (CF<sub>3</sub>C=O, <sup>2</sup>*J*<sub>C=O,F</sub> = 37.1 Hz), 117.6 (CF<sub>3</sub>, <sup>1</sup>*J* = 285.9 Hz), 101.8 (C-1), 99.7 (C-1'), 75.0 (C-3'), 73.8 (C-2'), 73.6 (C-4'), 72.8(3) (C-3), 72.8(2) (C-5), 72.2 (C-2), 71.1 (C-5'), 68.8 (octyl OCH<sub>2</sub>), 68.3 (C-

4), 67.1 (C-6), 42.1 (C-6'), 33.0 (octyl CH<sub>2</sub>), 30.6 (octyl CH<sub>2</sub>), 30.5 (octyl CH<sub>2</sub>), 30.4 (octyl CH<sub>2</sub>), 27.4 (octyl CH<sub>2</sub>), 23.7 (octyl CH<sub>2</sub>), 14.4 (octyl CH<sub>3</sub>); <sup>19</sup>F NMR (376.1 MHz, CDCl<sub>3</sub>) δ<sub>F</sub> -77.5 (s, 3F). HRMS (ESI) calcd. for (M + Na) C<sub>22</sub>H<sub>38</sub>NO<sub>11</sub>F<sub>3</sub>: 572.2289. Found: 572.2286.

**Octyl 2,3,4,-tri-O-benzoyl-6-O-(tert-butyldiphenylsilyl)-α-D-mannopyranosyl-(1→6)-2-O-acetyl-3,4-O-isopropylidene-α-D-talopyranoside (35)**

Thioglycoside **11**<sup>5</sup> (186 mg, 0.20 mmol), alcohol **14** (55 mg, 0.15 mmol), and powdered 4 Å molecular sieves (100 mg) were dried overnight under vacuum with P<sub>2</sub>O<sub>5</sub>. Dry CH<sub>2</sub>Cl<sub>2</sub> (4 mL) was added and the solution was cooled to 0 °C before the addition of *N*-iodosuccinimide (53 mg, 0.23 mmol) and TMSOTf (8 μL, 0.045 mmol). The mixture was stirred for 1 h at 0 °C and neutralized with triethylamine, before being filtered through Celite and concentrated. The crude product was purified by chromatography (4:1 hexane–EtOAc) to give **35** as a colorless oil (144 mg, 90%): *R*<sub>f</sub> 0.21 (4:1 hexane–EtOAc); [α]<sub>D</sub> = -47.1 (c 0.3, CH<sub>2</sub>Cl<sub>2</sub>); <sup>1</sup>H NMR (600 MHz, CDCl<sub>3</sub>) δ<sub>H</sub> 8.11–8.16 (m, 2H, ArH), 7.83–7.94 (m, 4H, ArH), 7.70–7.75 (m, 2H, ArH), 7.51–7.62 (m, 3H, ArH), 7.25–7.46 (m, 12H, ArH), 7.12–7.17 (m, 2H, ArH), 6.20 (dd, 1H, *J* = 10.2, 10.2 Hz, H-4'), 5.82 (dd, 1H, *J* = 10.2, 3.3 Hz, H-3'), 5.73 (dd, 1H, *J* = 3.3, 1.8 Hz, H-2'), 5.16 (d, 1H, *J* = 1.8 Hz, H-1'), 5.01 (dd, 1H, *J* = 5.7, 3.0 Hz, H-2), 4.91 (d, 1H, *J* = 5.7 Hz, H-1), 4.64 (dd, 1H, *J* = 7.8, 3.0 Hz, H-3), 4.41 (dd, 1H, *J* = 7.8, 1.8 Hz, H-4), 4.20–4.25 (m, 1H, H-5'), 4.02–4.07 (m, 1H, H-5), 3.82–3.97 (m, 4H, H-6a', H-6b', H-6a, octyl OCH<sub>2</sub>), 3.76 (dd, 1H, *J* = 10.2, 6.0 Hz, H-6b), 3.46 (dd, 1H, *J* = 9.6, 6.6 Hz, octyl OCH<sub>2</sub>), 2.05 (s, 3H, C(O)CH<sub>3</sub>), 1.54–1.64 (m, 2H, octyl CH<sub>2</sub>), 1.48 (s, 3H, C(CH<sub>3</sub>)<sub>2</sub>), 1.36 (s, 3H, C(CH<sub>3</sub>)<sub>2</sub>), 1.10–1.34

(m, 10H, octyl  $CH_2$ ), 1.08 (s, 9H,  $C(CH_3)_3$ ), 0.80 (t, 3H,  $J = 7.2$  Hz, octyl  $CH_3$ );  $^{13}C$  NMR (125 MHz,  $CDCl_3$ )  $\delta_C$  170.2 (C=O), 165.5 (C=O), 165.4 (C=O), 165.2 (C=O), 135.8 (2C, Ar), 135.5 (2C, Ar), 133.3 (Ar), 133.1(1) (Ar), 133.0(7) (Ar), 133.0(0) (Ar), 129.9(9) (2C, Ar), 129.8 (2C, Ar), 129.7(3) (2C, Ar), 129.7(0) (2C, Ar), 129.6 (Ar), 129.5 (Ar), 129.4 (Ar), 129.3 (Ar), 128.5 (2C, Ar), 128.3 (2C, Ar), 128.2 (2C, Ar), 127.6 (2C, Ar), 127.5 (2C, Ar), 110.8 ( $C(CH_3)_2$ ), 97.5 (C-1,  $^1J_{C,H} = 173.0$  Hz), 97.3 (C-1',  $^1J_{C,H} = 172.2$  Hz), 74.0 (C-4), 72.3 (C-3), 71.4 (C-5'), 70.7 (C-2, C-3'), 70.5 (C-2'), 68.3 (C-5), 68.1 (octyl  $OCH_2$ ), 66.5 (C-4'), 66.0 (C-6), 62.4 (C-6'), 31.8 (octyl  $CH_2$ ), 29.5 (octyl  $CH_2$ ), 29.4 (octyl  $CH_2$ ), 29.3 (octyl  $CH_2$ ), 26.7 ( $C(CH_3)_3$ ), 26.1(0) ( $C(CH_3)_2$ ), 26.0(7) (octyl  $CH_2$ ), 25.3 ( $C(CH_3)_2$ ), 22.6 (octyl  $CH_2$ ), 21.1 ( $C(O)CH_3$ ), 19.2 ( $C(CH_3)_3$ ), 14.0 (octyl  $CH_3$ ). HRMS (ESI) calcd. for (M + Na)  $C_{62}H_{74}O_{15}Si$ : 1109.4689. Found: 1109.4695.

**Octyl 2,3,4,-tri-O-benzoyl- $\alpha$ -D-mannopyranosyl-(1 $\rightarrow$ 6)-2-O-acetyl-3,4-O-isopropylidene- $\alpha$ -D-talopyranoside (36)**

Disaccharide **35** (137 mg, 0.13 mmol) was dissolved in THF (4 mL) and then 70% HF-pyridine (0.2 mL) and pyridine (1 mL) were added. After stirring overnight, the crude product was then diluted with  $CH_2Cl_2$  (50 mL), washed with  $H_2O$  (15 mL), 1 M HCl (2 x 15 mL), and satd aq  $NaHCO_3$  (15 mL). The organic layer was dried ( $Na_2SO_4$ ), filtered, concentrated, and the residue was purified by chromatography to give **36** as a colorless oil (82 mg, 77%):  $R_f$  0.55 (1:1 hexane–EtOAc);  $[\alpha]_D = -42.0$  (c 0.3,  $CH_2Cl_2$ );  $^1H$  NMR (500 MHz,  $CDCl_3$ )  $\delta_H$  8.08–8.12 (m, 2H, ArH), 7.94–7.98 (m, 2H, ArH), 7.79–7.84 (m, 2H, ArH), 7.59–7.64 (m, 1H, ArH), 7.46–7.60 (m, 3H, ArH), 7.36–7.45 (m, 3H, ArH), 7.23–7.28 (m, 2H, ArH), 5.93 (dd, 1H,  $J = 10.1, 3.4$  Hz, H-3'), 5.80 (dd, 1H,  $J = 10.1,$

10.1 Hz, H-4'), 5.67 (dd, 1H,  $J = 3.4, 1.7$  Hz, H-2'), 5.15 (d, 1H,  $J = 1.7$  Hz, H-1'), 4.98 (dd, 1H,  $J = 6.2, 2.9$  Hz, H-2), 4.90 (d, 1H,  $J = 6.2$  Hz, H-1), 4.62 (dd, 1H,  $J = 7.6, 2.9$  Hz, H-3), 4.39 (dd, 1H,  $J = 7.6, 1.8$  Hz, H-4), 4.18 (ddd, 1H,  $J = 10.1, 3.9, 2.2$  Hz, H-5'), 4.05 (ddd, 1H,  $J = 7.0, 4.9, 1.8$  Hz, H-5), 3.92 (dd, 1H,  $J = 10.4, 7.0$  Hz, H-6a), 3.74–3.91 (m, 4H, H-6a', H-6b', H-6b, octyl OCH<sub>2</sub>), 3.46 (dt, 1H,  $J = 9.7, 6.7$  Hz, octyl OCH<sub>2</sub>), 2.75 (dd, 1H,  $J = 8.4, 5.7$  Hz, OH), 2.16 (s, 3H, C(O)CH<sub>3</sub>), 1.57–1.65 (m, 2H, octyl CH<sub>2</sub>), 1.51 (s, 3H, C(CH<sub>3</sub>)<sub>2</sub>), 1.34 (s, 3H, C(CH<sub>3</sub>)<sub>2</sub>), 1.14–1.54 (m, 10H, octyl CH<sub>2</sub>), 0.83 (t, 3H,  $J = 6.8$  Hz, octyl CH<sub>3</sub>); <sup>13</sup>C NMR (125 MHz, CDCl<sub>3</sub>) δ<sub>C</sub> 170.2 (C=O), 166.4 (C=O), 165.4 (C=O), 165.3 (C=O), 133.6 (Ar), 133.5 (Ar), 133.1 (Ar), 129.9(1) (2C, Ar), 129.8(6) (2C, Ar), 129.7 (2C, Ar), 129.3 (Ar), 129.2 (Ar), 128.8 (Ar), 128.6 (2C, Ar), 128.5 (2C, Ar), 128.3 (2C, Ar), 110.9 (C(CH<sub>3</sub>)<sub>2</sub>), 97.6 (C-1'/C-1), 97.5 (C-1'/C-1), 74.3 (C-4), 72.4 (C-3), 71.1 (C-5'), 70.6 (C-2'), 70.5 (C-2), 69.6 (C-3'), 68.7 (C-5), 68.3 (octyl OCH<sub>2</sub>), 67.3 (C-4'), 66.7 (C-6), 61.5 (C-6'), 31.8 (octyl CH<sub>2</sub>), 29.5 (octyl CH<sub>2</sub>), 29.4 (octyl CH<sub>2</sub>), 29.3 (octyl CH<sub>2</sub>), 26.0(9) (C(CH<sub>3</sub>)<sub>2</sub>), 26.0(7) (octyl CH<sub>2</sub>), 25.3 (C(CH<sub>3</sub>)<sub>2</sub>), 22.6 (octyl CH<sub>2</sub>), 21.1 (C(O)CH<sub>3</sub>), 14.0 (octyl CH<sub>3</sub>). HRMS (ESI) calcd. for (M + Na) C<sub>46</sub>H<sub>56</sub>O<sub>15</sub>: 871.3511. Found: 871.3508.

**Octyl 6-azido-2,3,4,-tri-O-benzoyl-6-deoxy- $\alpha$ -D-mannopyranosyl-(1→6)-2-O-acetyl-3,4-O-isopropylidene- $\alpha$ -D-talopyranoside (37)**

Disaccharide **36** (86 mg, 0.10 mmol) was dissolved in pyridine (1 mL) and the solution was cooled to 0 °C in an ice bath followed by the addition of *p*-toluenesulfonyl chloride (50 mg, 0.25 mmol). The reaction mixture was stirred overnight and then diluted with CH<sub>2</sub>Cl<sub>2</sub> (25 mL), washed with 1 M HCl (3 x 10 mL), satd aq NaHCO<sub>3</sub> (10 mL), and H<sub>2</sub>O

(10 mL). The organic layer was dried ( $\text{MgSO}_4$ ) and concentrated to colorless oil. The crude intermediate was dissolved in DMF (2 mL) and sodium azide (65 mg, 1.0 mmol) was added and the solution was heated under reflux for 4 h. The crude product was then diluted with EtOAc (25 mL) and washed with  $\text{H}_2\text{O}$  (10 mL). The organic layer was dried ( $\text{Na}_2\text{SO}_4$ ), filtered, concentrated and the residue purified by chromatography (3:1 hexane–EtOAc) to give **37** as a colorless oil (74 mg, 84%):  $R_f$  0.27 (3:1 hexane–EtOAc);  $[\alpha]_D = -11.3$  (c 0.8,  $\text{CH}_2\text{Cl}_2$ );  $^1\text{H}$  NMR (500 MHz,  $\text{CDCl}_3$ )  $\delta_{\text{H}}$  8.08–8.14 (m, 2H, ArH), 7.91–7.96 (m, 2H, ArH), 7.78–7.83 (m, 2H, ArH), 7.59–7.65 (m, 1H, ArH), 7.47–7.55 (m, 3H, ArH), 7.35–7.45 (m, 3H, ArH), 7.23–7.29 (m, 2H, ArH), 5.82–5.88 (m, 2H, H-3', H-4'), 5.68 (dd, 1H,  $J = 2.8, 1.7$  Hz, H-2'), 5.12 (d, 1H,  $J = 1.7$  Hz, H-1'), 4.99 (dd, 1H,  $J = 6.2, 2.8$  Hz, H-2), 4.93 (d, 1H,  $J = 6.2$  Hz, H-1), 4.64 (dd, 1H,  $J = 7.6, 2.8$  Hz, H-3), 4.40 (dd, 1H,  $J = 7.6, 1.8$  Hz, H-4), 4.36 (ddd, 1H,  $J = 10.1, 6.4, 2.6$  Hz, H-5'), 4.06 (ddd, 1H,  $J = 7.6, 7.2, 5.1$  Hz, H-5), 3.99 (dd, 1H,  $J = 10.2, 7.2$  Hz, H-6a), 3.88 (dt, 1H,  $J = 9.8, 6.5$  Hz, octyl  $\text{OCH}_2$ ), 3.79 (dd, 1H,  $J = 10.2, 5.1$  Hz, H-6b), 3.47–3.56 (m, 2H, H-6a', octyl  $\text{OCH}_2$ ), 3.44 (dd, 1H,  $J = 13.3, 2.6$  Hz, H-6b'), 2.17 (s, 3H,  $\text{C}(\text{O})\text{CH}_3$ ), 1.57–1.66 (m, 2H, octyl  $\text{CH}_2$ ), 1.54 (s, 3H,  $\text{C}(\text{CH}_3)_2$ ), 1.36 (s, 3H,  $\text{C}(\text{CH}_3)_2$ ), 1.12–1.38 (m, 10H, octyl  $\text{CH}_2$ ), 0.82 (t, 3H,  $J = 6.8$  Hz, octyl  $\text{CH}_3$ );  $^{13}\text{C}$  NMR (125 MHz,  $\text{CDCl}_3$ )  $\delta_{\text{C}}$  170.2 (C=O), 165.6 (C=O), 165.4 (C=O), 165.2 (C=O), 133.5 (2C, Ar), 133.1 (Ar), 129.9 (2C, Ar), 129.8 (2C, Ar), 129.7 (2C, Ar), 129.3 (Ar), 129.1 (Ar), 128.8 (Ar), 128.6 (2C, Ar), 128.5 (2C, Ar), 128.3 (2C, Ar), 111.0 ( $\text{C}(\text{CH}_3)_2$ ), 97.6 (C-1), 97.2 (C-1'), 74.1 (C-4), 72.4 (C-3), 70.8 (C-2), 70.4 (C-5'), 70.2 (C-2'), 69.7 (C-5), 68.3 (C-3'), 68.2 (octyl  $\text{OCH}_2$ ), 67.9 (C-4'), 66.4 (C-6), 51.3 (C-6'), 31.8 (octyl  $\text{CH}_2$ ), 29.6 (octyl  $\text{CH}_2$ ), 29.4 (octyl  $\text{CH}_2$ ), 29.3 (octyl  $\text{CH}_2$ ), 26.1 (octyl  $\text{CH}_2$ ), 26.0 ( $\text{C}(\text{CH}_3)_2$ ), 25.4 ( $\text{C}(\text{CH}_3)_2$ ), 22.6 (octyl  $\text{CH}_2$ ), 21.1 ( $\text{C}(\text{O})\text{CH}_3$ ), 14.0



(octyl CH<sub>3</sub>). HRMS (ESI) calcd. for (M + Na) C<sub>46</sub>H<sub>55</sub>N<sub>3</sub>O<sub>14</sub>: 896.3576. Found: 896.3573.  
FTIR: 2102.6 cm<sup>-1</sup>.

**Octyl 2,3,4,6-tetra-O-benzoyl- $\alpha$ -D-mannopyranosyl-(1 $\rightarrow$ 6)-2,3,4-tri-O-benzyl- $\alpha$ -D-glucopyranoside (38)**

Thioglycoside **12**<sup>5</sup> (39 mg, 0.056 mmol), alcohol **16**<sup>6</sup> (25 mg, 0.045 mmol), and powdered 4 Å molecular sieves (75 mg) were dried overnight under vacuum with P<sub>2</sub>O<sub>5</sub>. Dry CH<sub>2</sub>Cl<sub>2</sub> (3 mL) was added and the solution was cooled to 0 °C before the addition of *N*-iodosuccinimide (16 mg, 0.068 mmol) and TMSOTf (2  $\mu$ L, 0.014 mmol). The mixture was stirred for 1 h at 0 °C and neutralized with triethylamine, before being filtered through Celite and concentrated. The crude product was purified by chromatography (4:1 hexane–EtOAc) to give **38** (47 mg, 92%) as a pale yellow oil. *R*<sub>f</sub> 0.26 (4:1 hexane–EtOAc); [ $\alpha$ ]<sub>D</sub> = +16.4 (c 0.4, CH<sub>2</sub>Cl<sub>2</sub>); <sup>1</sup>H NMR (500 MHz, CDCl<sub>3</sub>)  $\delta$ <sub>H</sub> 8.04–8.12 (m, 4H, ArH), 7.90–7.94 (m, 2H, ArH), 7.82–7.87 (m, 2H, ArH), 7.49–7.63 (m, 3H, ArH), 7.25–7.47 (m, 24H, ArH), 6.09 (dd, 1H, *J* = 10.1, 10.1 Hz, H-4'), 5.90 (dd, 1H, *J* = 10.1, 3.3 Hz, H-3'), 5.75 (dd, 1H, *J* = 3.3, 1.8 Hz, H-2'), 5.18 (d, 1H, *J* = 1.8 Hz, H-1'), 5.05 (d, 1H, *J* = 11.0 Hz, PhCH<sub>2</sub>), 5.04 (d, 1H, *J* = 11.7 Hz, PhCH<sub>2</sub>), 4.85 (d, 1H, *J* = 11.0 Hz, PhCH<sub>2</sub>), 4.79 (d, 1H, *J* = 11.7 Hz, PhCH<sub>2</sub>), 4.79 (d, 1H, *J* = 3.7 Hz, H-1), 4.72 (d, 1H, *J* = 11.7 Hz, PhCH<sub>2</sub>), 4.69 (d, 1H, *J* = 11.7 Hz, PhCH<sub>2</sub>), 4.65 (dd, 1H, *J* = 12.1, 2.4 Hz, H-6a'), 4.43 (ddd, 1H, *J* = 10.1, 4.4, 2.4 Hz, H-5'), 4.37 (dd, 1H, *J* = 12.1, 4.4 Hz, H-6b'), 4.07 (dd, 1H, *J* = 9.2, 9.2 Hz, H-3), 3.97 (dd, 1H, *J* = 11.0, 5.1 Hz, H-6a), 3.92 (ddd, 1H, *J* = 9.0, 5.1, 1.5 Hz, H-5), 3.83 (dd, 1H, *J* = 11.0, 1.5 Hz, H-6b), 3.73 (dt, 1H, *J* = 9.8, 7.0 Hz, octyl OCH<sub>2</sub>), 3.59 (dd, 1H, *J* = 9.2, 3.7 Hz, H-2), 3.56 (dd, 1H, *J* = 9.2, 9.0 Hz, H-4),

3.47 (dt, 1H,  $J = 9.8, 6.6$  Hz, octyl  $\text{OCH}_2$ ), 1.64–1.76 (m, 2H, octyl  $\text{OCH}_2\text{CH}_2$ ), 1.18–1.46 (m, 10H, octyl  $\text{CH}_2$ ), 0.86 (t, 3H,  $J = 7.0$  Hz, octyl  $\text{CH}_3$ );  $^{13}\text{C}$  NMR (125 MHz,  $\text{CDCl}_3$ )  $\delta_{\text{C}}$  166.1 (Ar), 165.5 (Ar), 165.3 (Ar), 165.2 (Ar), 138.9 (Ar), 138.4 (Ar), 138.3 (Ar), 133.4, 133.1, 133.0(2), 130.0(0), 129.8(5), 129.8(0), 129.7(5), 129.7(3), 129.4, 129.2, 129.1, 128.6, 128.4(8), 128.4(3), 128.4(1), 128.3(6), 128.2(7), 127.9(8), 127.9(2), 127.8, 127.7(7), 127.7(0), 127.5 (35C, Ar), 97.8 (C-1',  $^1J_{\text{C,H}} = 174.6$  Hz), 96.5 (C-1), 82.1 (C-3), 80.5 (C-2), 77.9 (C-4), 75.6 (Ph $\text{CH}_2$ ), 75.1 (Ph $\text{CH}_2$ ), 73.1 (Ph $\text{CH}_2$ ), 70.3, 70.0 (C-2', C-3'), 69.9 (C-5), 68.9 (C-5'), 68.3 (octyl  $\text{OCH}_2$ ), 66.9 (C-4'), 66.7 (C-6), 62.7 (C-6'), 31.9 (octyl  $\text{CH}_2$ ), 29.5(2) (octyl  $\text{CH}_2$ ), 29.4(8) (octyl  $\text{CH}_2$ ), 29.3 (octyl  $\text{CH}_2$ ), 26.3 (octyl  $\text{CH}_2$ ), 22.7 (octyl  $\text{CH}_2$ ), 14.1 (octyl  $\text{CH}_3$ ). HRMS (ESI) calcd. for (M + Na)  $\text{C}_{69}\text{H}_{72}\text{O}_{15}$ : 1163.4763. Found: 1163.4766.

**Octyl 2-O-acetyl-3,4-O-isopropylidene-6-O-(tert-butylidiphenylsilyl)- $\alpha$ -D-mannopyranosyl-(1 $\rightarrow$ 6)-2,3,4-tri-O-benzyl- $\alpha$ -D-talopyranoside (39)**

Thioglycoside **13** (39 mg, 0.065 mmol), alcohol **10**<sup>4</sup> (33 mg, 0.057 mmol), and powdered 4 Å molecular sieves (75 mg) were dried overnight under vacuum with  $\text{P}_2\text{O}_5$ . Dry  $\text{CH}_2\text{Cl}_2$  (3 mL) was added and the solution was cooled to 0 °C before the addition of *N*-iodosuccinimide (20 mg, 0.23 mmol) and TMSOTf (4  $\mu\text{L}$ , 0.020 mmol). The mixture was stirred for 1 h at 0 °C and neutralized with triethylamine, before being filtered through Celite and concentrated. The crude product was purified by chromatography (6:1 hexane–EtOAc) to give **39** as a colorless oil (54 mg, 81%):  $R_f$  0.22 (6:1 hexane–EtOAc);  $[\alpha]_{\text{D}} = +33.6$  (c 0.8,  $\text{CH}_2\text{Cl}_2$ );  $^1\text{H}$  NMR (600 MHz,  $\text{CDCl}_3$ )  $\delta_{\text{H}}$  7.68–7.74 (m, 4H, ArH), 7.22–7.42 (m, 21H, ArH), 5.12 (d, 1H,  $J = 6.2$ , H-1'), 4.99 (dd, 1H,  $J = 6.2, 3.1$  Hz, H-2'),

4.86 (d, 1H,  $J = 10.7$  Hz, PhCH<sub>2</sub>), 4.79 (d, 1H,  $J = 1.8$  Hz, H-1), 4.72 (d, 1H,  $J = 12.4$  Hz, PhCH<sub>2</sub>), 4.68 (d, 1H,  $J = 12.4$  Hz, PhCH<sub>2</sub>), 4.63 (s, 2H, PhCH<sub>2</sub>), 4.58 (dd, 1H,  $J = 7.6, 3.1$  Hz, H-3'), 4.56 (d, 1H,  $J = 10.7$  Hz, PhCH<sub>2</sub>), 4.38 (dd, 1H,  $J = 7.6, 1.9$  Hz, H-4'), 3.79–3.96 (m, 7H, H-5', H-6a', H6b', H-3, H-4, H6a, H-6b), 3.75 (dd, 1H,  $J = 3.1, 1.8$  Hz, H-2), 3.70 (ddd, 1H,  $J = 9.6, 5.8, 1.5$  Hz, H-5), 3.60 (dt, 1H,  $J = 9.7, 6.7$  Hz, octyl OCH<sub>2</sub>), 3.31 (dt, 1H,  $J = 9.7, 6.5$  Hz, octyl OCH<sub>2</sub>), 2.04 (s, 3H, C(O)CH<sub>3</sub>), 1.42–1.53 (m, 5H, octyl CH<sub>2</sub>, C(CH<sub>3</sub>)<sub>2</sub>), 1.21–1.34 (m, 13H, octyl CH<sub>2</sub>, C(CH<sub>3</sub>)<sub>2</sub>), 1.06 (s, 9H, C(CH<sub>3</sub>)<sub>3</sub>), 0.89 (t, 3H,  $J = 7.2$  Hz, octyl CH<sub>3</sub>); <sup>13</sup>C NMR (125 MHz, CDCl<sub>3</sub>) δ<sub>C</sub> 170.4 (C=O), 138.7 (Ar), 138.5 (Ar), 135.7 (2C, Ar), 135.6 (2C, Ar), 133.5(3) (Ar), 133.4(6) (Ar), 129.5(9) (Ar), 129.5(8) (Ar), 128.3(3), 128.2(9), 128.0, 127.8, 127.6, 127.5(9), 127.5(5), 127.5(1), 127.4 (20C, Ar), 110.4 (C(CH<sub>3</sub>)<sub>2</sub>), 97.6(2) (C-1, <sup>1</sup>J<sub>C,H</sub> = 167.0 Hz), 97.6(0) (C-1', <sup>1</sup>J<sub>C,H</sub> = 175.8 Hz), 80.3 (C-3), 75.3 (C-2), 75.1(7) (C-4), 75.1(6) (PhCH<sub>2</sub>), 73.9 (C-4'), 72.7 (PhCH<sub>2</sub>), 72.2 (C-3'), 72.1 (PhCH<sub>2</sub>), 71.7 (C-5), 70.8 (C-2'), 70.3 (C-5'), 67.4 (octyl OCH<sub>2</sub>), 66.3 (C-6), 62.4 (C-6'), 31.8 (octyl CH<sub>2</sub>), 29.4 (2C, octyl CH<sub>2</sub>), 29.2 (octyl CH<sub>2</sub>), 26.8 (C(CH<sub>3</sub>)<sub>3</sub>), 26.2 (octyl CH<sub>2</sub>), 26.1 (C(CH<sub>3</sub>)<sub>2</sub>), 25.3 (C(CH<sub>3</sub>)<sub>2</sub>), 22.7 (octyl CH<sub>2</sub>), 20.9 (C(O)CH<sub>3</sub>), 19.2 (C(CH<sub>3</sub>)<sub>3</sub>), 14.1 (octyl CH<sub>3</sub>). HRMS (ESI) calcd. for (M + Na) C<sub>62</sub>H<sub>80</sub>O<sub>12</sub>Si: 1067.5311. Found: 1067.5315.

**Octyl 2,3,4-tri-O-benzyl-6-O-(*tert*-butyldiphenylsilyl)-α-D-glucopyranosyl-(1→6)-2-O-acetyl-3,4-O-isopropylidene-α-D-talopyranoside (40)**

Thioglycoside **15** (143 mg, 0.18 mmol), alcohol **14** (53 mg, 0.14 mmol), and powdered 4 Å molecular sieves (150 mg) were dried overnight under vacuum with P<sub>2</sub>O<sub>5</sub>. Dry CH<sub>2</sub>Cl<sub>2</sub> (5 mL) was added and the solution was cooled to 0 °C before the addition of *N*-

iodosuccinimide (50 mg, 0.21 mmol) and TMSOTf (8  $\mu$ L, 0.042 mmol). The mixture was stirred for 1 h at 0 °C and neutralized with triethylamine, before being filtered through Celite and concentrated. The crude product was purified by chromatography (4:1 hexane–EtOAc) to give the  $\alpha$  glycoside (97 mg, 66%,  $R_f$  0.31, 4:1 hexane–EtOAc) and  $\beta$ -glycoside (32 mg, 22%,  $R_f$  0.38, 4:1 hexane–EtOAc) isomers, both as a colorless oils. Only the  $\alpha$  isomer **40** was fully characterized.  $[\alpha]_D = +40.1$  (c 1.8,  $\text{CH}_2\text{Cl}_2$ );  $^1\text{H}$  NMR (600 MHz,  $\text{CDCl}_3$ )  $\delta_{\text{H}}$  7.65–7.73 (m, 4H, ArH), 7.24–7.44 (m, 19H, ArH), 7.16–7.19 (m, 2H, ArH), 4.96 (d, 1H,  $J = 10.8$  Hz,  $\text{PhCH}_2$ ), 4.90–3.94 (m, 3H,  $\text{PhCH}_2$ , H-1', H-2), 4.84 (d, 1H,  $J = 6.4$  Hz, H-1), 4.81 (d, 1H,  $J = 10.8$  Hz,  $\text{PhCH}_2$ ), 4.78 (d, 1H,  $J = 11.9$  Hz,  $\text{PhCH}_2$ ), 4.74 (d, 1H,  $J = 11.9$  Hz,  $\text{PhCH}_2$ ), 4.66 (d, 1H,  $J = 11.1$  Hz,  $\text{PhCH}_2$ ), 4.57 (dd, 1H,  $J = 7.6, 2.8$  Hz, H-3), 4.39 (dd, 1H,  $J = 7.6, 1.7$  Hz, H-4), 4.01 (dd, 1H,  $J = 9.4, 9.4$  Hz, H-3'), 3.90–3.98 (m, 2H, H-6a', H-5), 3.87 (dd, 1H,  $J = 11.3, 1.6$  Hz, H-6b'), 3.78–3.83 (m, 1H, H-5'), 3.69–3.78 (m, 3H, H-4', H-6a, octyl  $\text{OCH}_2$ ), 3.61 (dd, 1H,  $J = 10.0, 6.5$  Hz, H-6b), 3.57 (dd, 1H,  $J = 9.4, 3.6$  Hz, H-2'), 3.35 (dt, 1H,  $J = 9.8, 6.6$  Hz, octyl  $\text{OCH}_2$ ), 2.15 (s, 3H,  $\text{C}(\text{O})\text{CH}_3$ ), 1.42–1.52 (m, 5H, octyl  $\text{CH}_2$ ,  $\text{C}(\text{CH}_3)_2$ ), 1.31 (s, 3H,  $\text{C}(\text{CH}_3)_2$ ), 1.15–1.30 (m, 10H, octyl  $\text{CH}_2$ ), 1.06 (s, 9H, *t*-Bu), 0.85 (t, 3H,  $J = 7.0$  Hz, octyl  $\text{CH}_3$ );  $^{13}\text{C}$  NMR (125 MHz,  $\text{CDCl}_3$ )  $\delta_{\text{C}}$  170.2 (C=O), 138.8 (Ar), 138.6 (Ar), 138.5 (Ar), 135.8 (2C, Ar), 135.6 (2C, Ar), 133.7 (Ar), 133.3 (Ar), 129.5(5), 129.5(1), 128.4, 128.3, 128.1, 127.7, 127.6(3), 127.6(0), 127.5, 127.4 (21C, Ar), 110.6 ( $\text{C}(\text{CH}_3)_2$ ), 97.4 (C-1,  $^1J_{\text{C,H}} = 172.3$  Hz), 96.9 (C-1'), 82.2 (C-3'), 80.4 (C-2'), 77.7 (C-4'), 75.9 ( $\text{PhCH}_2$ ), 74.9 ( $\text{PhCH}_2$ ), 74.2 (C-4), 75.2 (C-4), 72.8 ( $\text{PhCH}_2$ ), 72.4 (C-3), 71.5 (C-5'), 71.0 (C-2), 68.5 (C-5), 68.0 (octyl  $\text{OCH}_2$ ), 65.7 (C-6), 62.8 (C-6'), 31.8 (octyl  $\text{CH}_2$ ), 29.5 (octyl  $\text{CH}_2$ ), 29.4 (octyl  $\text{CH}_2$ ), 29.3 (octyl  $\text{CH}_2$ ), 26.8 ( $\text{C}(\text{CH}_3)_3$ ), 26.2 ( $\text{C}(\text{CH}_3)_2$ ), 26.0 (octyl  $\text{CH}_2$ ), 25.5

(C(CH<sub>3</sub>)<sub>2</sub>), 22.6 (octyl CH<sub>2</sub>), 21.1 (C(O)CH<sub>3</sub>), 19.3 (C(CH<sub>3</sub>)<sub>3</sub>), 14.1 (octyl CH<sub>3</sub>). HRMS (ESI) calcd. for (M + Na) C<sub>62</sub>H<sub>80</sub>O<sub>12</sub>Si: 1067.5311. Found: 1067.5312.

## References

1. J. Broddefalk, K.-E. Bergquist and J. Kihlberg, *Tetrahedron*, 1998, **54**, 12047–12070.
2. J. Ohlsson and G. Magnusson, *Carbohydr. Res.*, 2000, **329**, 49-55.
3. A. Watts and S. J. Williams, *Org. Biomol. Chem.*, 2005, 1982–1992.
4. V. Subramaniam, S. S. Gurcha, G. S. Besra and T. L. Lowary, *Biorg. Med. Chem.*, 2005, **13**, 1083–1094.
5. P. H. Tam and T. L. Lowary, *Carbohydr. Res.*, 2007, **342**, 1741–1772.
6. C. Wing, J. C. Errey, B. Mukhopadhyay, J. S. Blanchard and R. A. Field, *Org. Biomol. Chem.*, 2006, **4**, 3945–3950.

# <sup>1</sup>H NMR spectrum of 2

pht-7-191-A  
500 MHz 1D in CD3OD (ref. to CD3OD @ 3.30 ppm), temp 27.2 C -> actual temp = 27.0 C, sw500 probe

Pulse Sequence: s2pu1

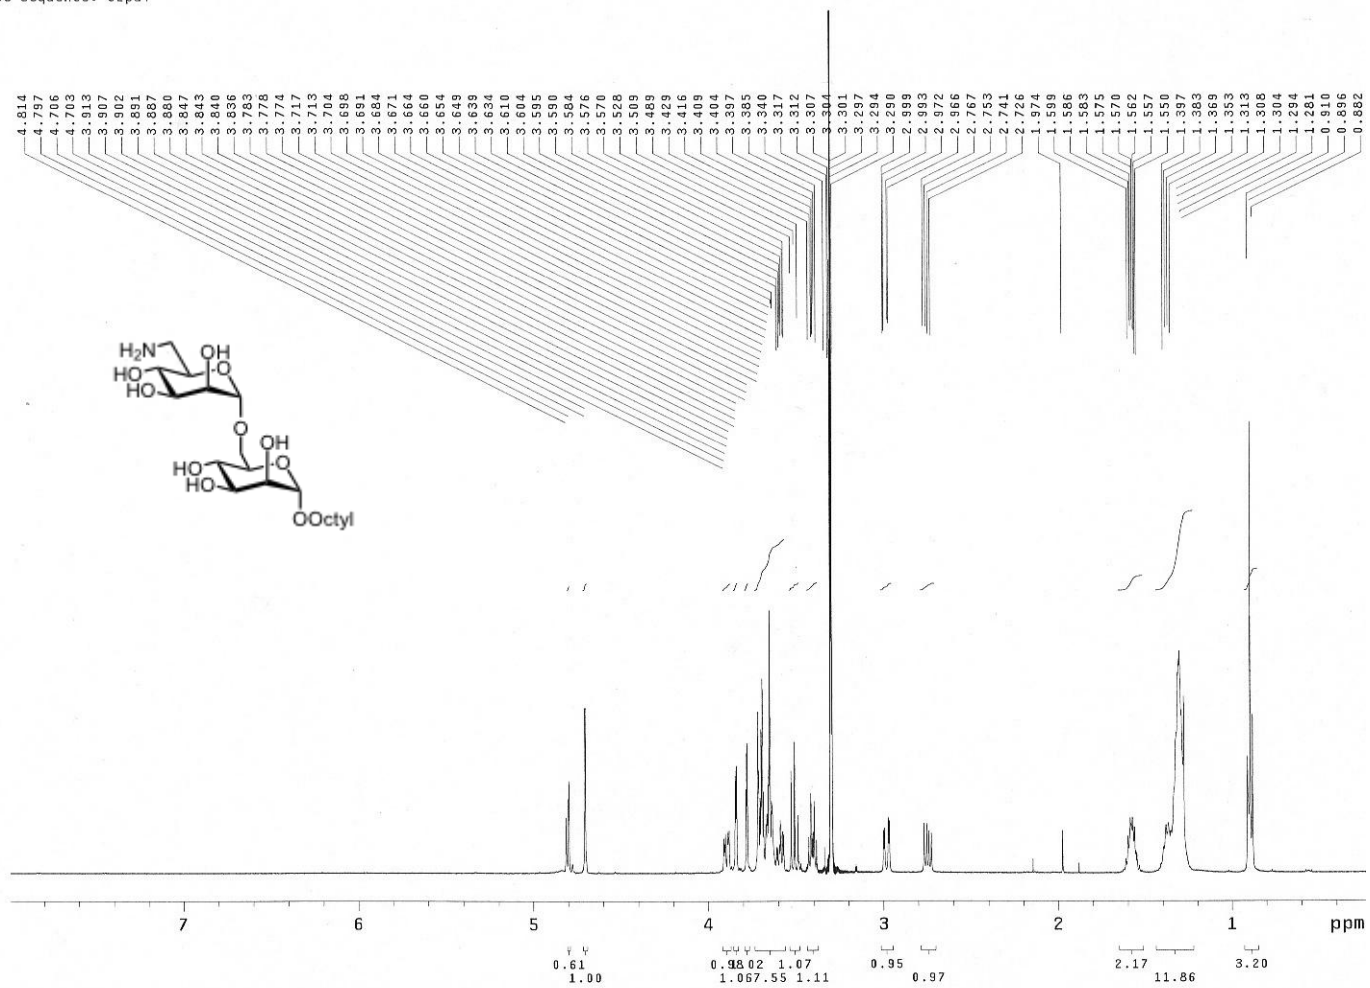

# <sup>13</sup>C NMR spectrum of 2

pht-7-191-A  
125 MHz APT in CD300 (ref. to CD300 @ 49.0 ppm), temp 27.2 C -> actual temp = 27.0 C, sw probe  
C & CH2 same, CH & CH3 opposite side of solvent signal  
date: Feb 16 2008 sweep width: 33827Hz acq.time: 2.08 relax.time: 0.1s # scans: 112  
file:/mnt/d600/home9/t11nmr/nmrdata/pht/pht-7/pht-7-189-A-APTC.fid

dig.res.: 0.5 Hz/pt hz/mm:104.3

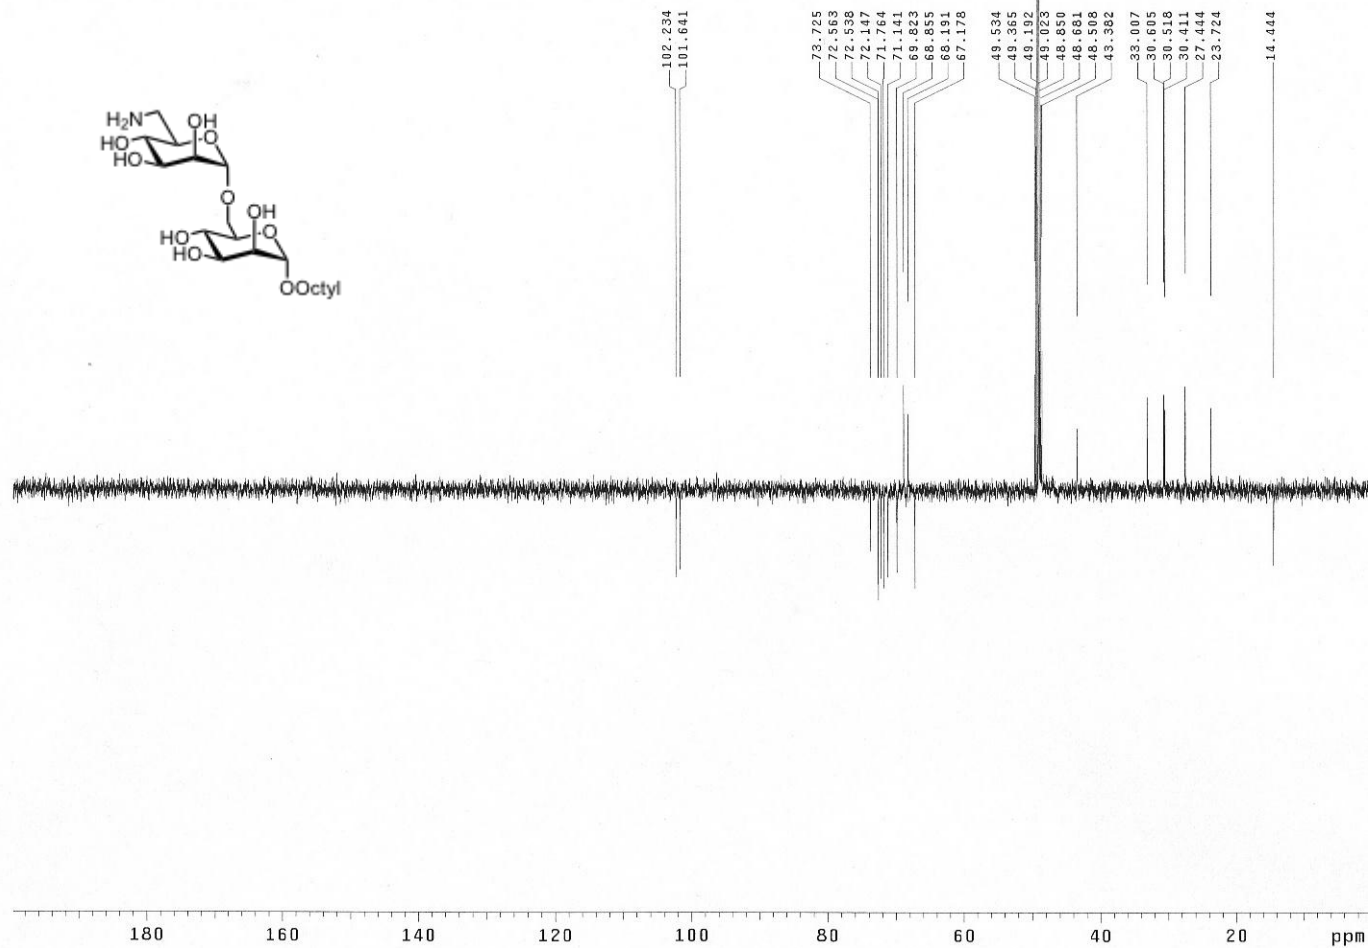

# <sup>1</sup>H NMR spectrum of 3

pht-4-143-A  
500 MHz 1D in CD3OD (ref. to CD3OD @ 3.30 ppm), temp 27.2 C -> actual temp = 27.0 C, sw500 probe  
Pulse Sequence: s2pu1

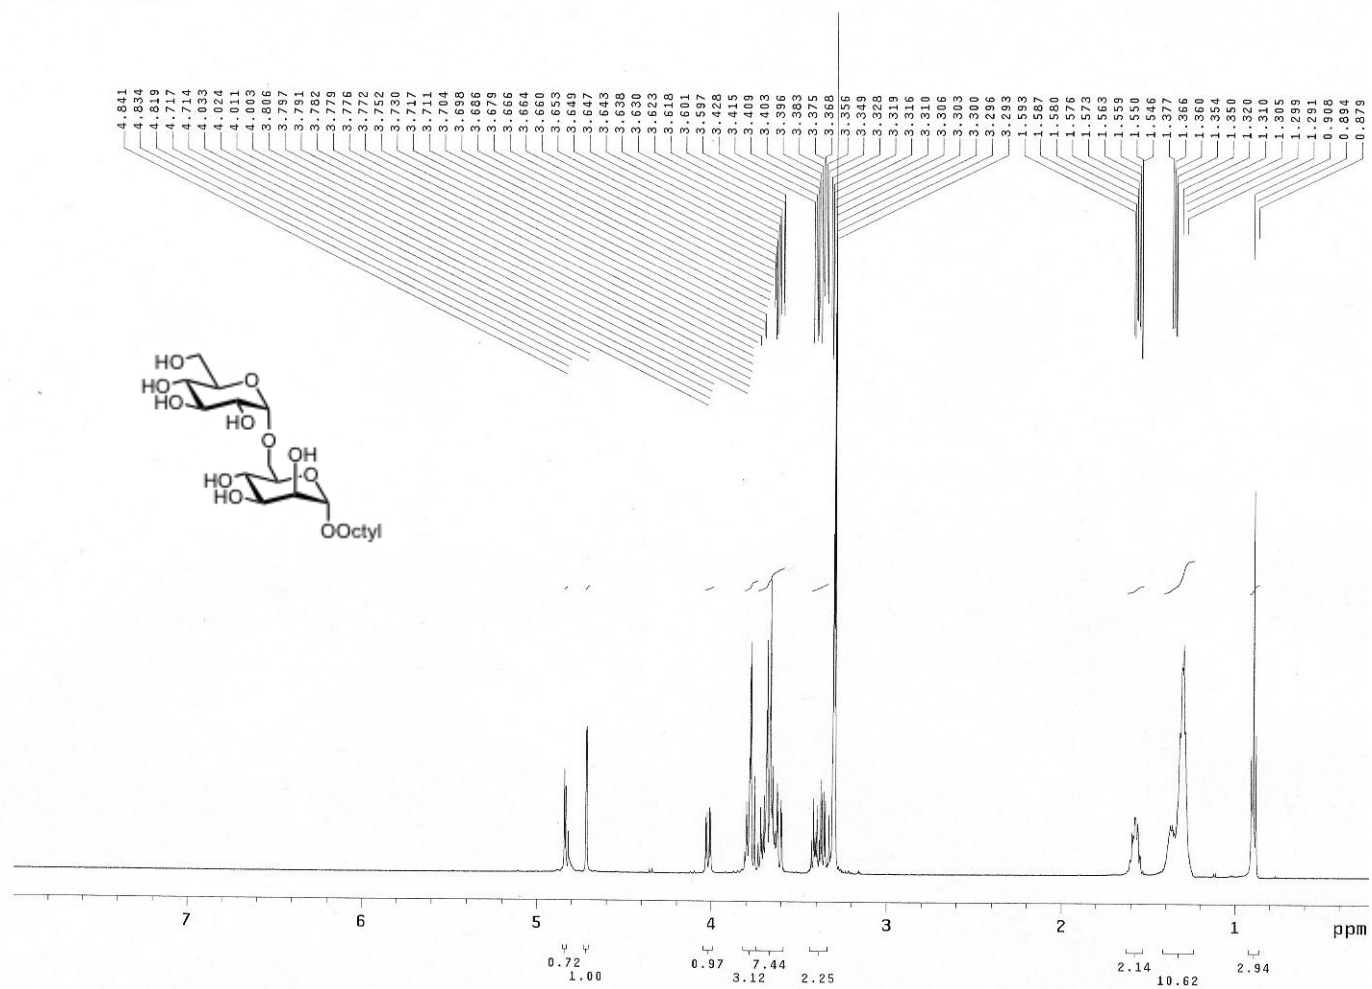



# <sup>13</sup>C NMR spectrum of 3

pht-4-143-A  
125 MHz APT in CD3OD (ref. to CD3OD @ 49.0 ppm), temp 27.2 C -> actual temp = 27.0 C, sw probe  
C & CH2 same, CH & CH3 opposite side of solvent signal  
date: Jul 3 2007 sweep width: 33827Hz acq.time: 2.0s relax.time: 0.1s # scans: 21072 dig.res.: 0.5 Hz/pt hz/mm:104.1  
file:/mnt/d600/home9/t11nmr/nmrdata/pht/pht-4/2007.07.03.i5\_pht-4-143-A-APTC\_C13\_apt.fid

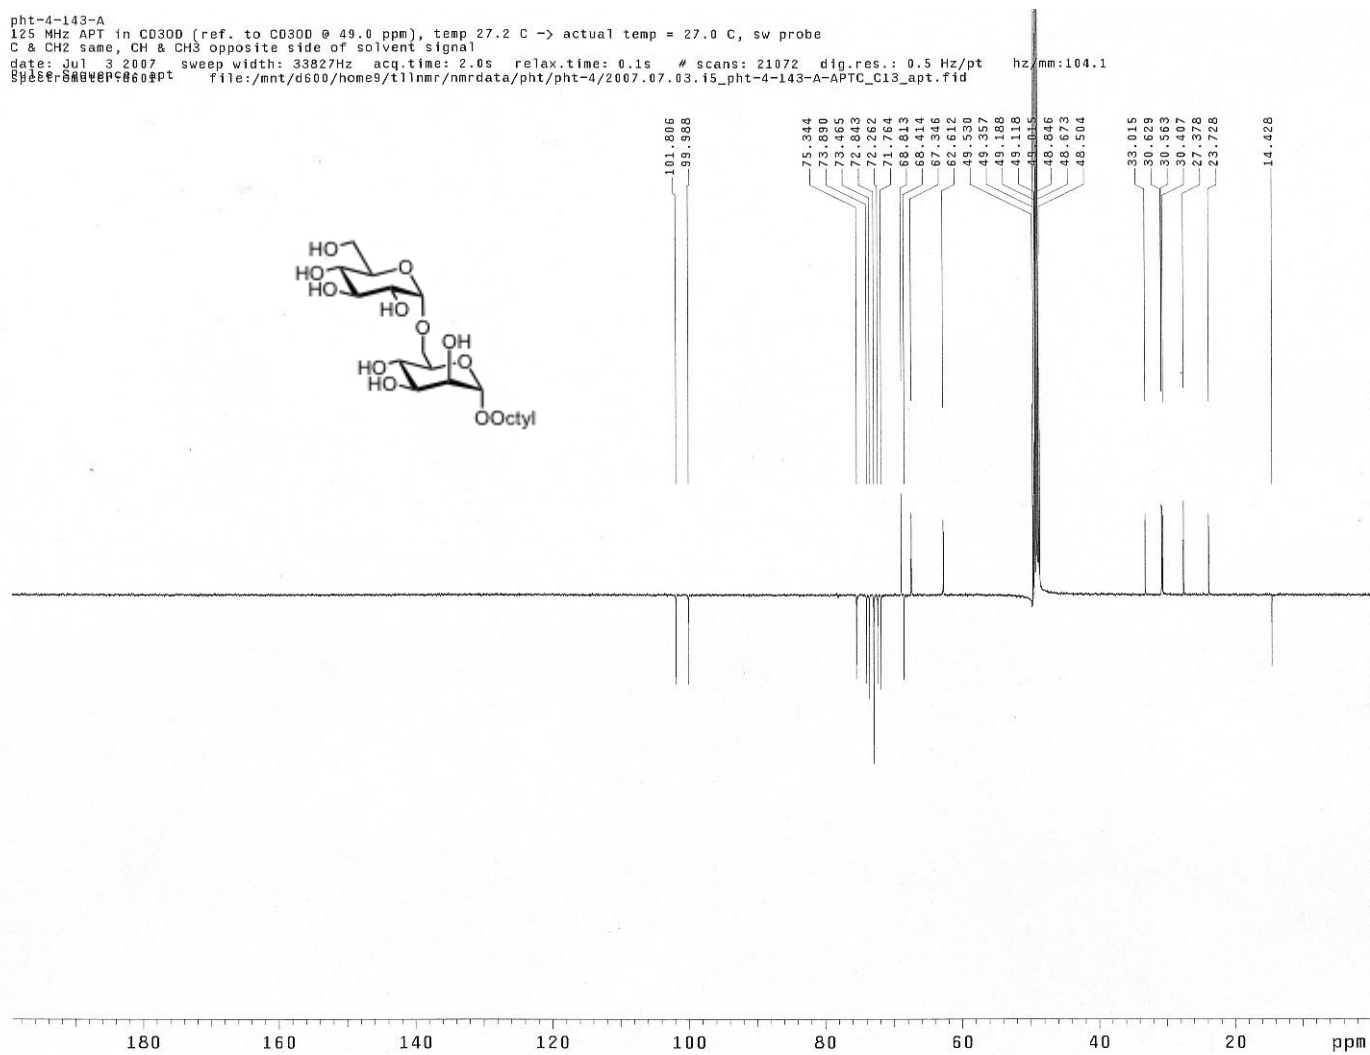

# <sup>1</sup>H NMR spectrum of 4

pht-7-185-A1  
500 MHz 1D in CD3OD (ref. to CD3OD @ 3.30 ppm), temp 27.2 C -> actual temp = 27.0 C, sw500 probe  
Pulse Sequence: s2pul

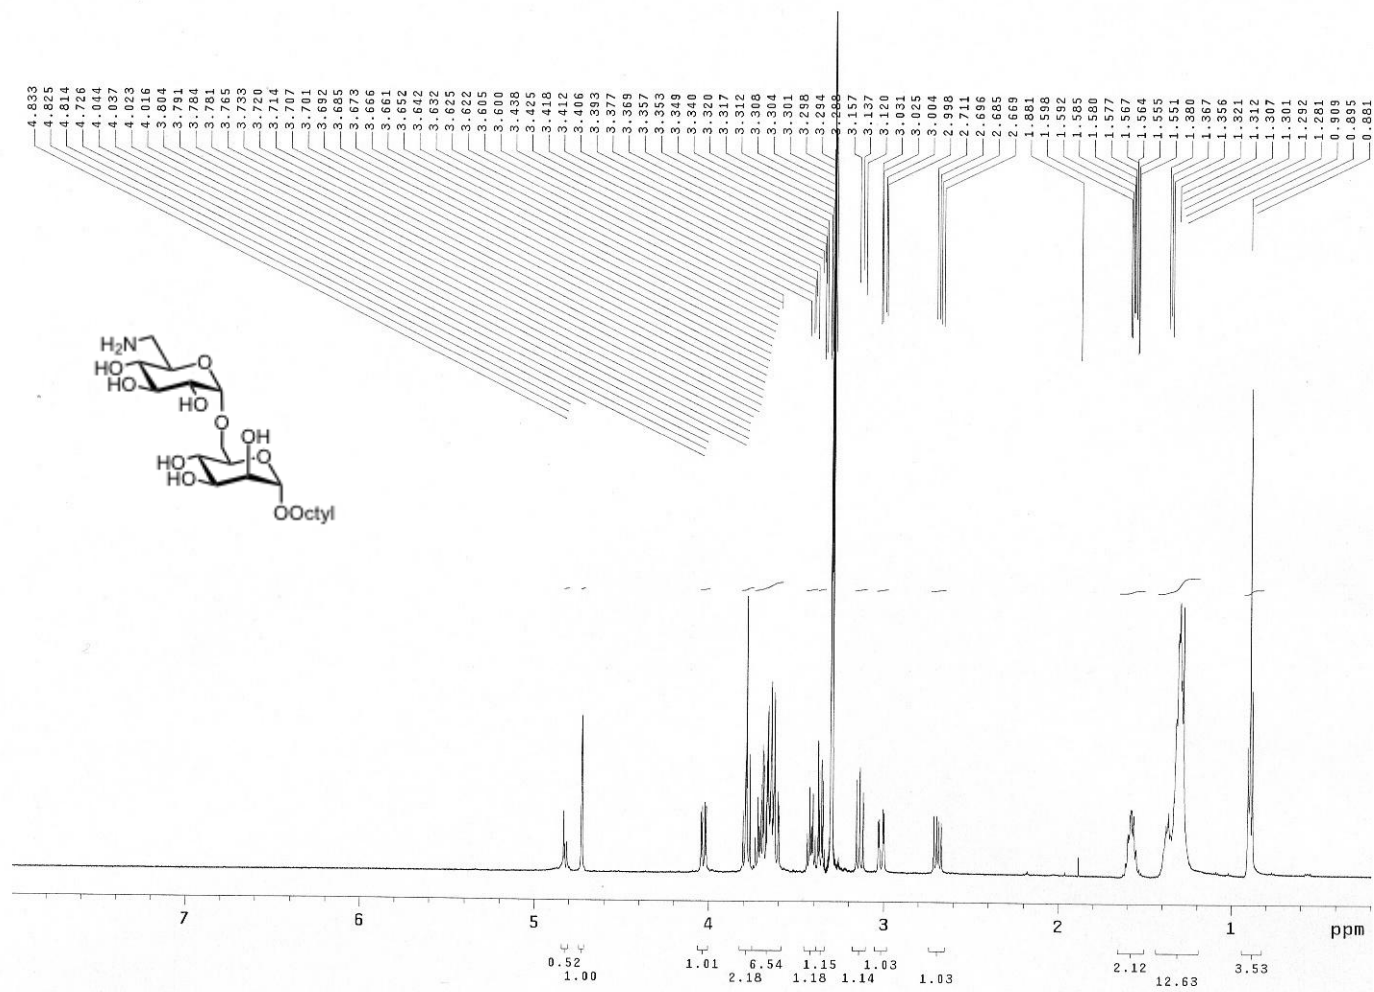

# <sup>13</sup>C NMR spectrum of 4

pht-7-185-A  
125 MHz APT in CD3OD (ref. to CD3OD @ 49.0 ppm), temp 27.2 C -> actual temp = 27.0 C, sw probe  
C & CH2 same, CH & CH3 opposite side of solvent signal  
date: Feb 16 2008 sweep width: 33827Hz acq.time: 2.0s relax.time: 0.1s # scans: 520 dig.res.: 0.5 Hz/pt hz/mm:104.5  
file:/mnt/d600/home9/t11nmr/nmrdata/pht/pht-7/pht-7-185-A2-APT.C.fid

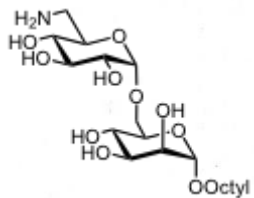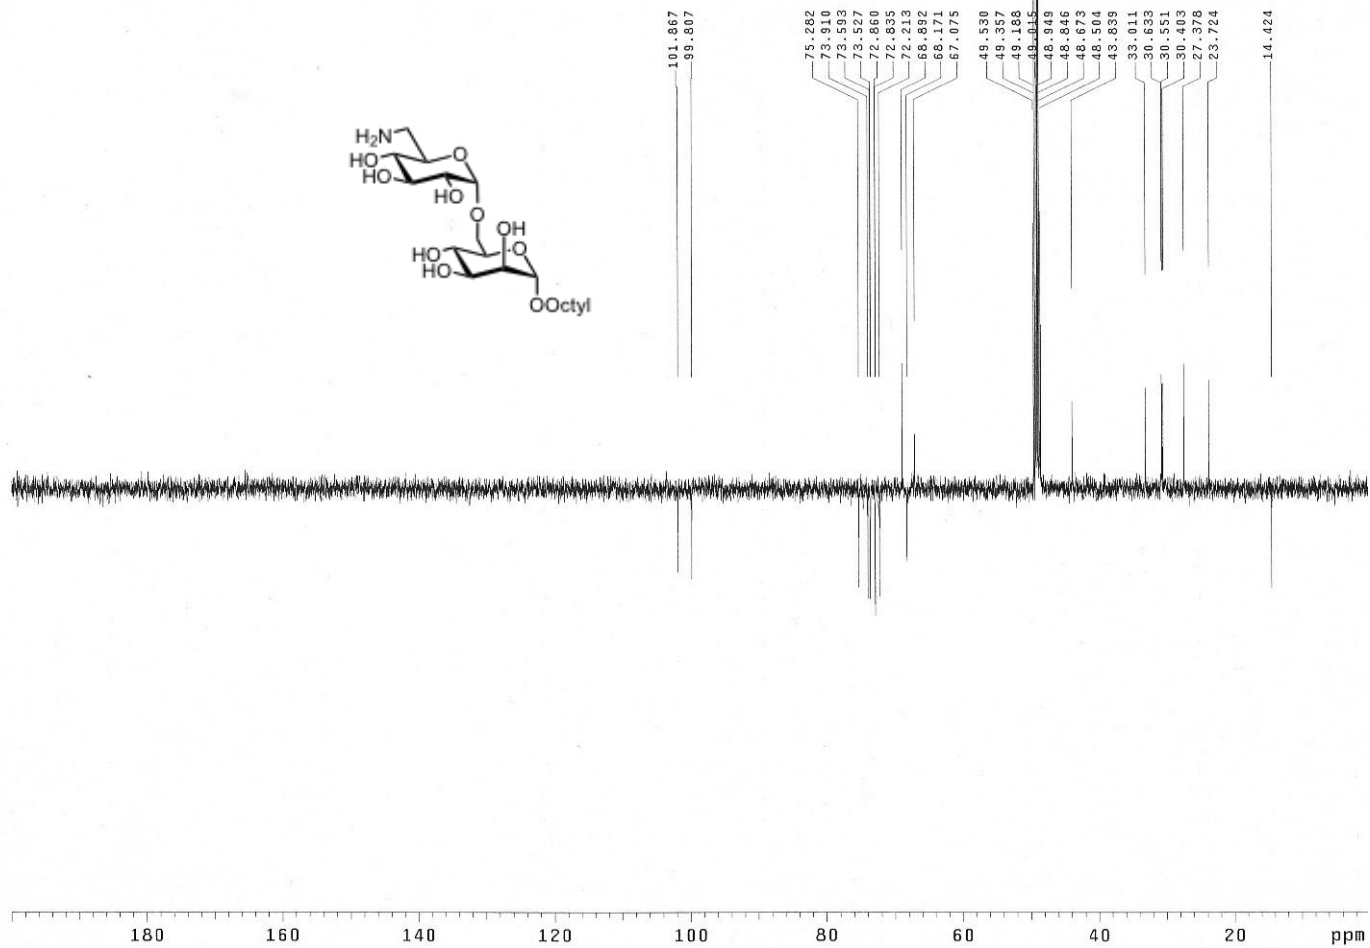

# <sup>1</sup>H NMR spectrum of 5

pht-7-5-A  
600 MHz 1D in CD3OD (ref. to CD3OD @ 3.30 ppm), temp 28.0 C -> actual temp = 27.0 C, id600 probe  
Pulse Sequence: s2pu1

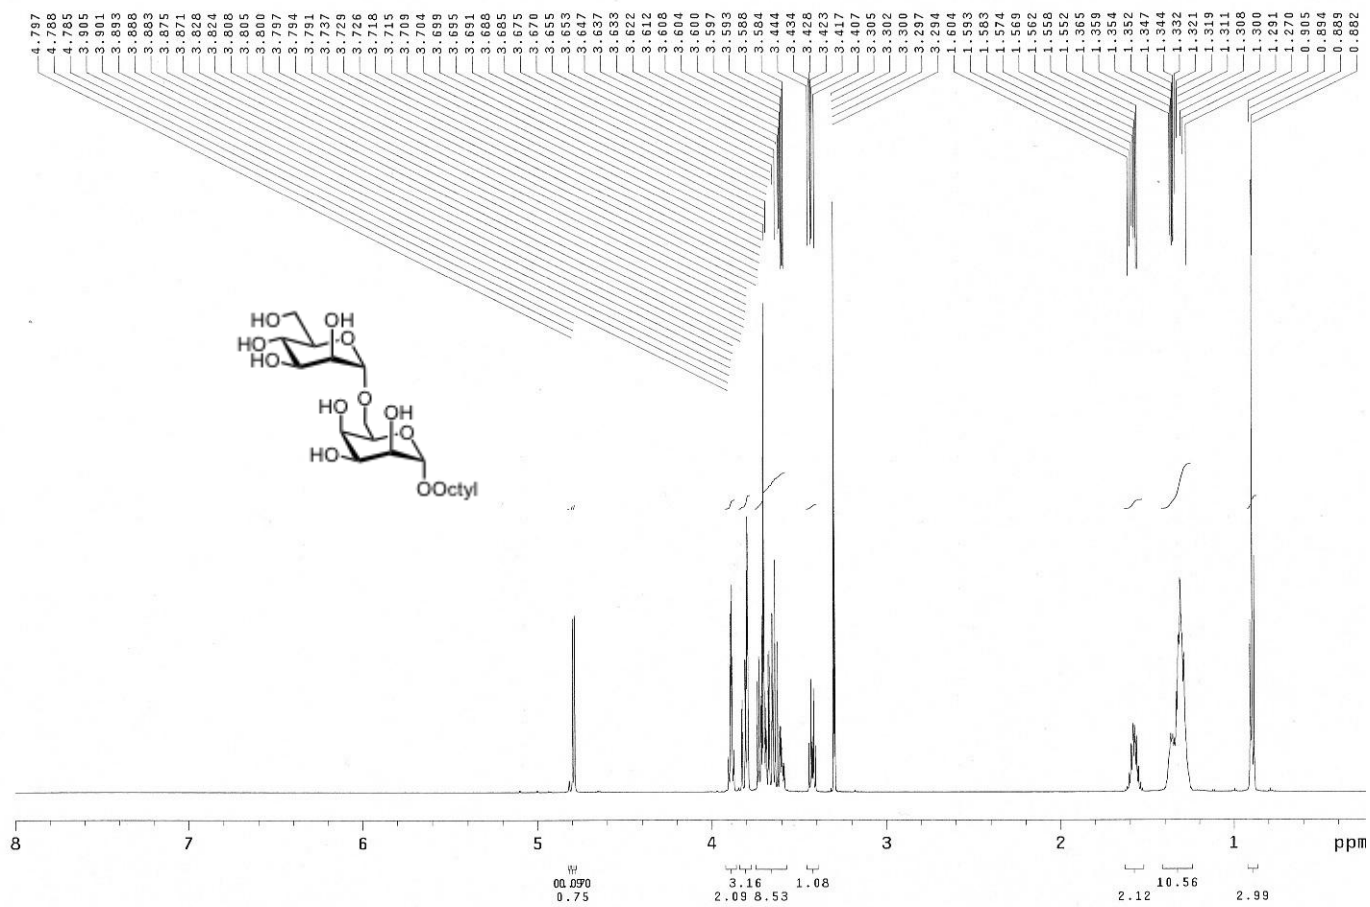



# <sup>1</sup>H NMR spectrum of **6**

pht-7-189-A  
500 MHz 1D in CD3OD (ref. to CD3OD @ 3.30 ppm), temp 27.2 C -> actual temp = 27.0 C, sw500 probe  
Pulse Sequence: s2pu1

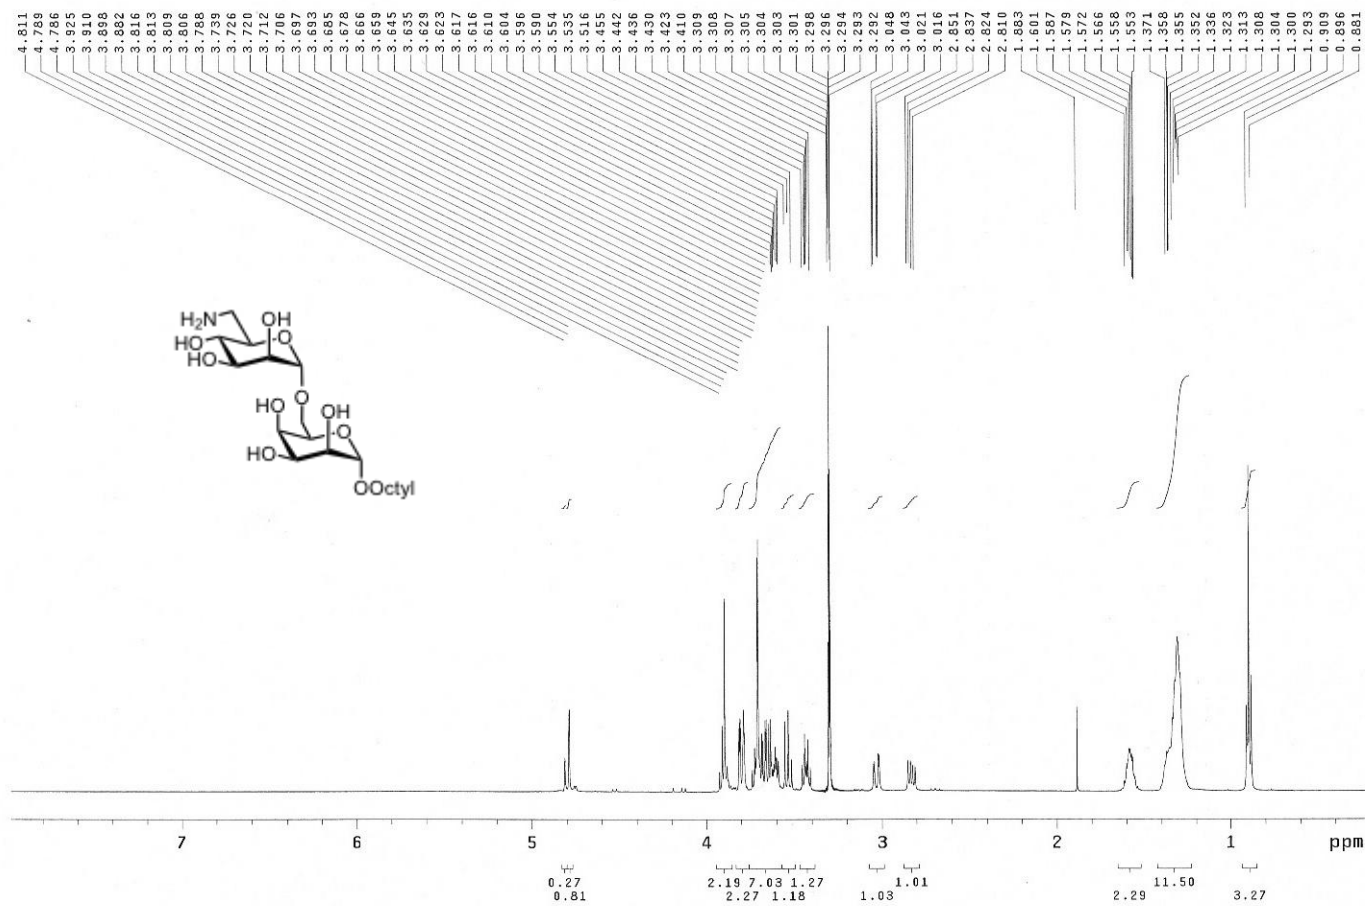

# <sup>13</sup>C NMR spectrum of 6

pht-7-189-A  
125 MHz APT in CD3OD (ref. to CD3OD @ 49.0 ppm), temp 27.2 C -> actual temp = 27.0 C, sw probe  
C & CH2 same, CH & CH3 opposite side of solvent signal  
date: Feb 16 2008 sweep width: 33827Hz acq.time: 2.0s relax.time: 0.1s # scans: 112 dig.res.: 0.5 Hz/pt hz/mm:104.6  
file:/mnt/d600/homes/tlinmr/nmrdata/pht/pht-7/pht-7-189-A-APTC.fid

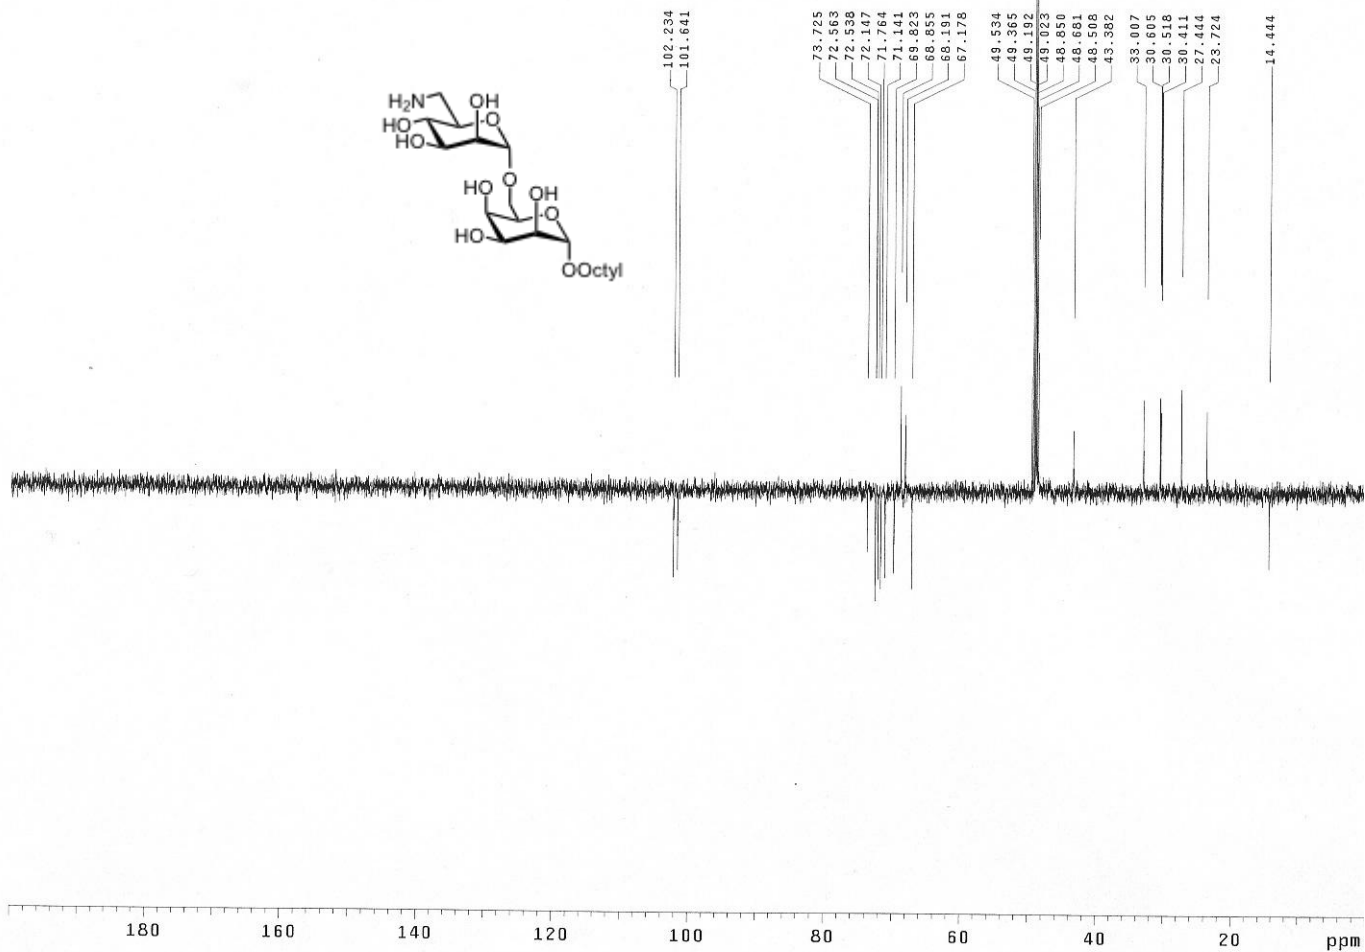

# <sup>1</sup>H NMR spectrum of 7

pht-7-203-A  
600 MHz 1D in CD30D (ref. to CD30D @ 3.30 ppm), temp 28.0 C -> actual temp = 27.0 C, id600 probe  
Pulse Sequence: s2pu1

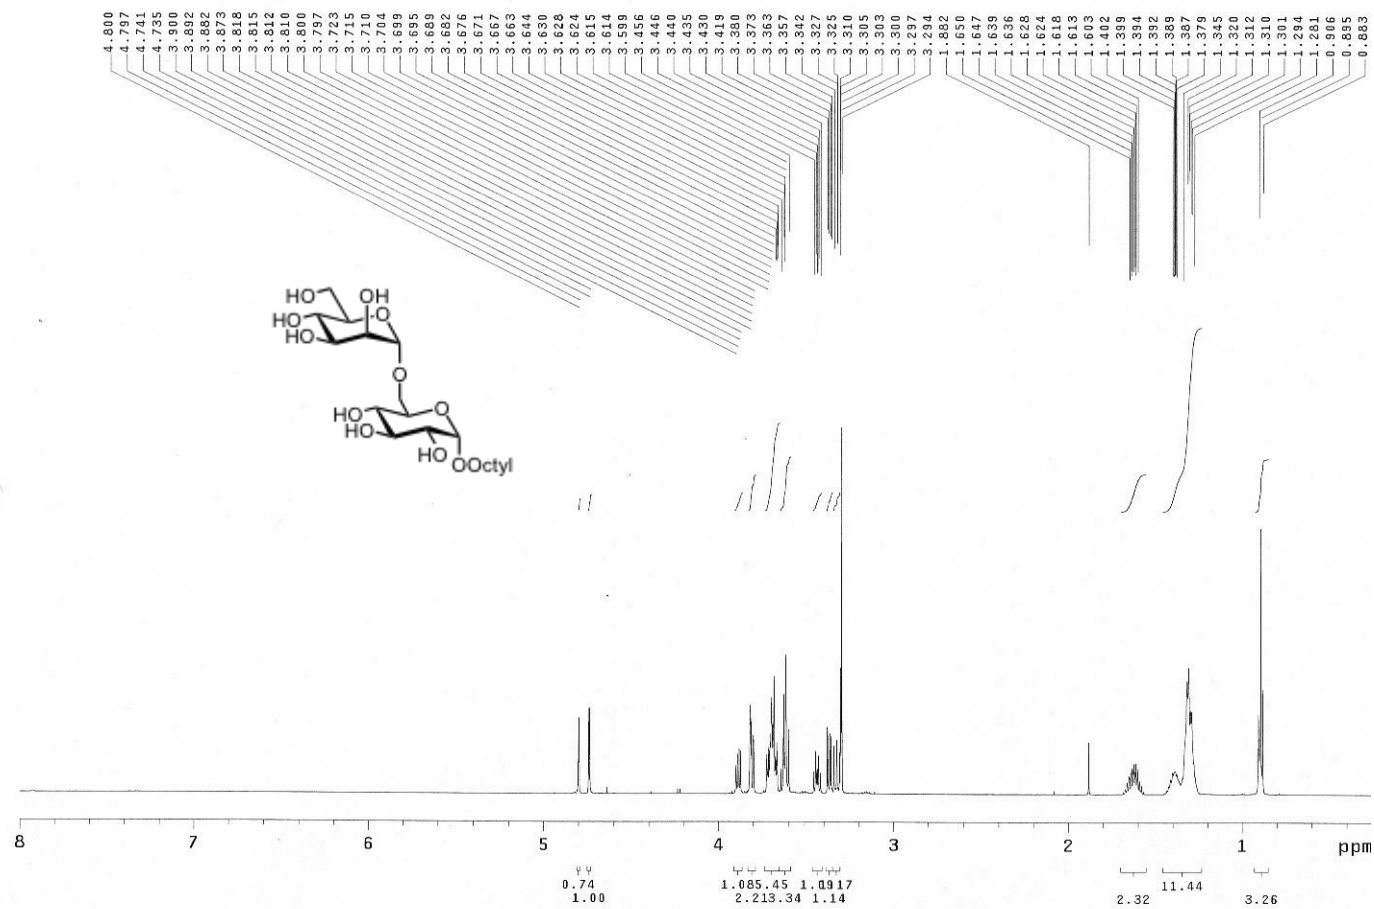



# $^{13}\text{C}$ NMR spectrum of 7

pht-7-203-A  
125 MHz APT in CD3OD (ref. to CD3OD @ 49.0 ppm), temp 27.2 C -> actual temp = 27.0 C, sw probe  
C & CH2 same, CH & CH3 opposite side of solvent signal  
date: Apr 7 2008 sweep width: 33827Hz acq.time: 2.0s relax.time: 0.1s # scans: 112 dig.res.: 0.5 Hz/pt hz/mm:104.4  
file:/mnt/d500/home9/t11nmr/nmrdata/pht/pht-7/pht-7-203-A-APT.C.fid

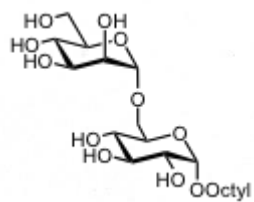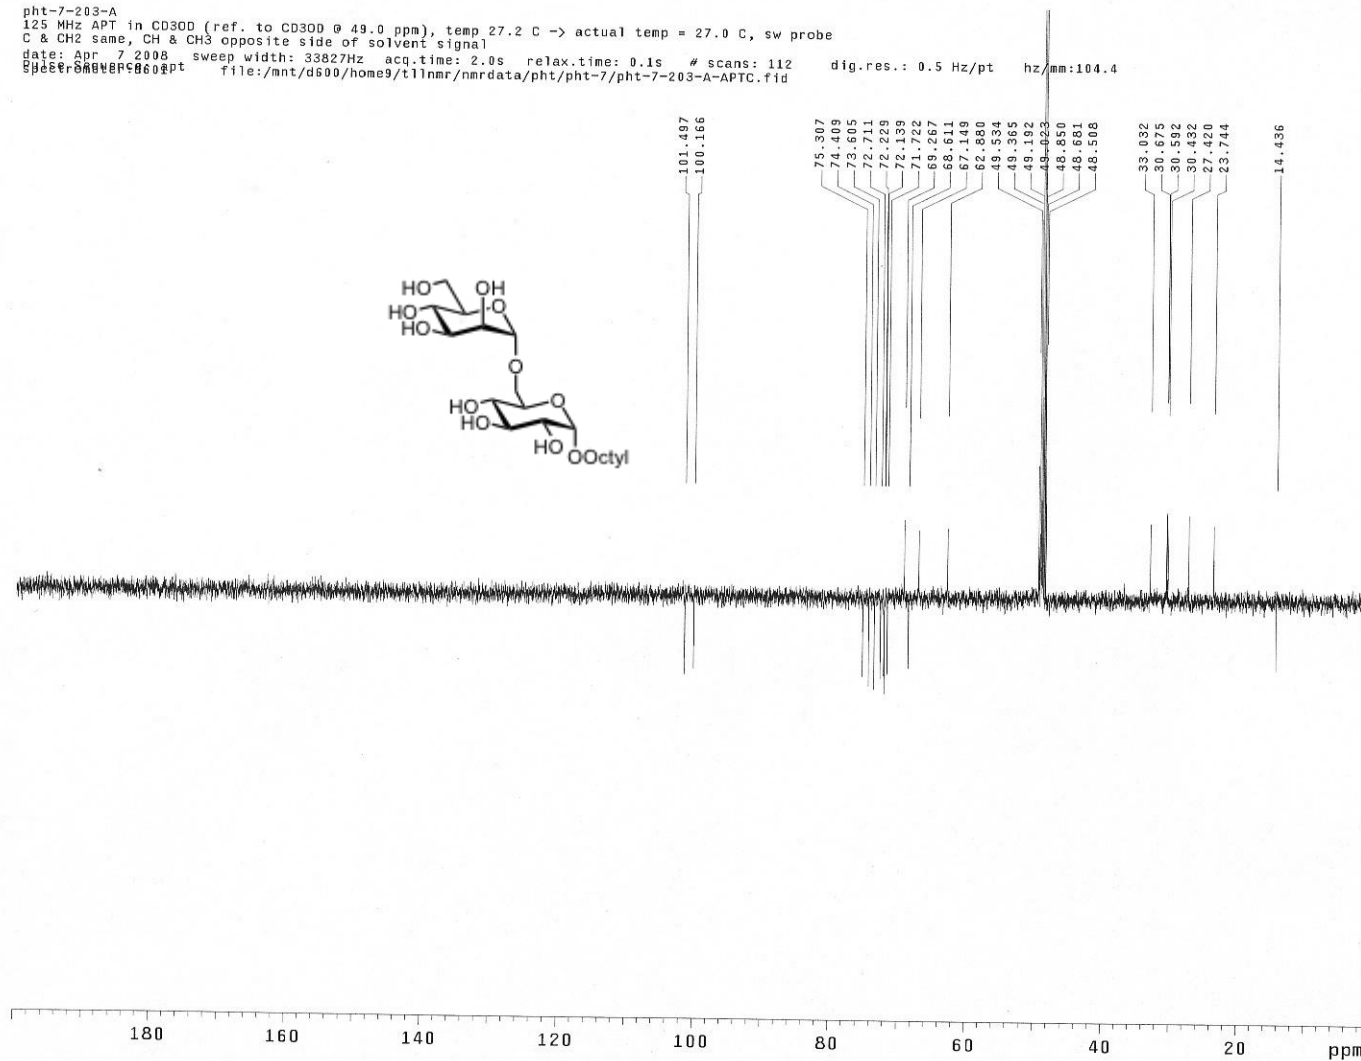

# <sup>1</sup>H NMR spectrum of **8**

pht-7-199-A  
600 MHz 1D 1n CD3OD (ref. to CD3OD @ 3.30 ppm), temp 28.0 C -> actual temp = 27.0 C, id600 probe  
Pulse Sequence: s2pu1

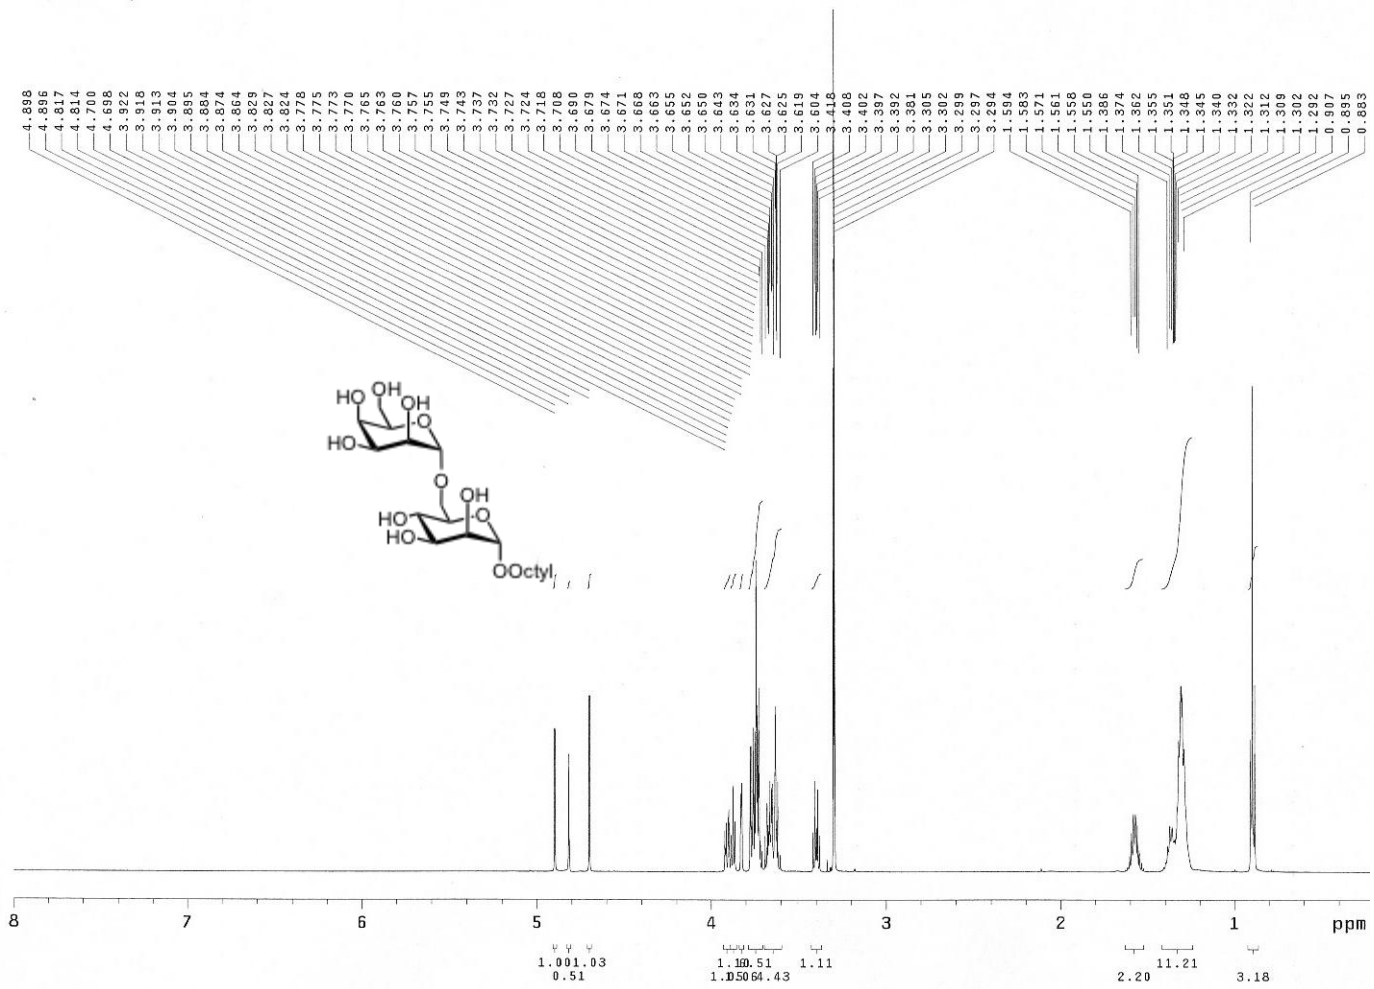

# <sup>13</sup>C NMR spectrum of 8

pht-7-199-A  
125 MHz APT in CD3OD (ref. to CD3OD @ 49.0 ppm), temp 27.2 C -> actual temp = 27.0 C, sw probe  
C & CH2 same, CH & CH3 opposite side of solvent signal  
Date: Apr 2 2008 sweep width: 33827Hz acq.time: 2.0s relax.time: 0.1s # scans: 1288 dig.res.: 0.5 Hz/pt hz/mm:104.3  
File: /mnt/d600/home9/t11nmr/nmrdata/pht/pht-7/pht-7-199-A-APT.C.fid

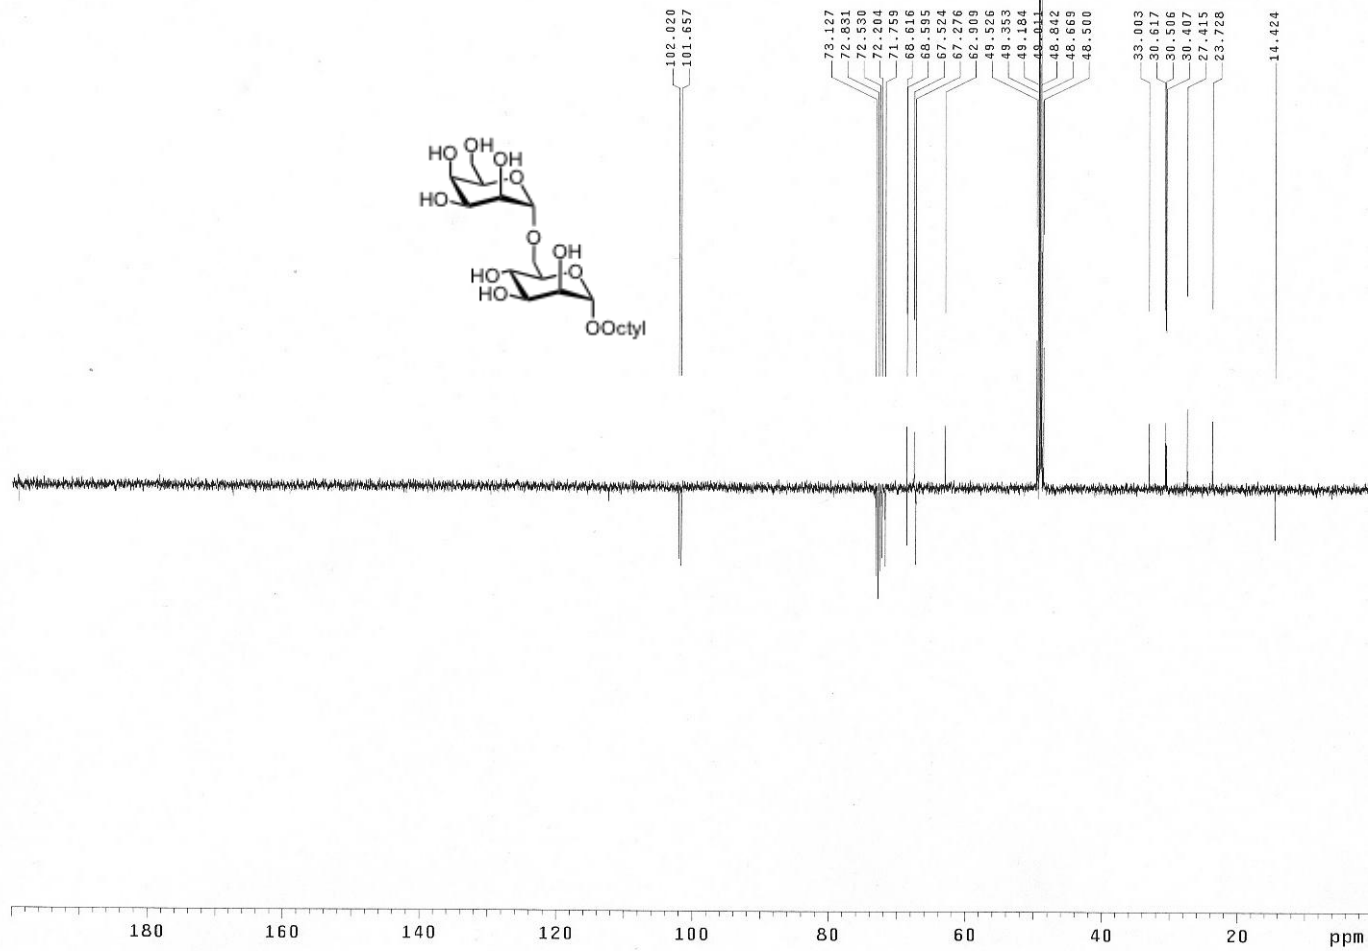

# <sup>1</sup>H NMR spectrum of **9**

pht-7-205-A  
500 MHz 1D in CD300 (ref. to CD300 @ 3.30 ppm), temp 26.1 C -> actual temp = 27.0 C, autotxdb probe  
Pulse Sequence: presat

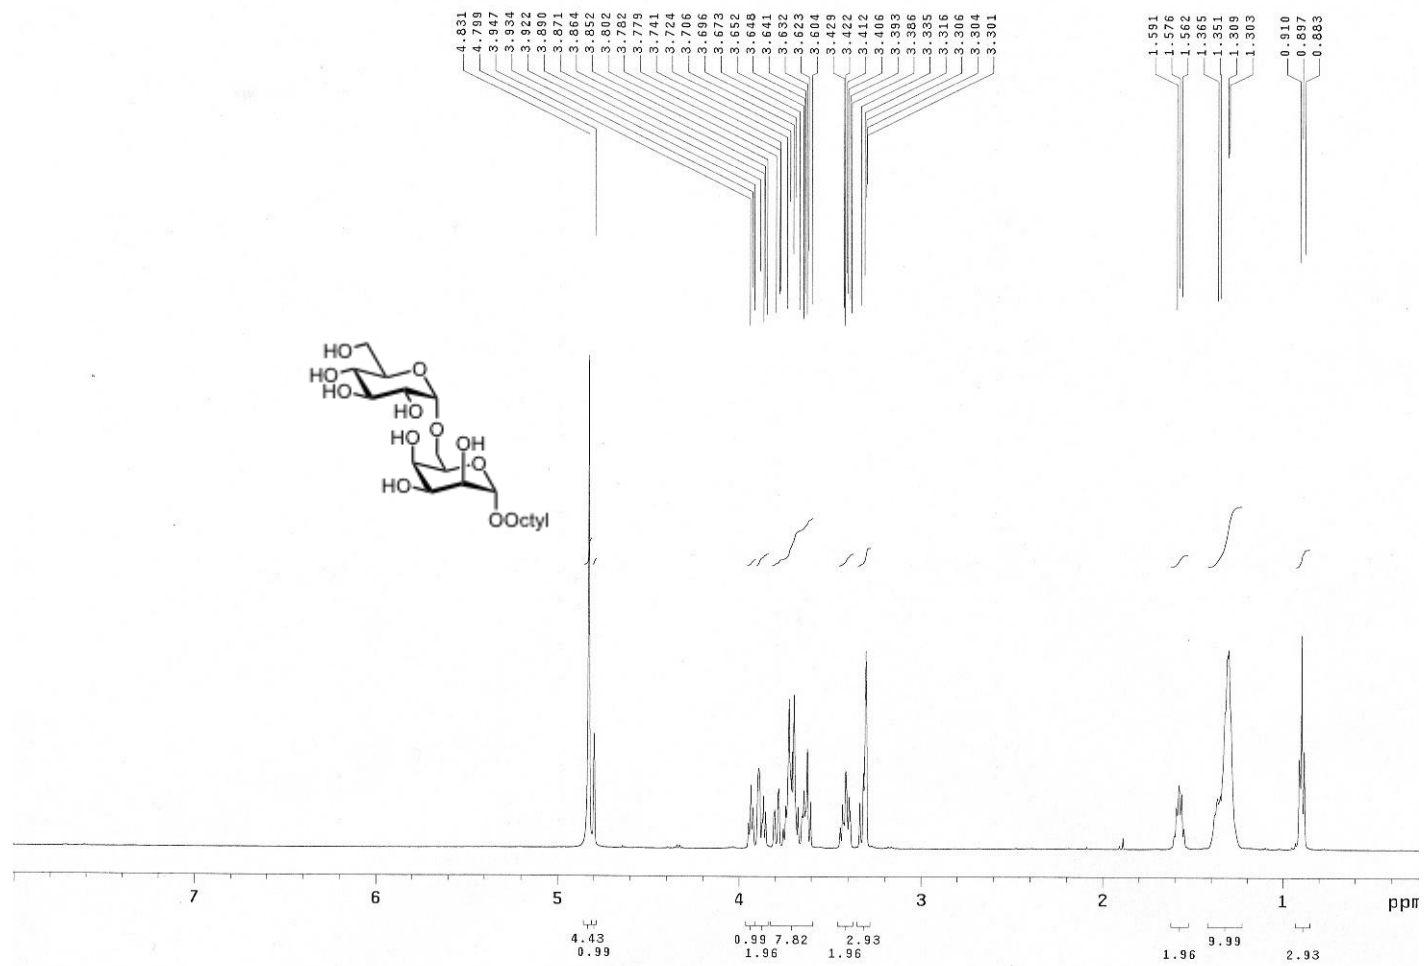

# $^{13}\text{C}$ NMR spectrum of **9**

pht-7-205-A  
125 MHz APT in CD300 (ref. to CD300 @ 49.0 ppm), temp 26.1 C -> actual temp = 27.0 C, autotdb probe  
C & CH2 same, CH & CH3 opposite side of solvent signal  
date: Apr 10 2008 sweep width: 33784Hz acq.time: 2.0s relax.time: 0.1s # scans: 1464 dig.res.: 0.5 Hz/pt hz/mm:104.6  
file:/mnt/d600/home9/t11nmr/nmrdata/pht/pht-7/pht-7-205-A-APTC.fid

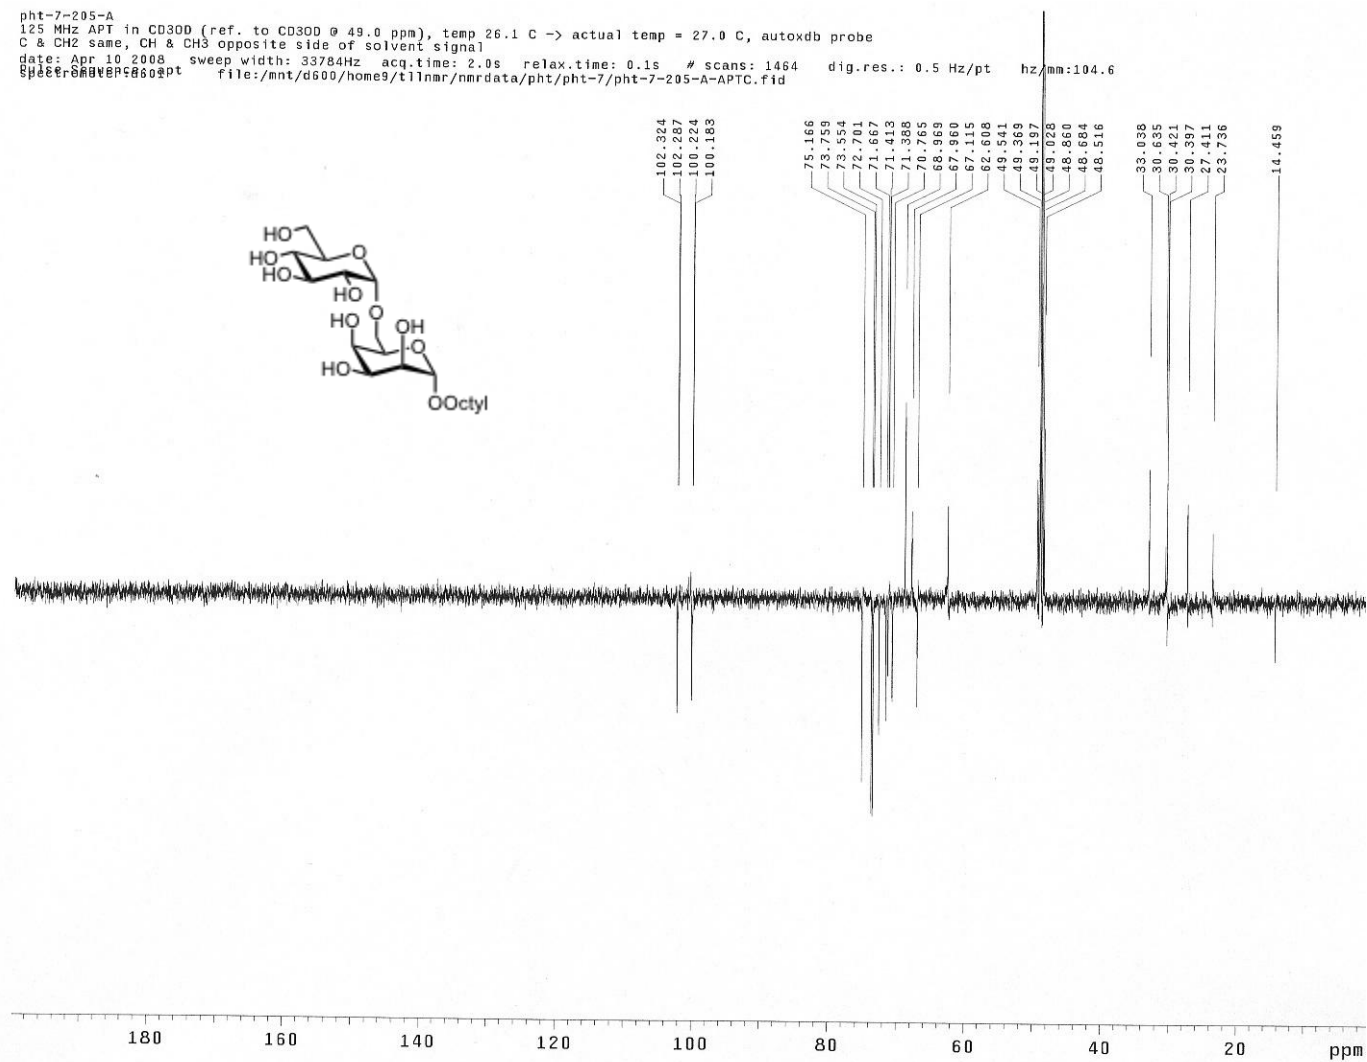

# $^1\text{H}$ NMR spectrum of **13**

pht-4-183-A  
600 MHz 1D in CDCl<sub>3</sub> (ref. to CDCl<sub>3</sub> @ 7.26 ppm), temp 28.0 C -> actual temp = 27.0 C, id600 probe  
Pulse Sequence: s2pu1

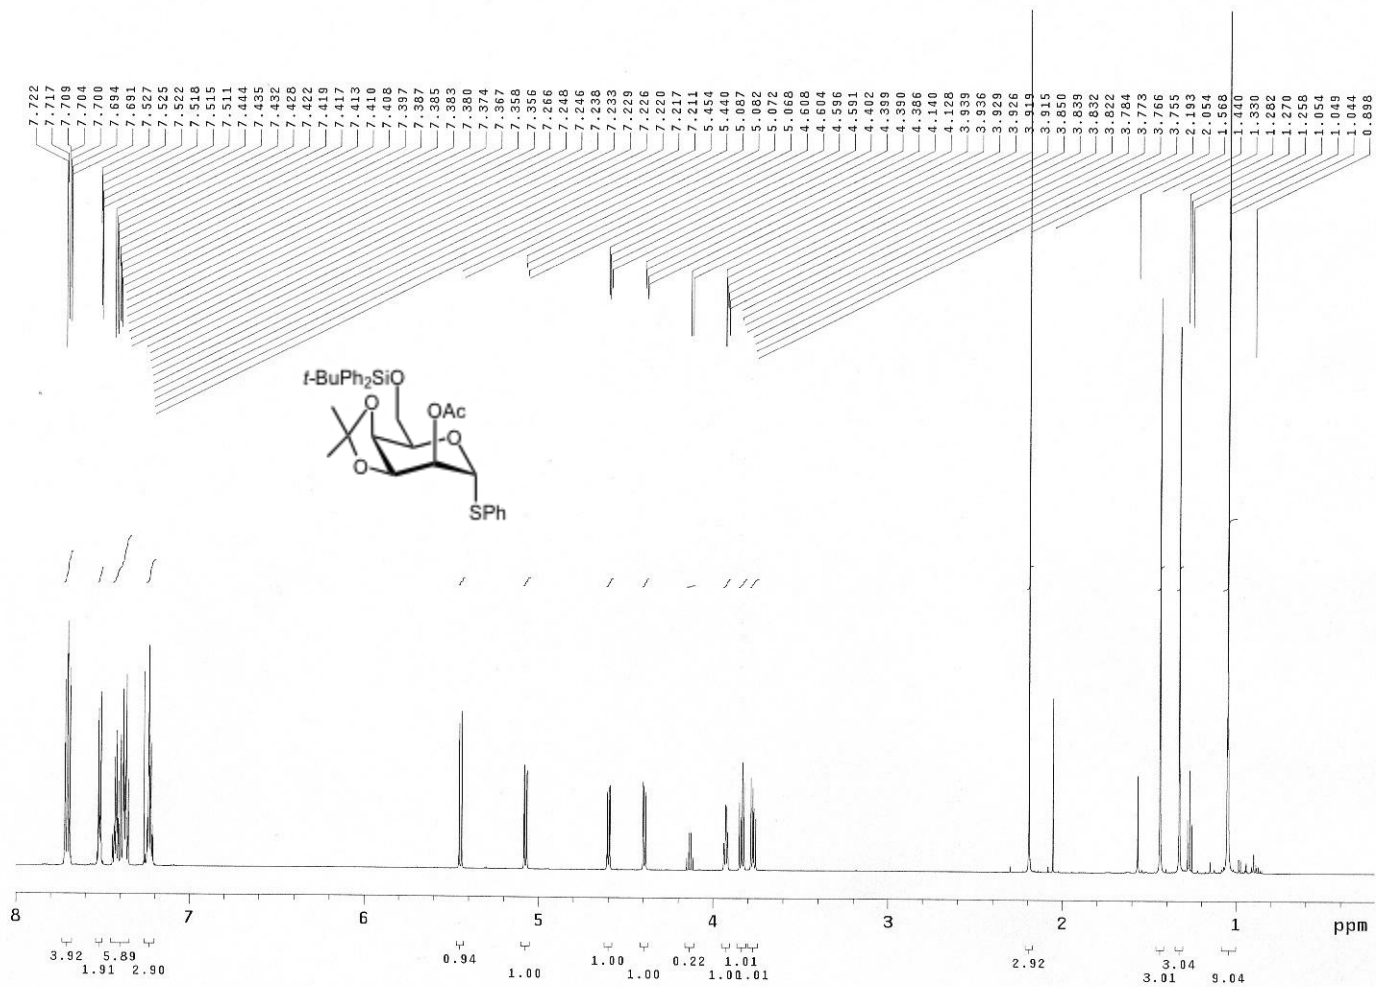

# $^{13}\text{C}$ NMR spectrum of **13**

pht-4-183-A  
600 MHz 1D in CDCl<sub>3</sub> (ref. to CDCl<sub>3</sub> @ 7.26 ppm), temp 28.0 C -> actual temp = 27.0 C, id600 probe  
Pulse Sequence: s2pu1

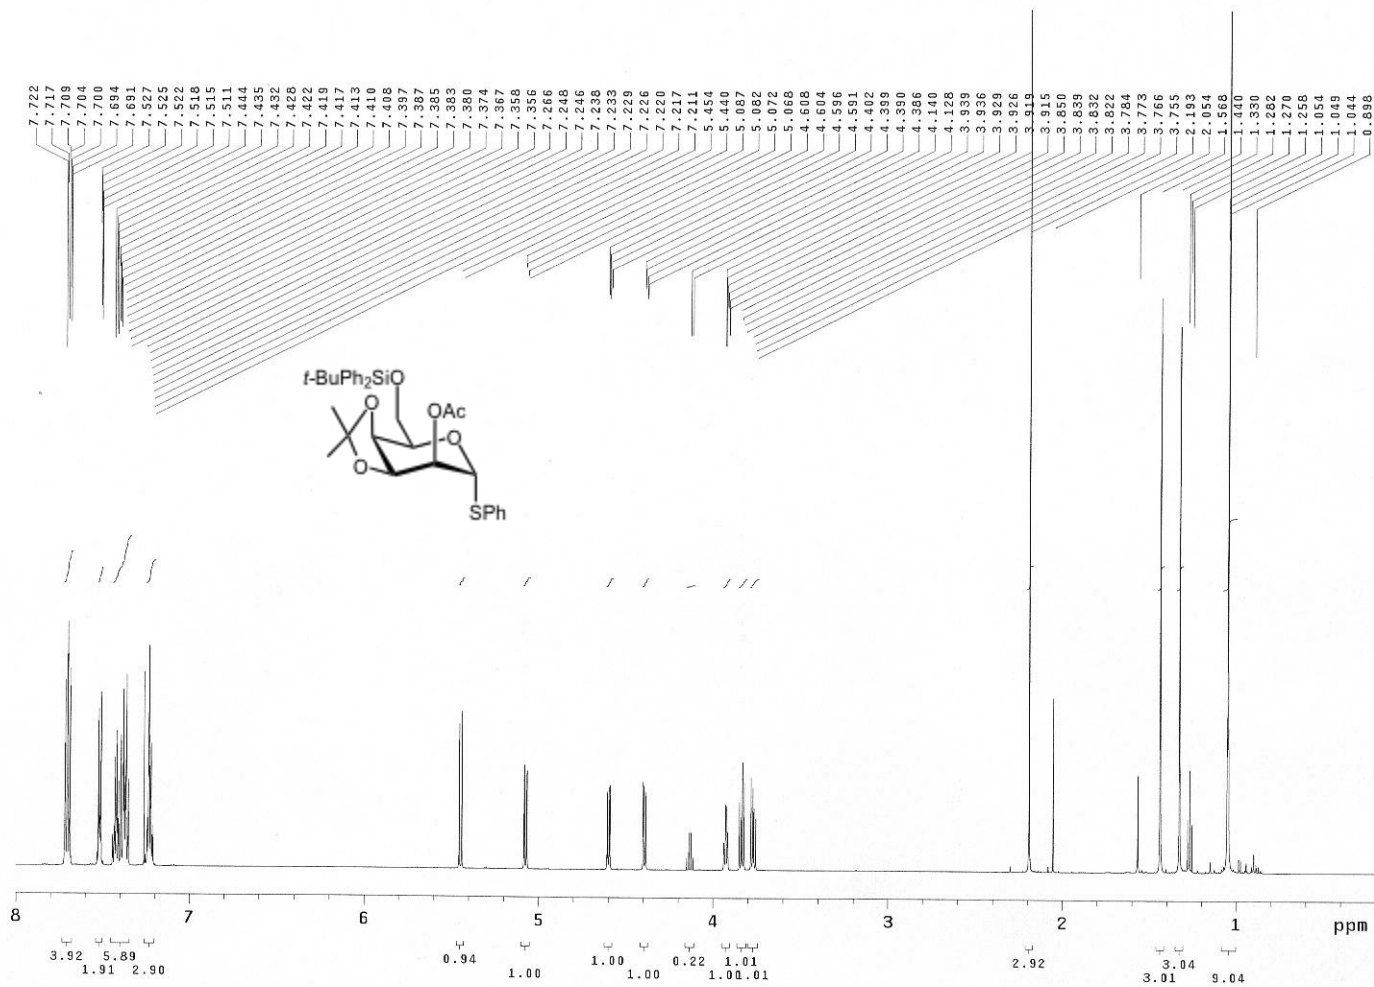

# <sup>1</sup>H NMR spectrum of **14**

pht-4-205-A  
500 MHz 1D in CDCl<sub>3</sub> (ref. to CDCl<sub>3</sub> @ 7.26 ppm), temp 27.2 C -> actual temp = 27.0 C, sw500 probe  
Pulse Sequence: s2pu1

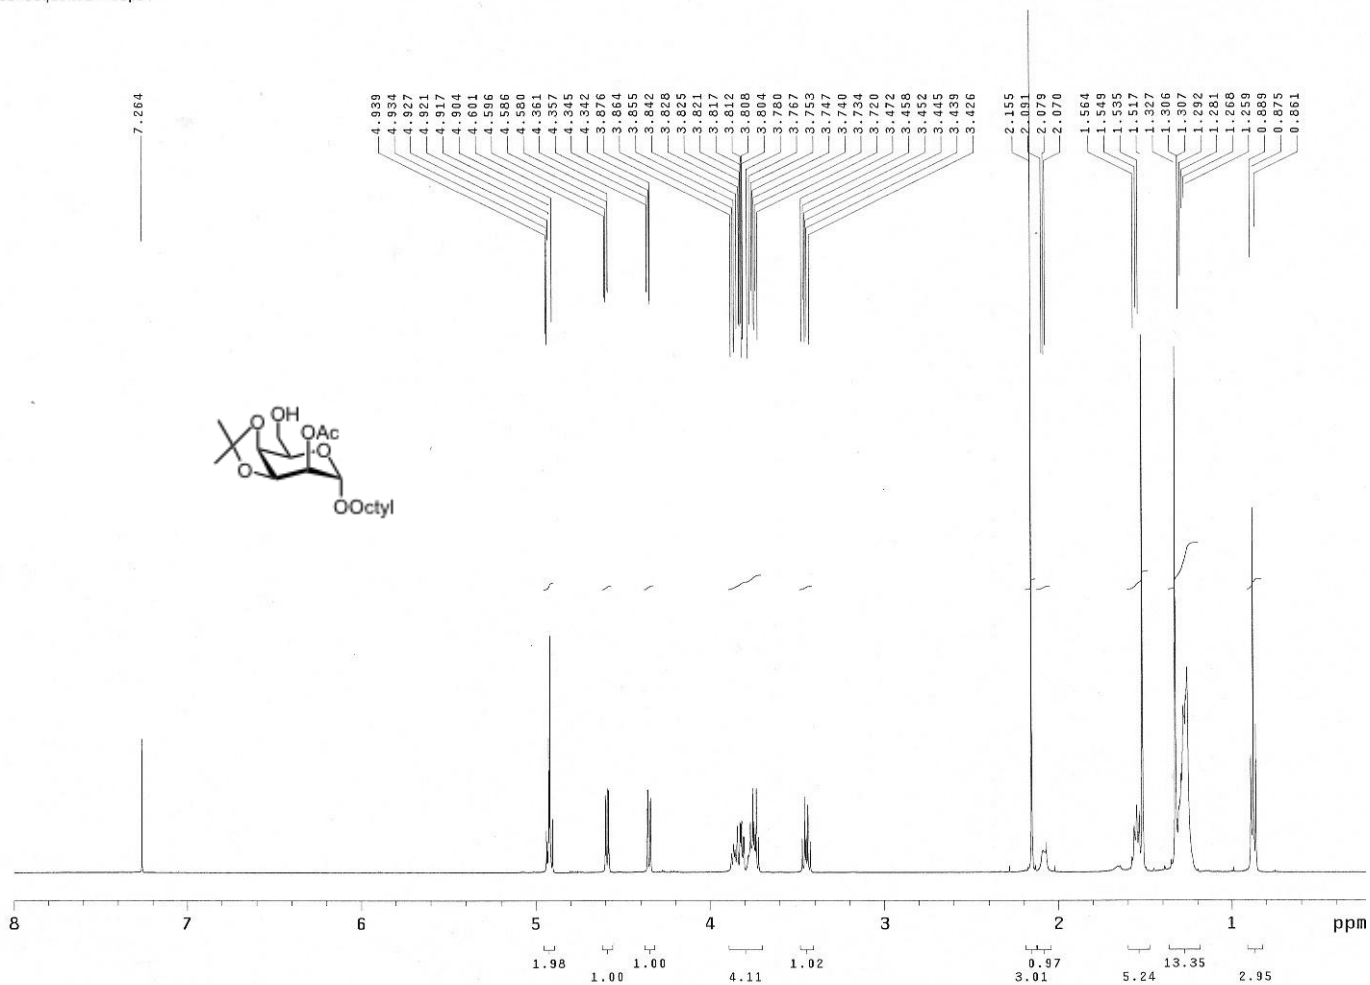



# <sup>13</sup>C NMR spectrum of **14**

pht-4-205-A  
125 MHz APT in CDCl<sub>3</sub> (ref. to CDCl<sub>3</sub> @ 77.0 ppm), temp 27.2 C -> actual temp = 27.0 C, sw probe  
C & CH<sub>2</sub> same, CH & CH<sub>3</sub> opposite side of solvent signal  
date: Aug 18 2007 sweep width: 33827Hz acq.time: 2.0s relax.time: 0.1s # scans: 96 dig.res.: 0.5 Hz/pt hz/mm:104.3  
Spee: 880V8P48601Pt file:/mnt/d500/home9/t11nmr/nmrdata/pht/pht-4/pht-4-205-A-APT.fid

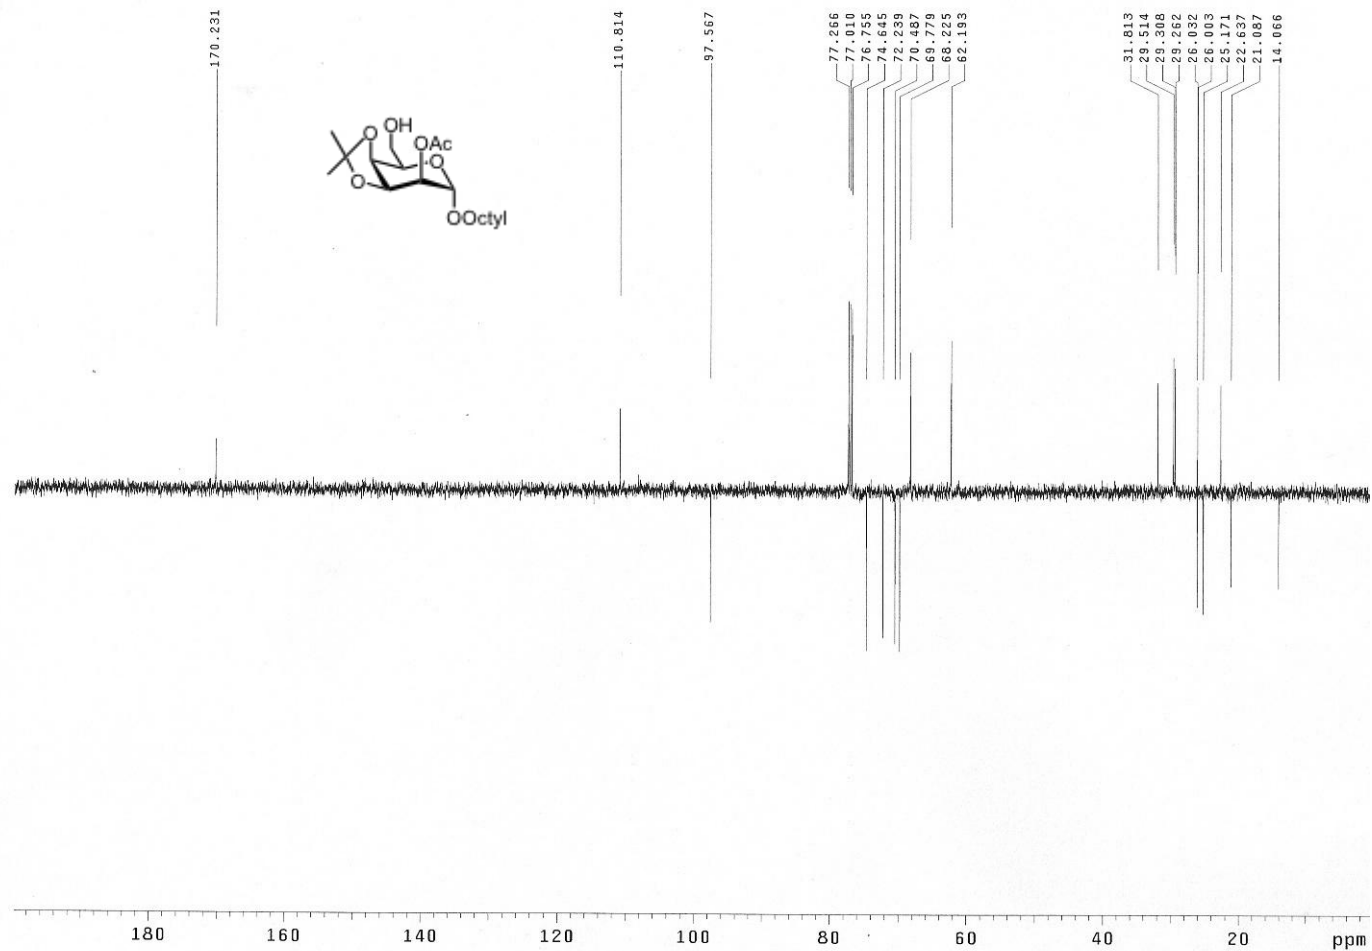

# <sup>1</sup>H NMR spectrum of **15**

pht-4-115-A  
500 MHz 1D in CDCl<sub>3</sub> (ref. to CDCl<sub>3</sub> @ 7.26 ppm), temp 27.2 C → actual temp = 27.0 C, sw500 probe

Pulse Sequence: s2pu1

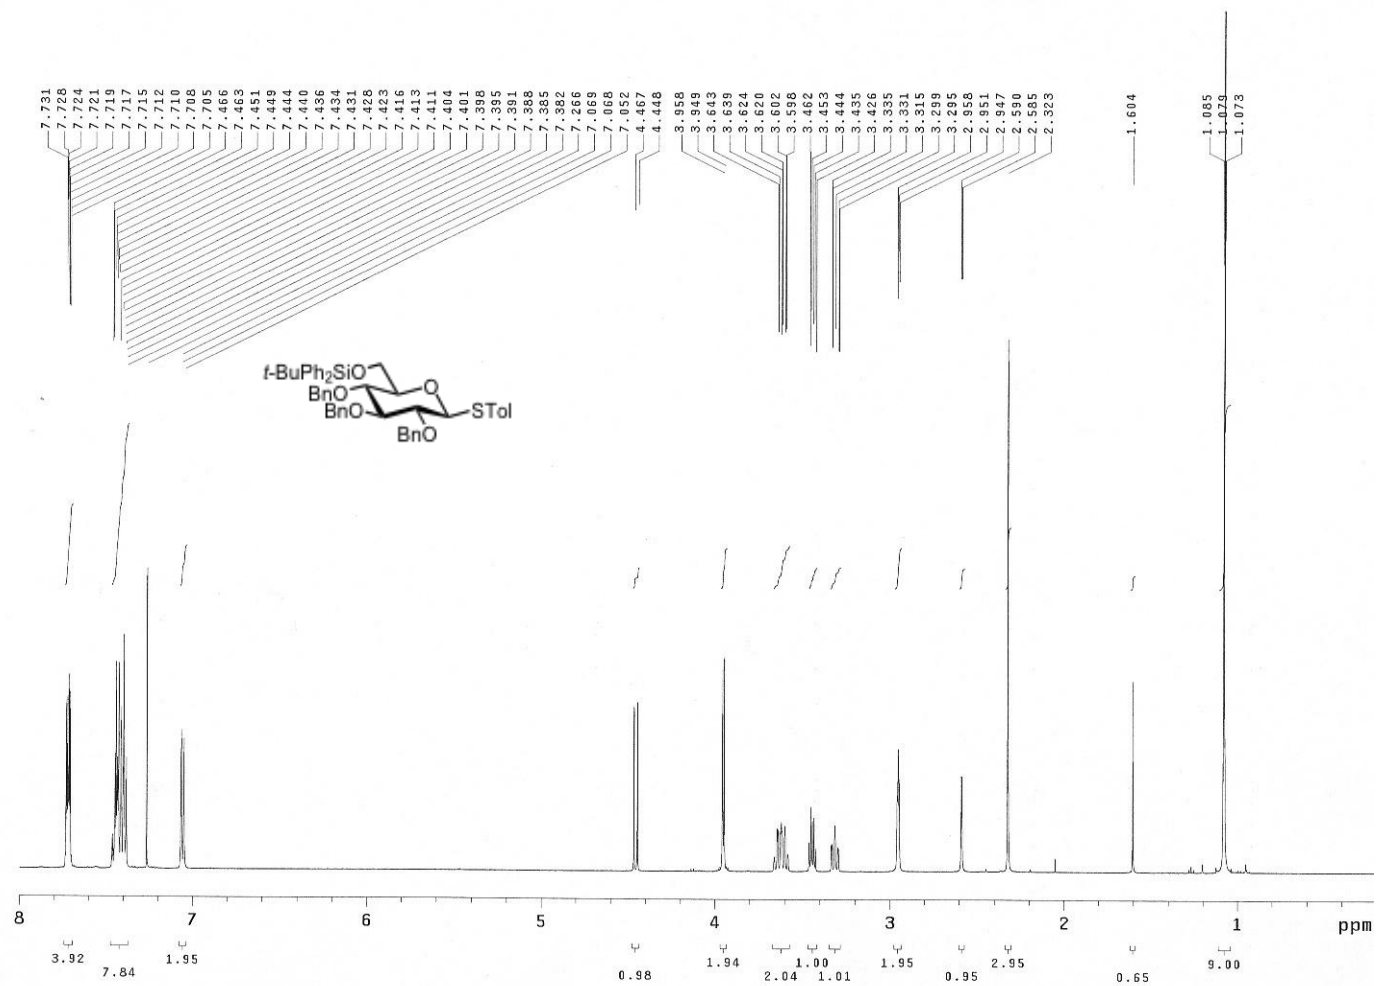

# <sup>13</sup>C NMR spectrum of **15**

pht-4-115-A  
100 MHz APT in CDCl<sub>3</sub> (ref. to CDCl<sub>3</sub> @ 77.0 ppm), temp 26.8 C -> actual temp = 27.0 C, asw400 probe  
C & CH<sub>2</sub> same, CH & CH<sub>3</sub> opposite side of solvent signal  
date: Jun 7 2007 sweep width: 26954Hz acq.time: 2.0s relax.time: 0.1s # scans: 216 dig.res.: 0.4 Hz/pt hz/mm:83.5  
file:/mnt/d600/home9/t11nmr/nmrdata/pht/pht-4/pht-4-115-A-APT.C.fid

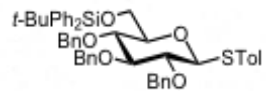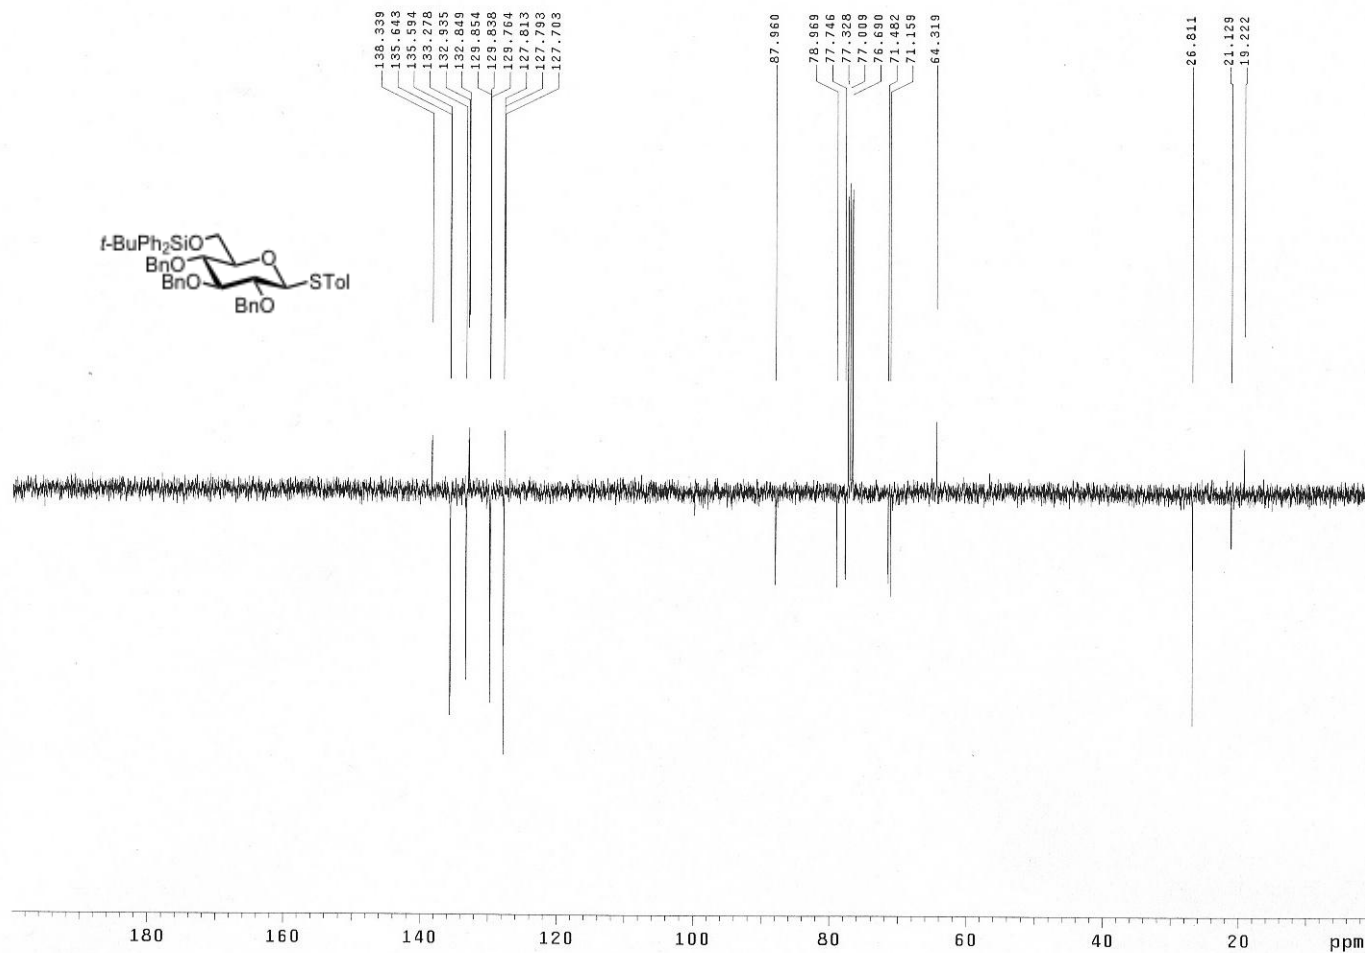

# $^1\text{H}$ NMR spectrum of **18**

pht-4-149-A  
500 MHz 1D in  $\text{CDCl}_3$  (ref. to  $\text{CDCl}_3$  @ 7.26 ppm), temp 27.2 C -> actual temp = 27.0 C, sw500 probe  
Pulse Sequence: s2pu1

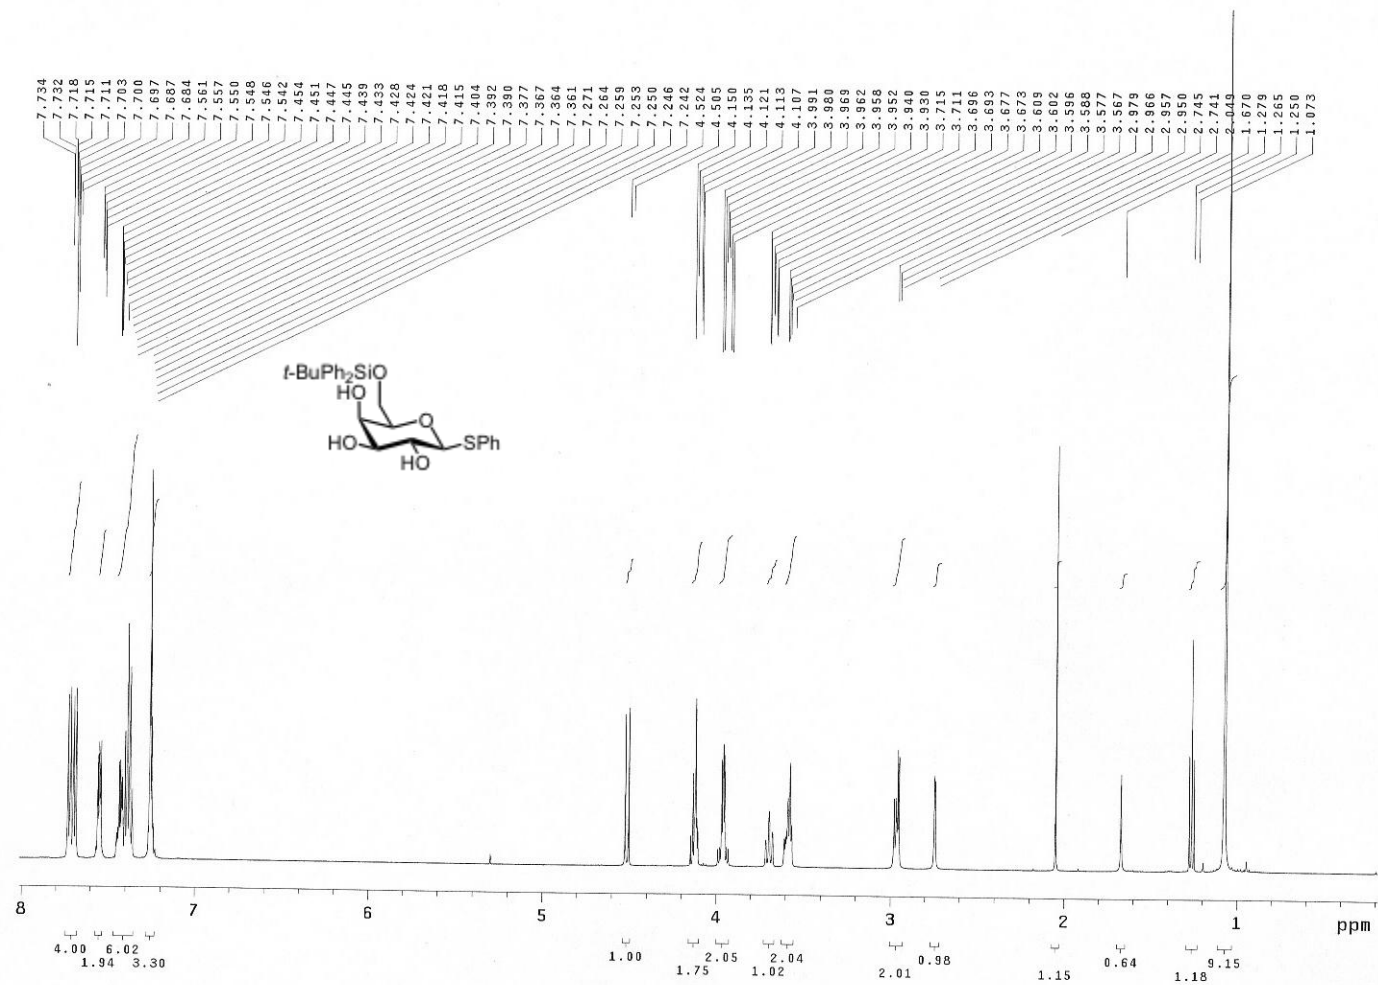

# <sup>13</sup>C NMR spectrum of **18**

pht-4-149-A  
125 MHz APT in CDCl<sub>3</sub> (ref. to CDCl<sub>3</sub> @ 77.0 ppm), temp 27.2 C -> actual temp = 27.0 C, sw probe  
C & CH2 same, CH & CH3 opposite side of solvent signal  
date: Jul 4 2007 sweep width: 33827Hz acq.time: 2.0s relax.time: 0.1s # scans: 216 dig.res.: 0.5 Hz/pt hz/mm:104.3  
file:/mnt/d600/home9/t11nmr/nmrdata/pht/pht-4/pht-4-149-A-APT.C.fid

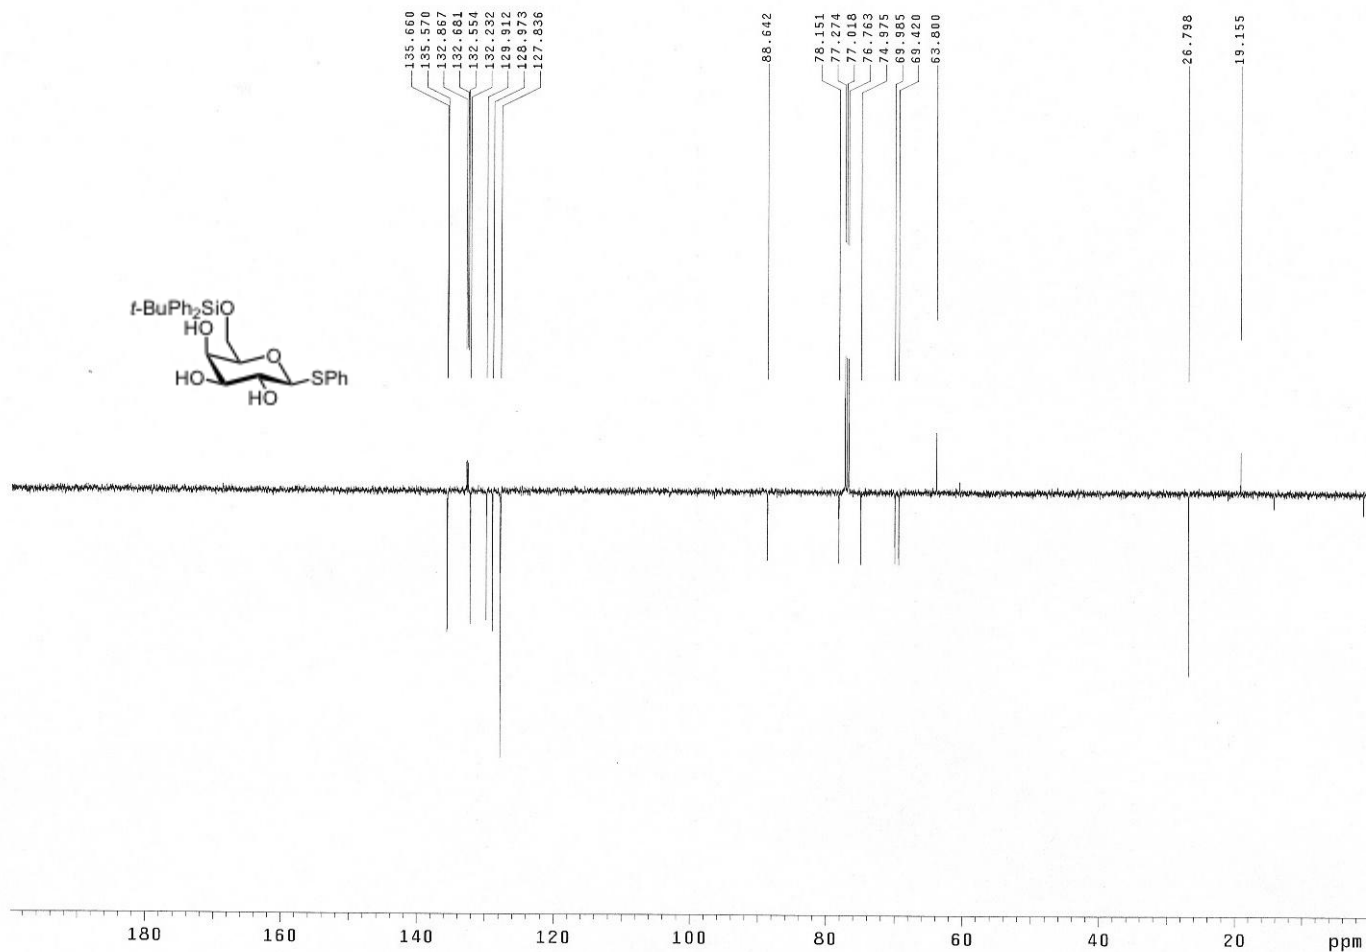

# <sup>1</sup>H NMR spectrum of **19**

pht-4-153-A  
500 MHz 1D in CDCl<sub>3</sub> (ref. to CDCl<sub>3</sub> @ 7.26 ppm), temp 27.2 C -> actual temp = 27.0 C, sw500 probe

Pulse Sequence: s2pu1

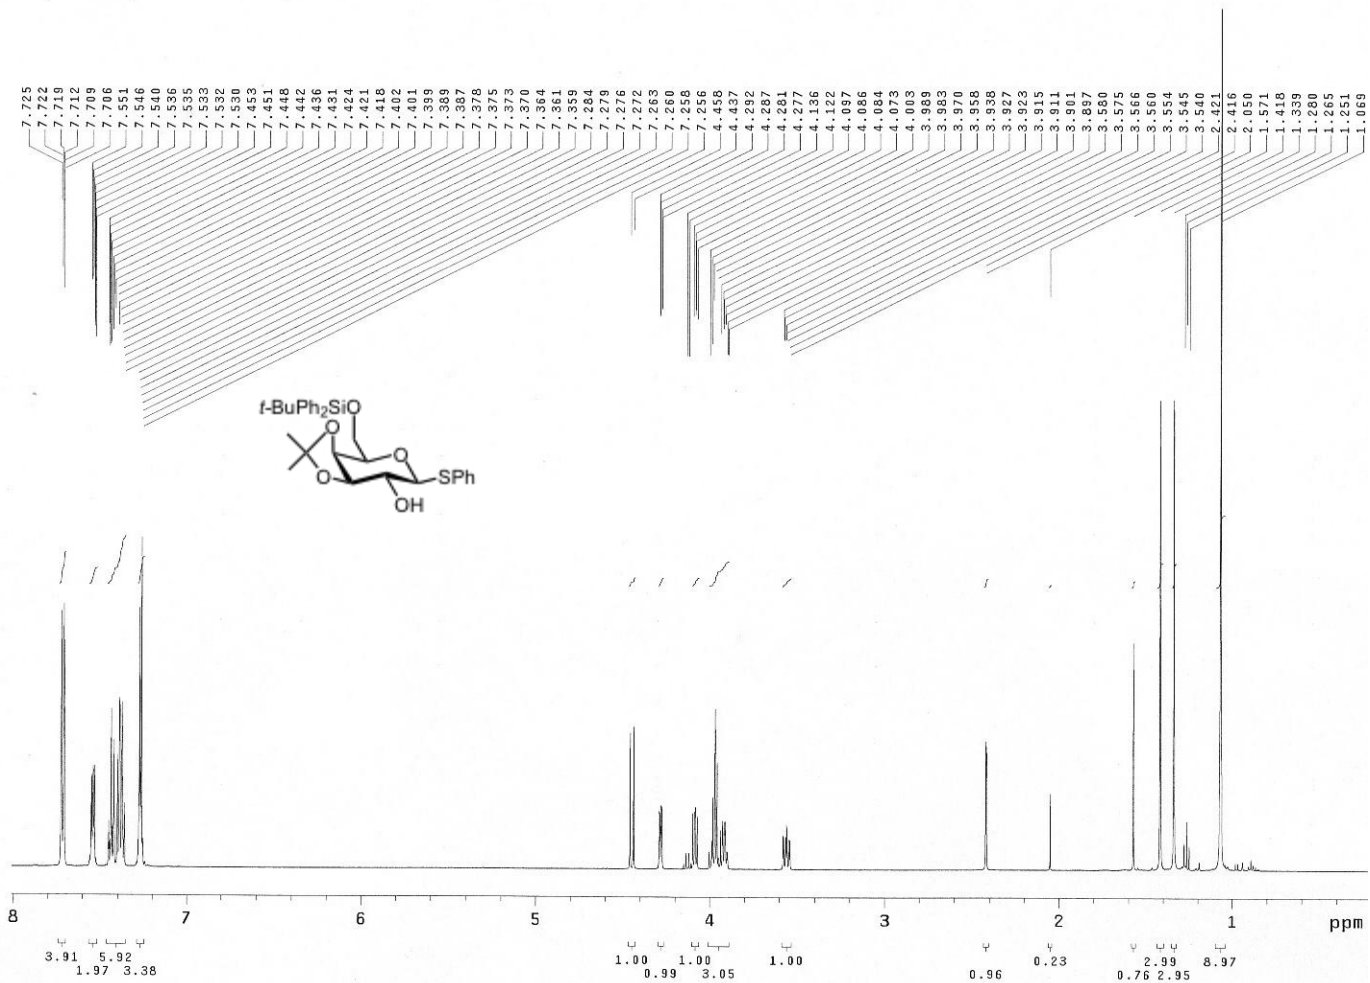

# <sup>13</sup>C NMR spectrum of **19**

pht-4-153-A  
125 MHz APT in CDCl<sub>3</sub> (ref. to CDCl<sub>3</sub> @ 77.0 ppm), temp 27.2 C -> actual temp = 27.0 C, sw probe  
C & CH<sub>2</sub> same, CH & CH<sub>3</sub> opposite side of solvent signal  
date: Jul 9 2007 sweep width: 33827Hz acq.time: 2.0s relax.time: 0.1s # scans: 168 dig.res.: 0.5 Hz/pt hz/mm:104.2  
file:/mnt/d600/home9/t11nmr/nmrdata/pht/pht-4/pht-4-153-A-APT.C.fid

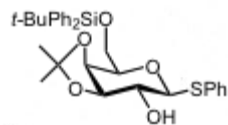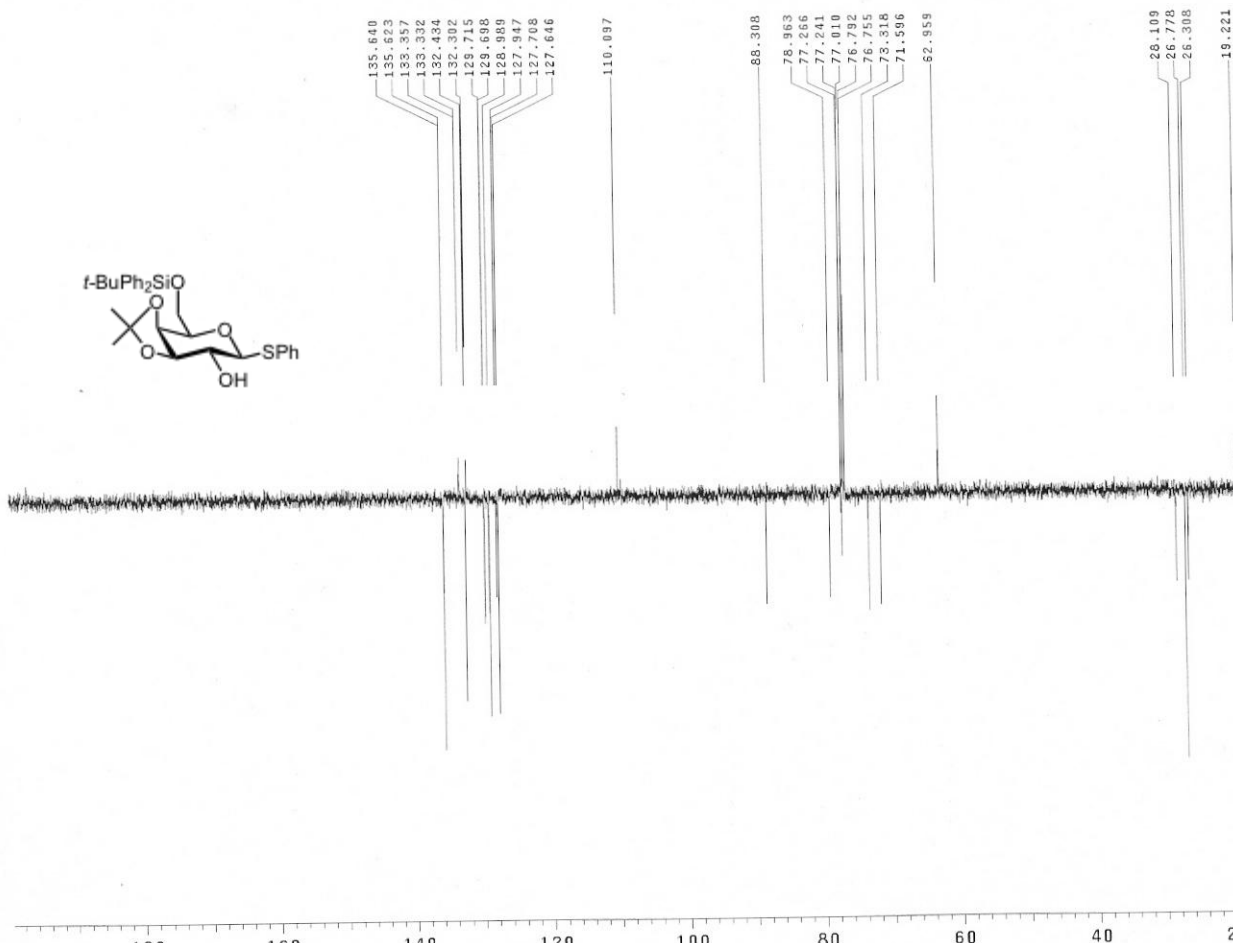

# <sup>1</sup>H NMR spectrum of **20**

pht-4-167-B  
500 MHz 1D in CDCl<sub>3</sub> (ref. to CDCl<sub>3</sub> @ 7.26 ppm), temp 27.2 C → actual temp = 27.0 C, sw500 probe  
Pulse Sequence: s2pu1

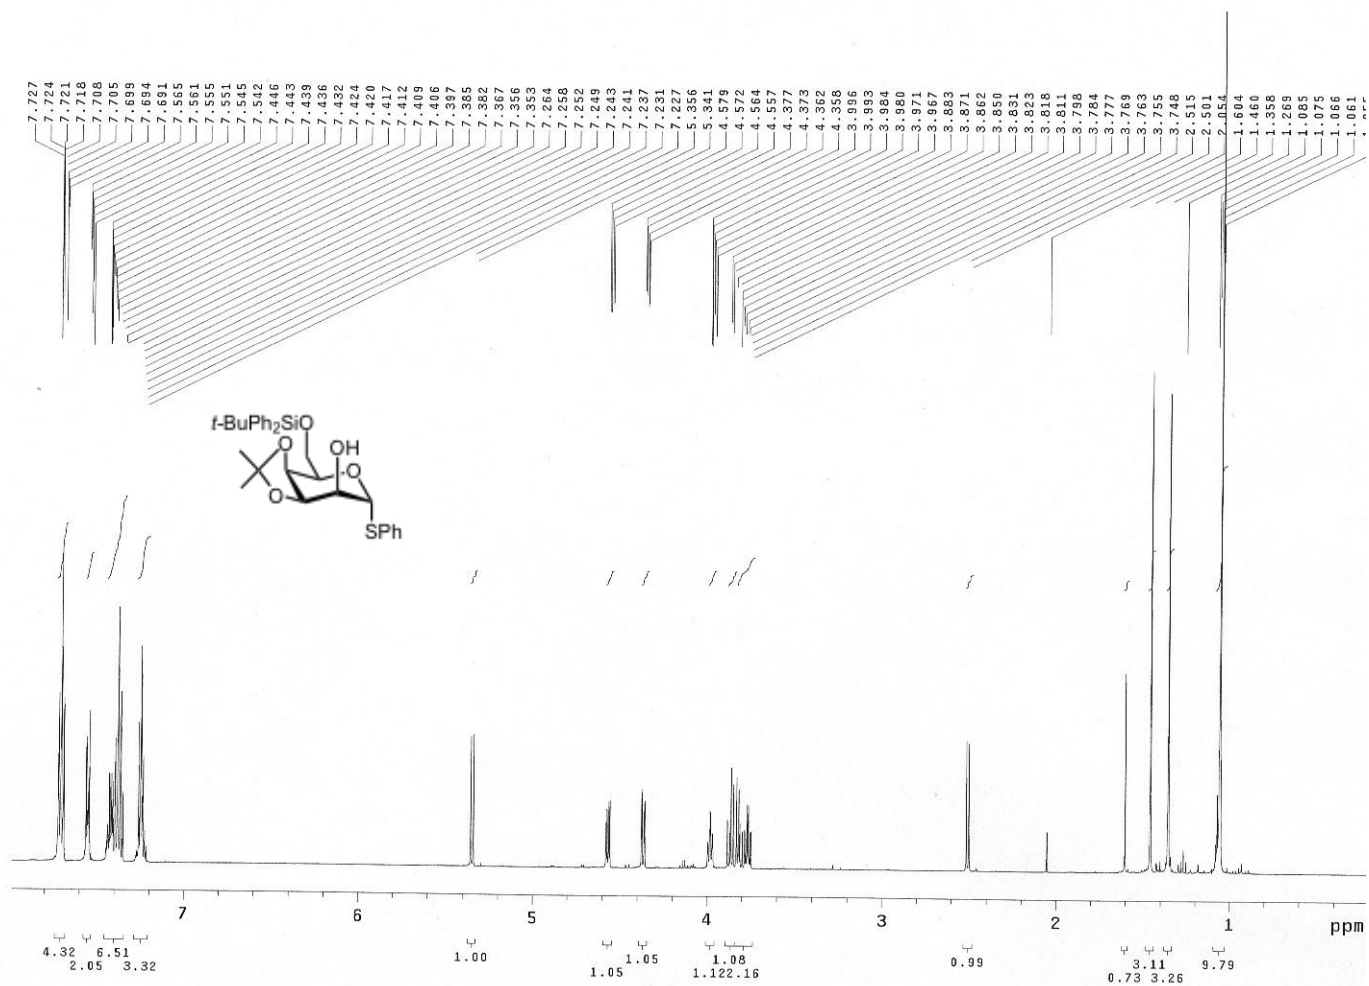



# $^{13}\text{C}$ NMR spectrum of **20**

pht-4-167-B  
125 MHz APT in CDCl<sub>3</sub> (ref. to CDCl<sub>3</sub> @ 77.0 ppm), temp 27.2 C -> actual temp = 27.0 C, sw probe  
C & CH<sub>2</sub> same, CH & CH<sub>3</sub> opposite side of solvent signal  
date: Jul 18 2007 sweep width: 33827Hz acq.time: 2.0s relax.time: 0.1s # scans: 152 dig.res.: 0.5 Hz/pt hz/mm:104.0  
file:/mnt/d600/home9/t11nmr/nmrdata/pht/pht-4/pht-4-167-B-APT.fid

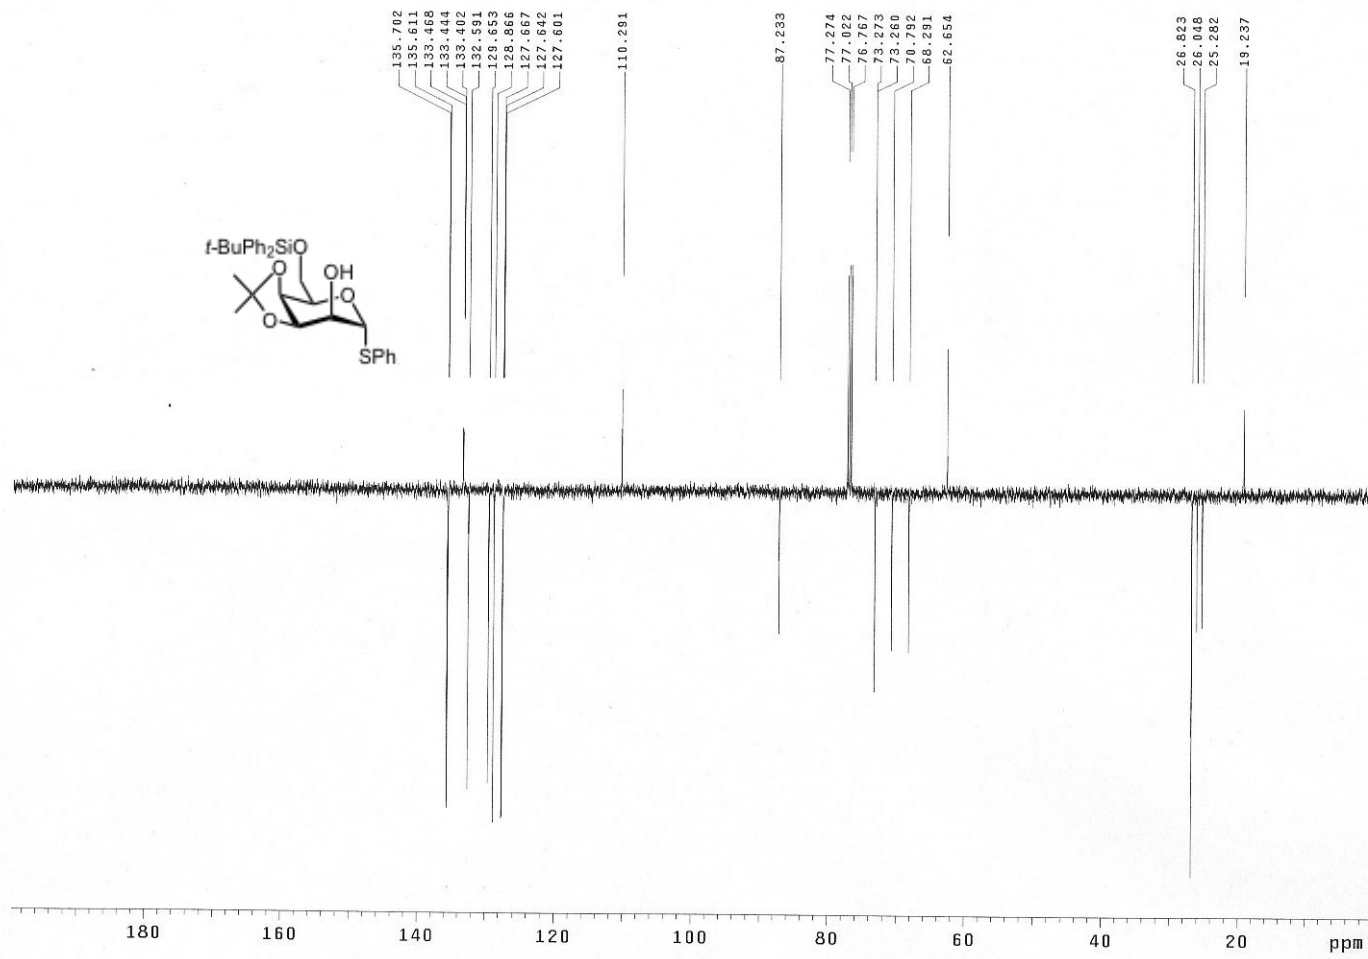

# <sup>1</sup>H NMR spectrum of **21**

pht-4-171-B  
500 MHz 1D in CDCl<sub>3</sub> (ref. to CDCl<sub>3</sub> @ 7.26 ppm), temp 27.2 C -> actual temp = 27.0 C, sw500 probe  
Pulse Sequence: s2pu1

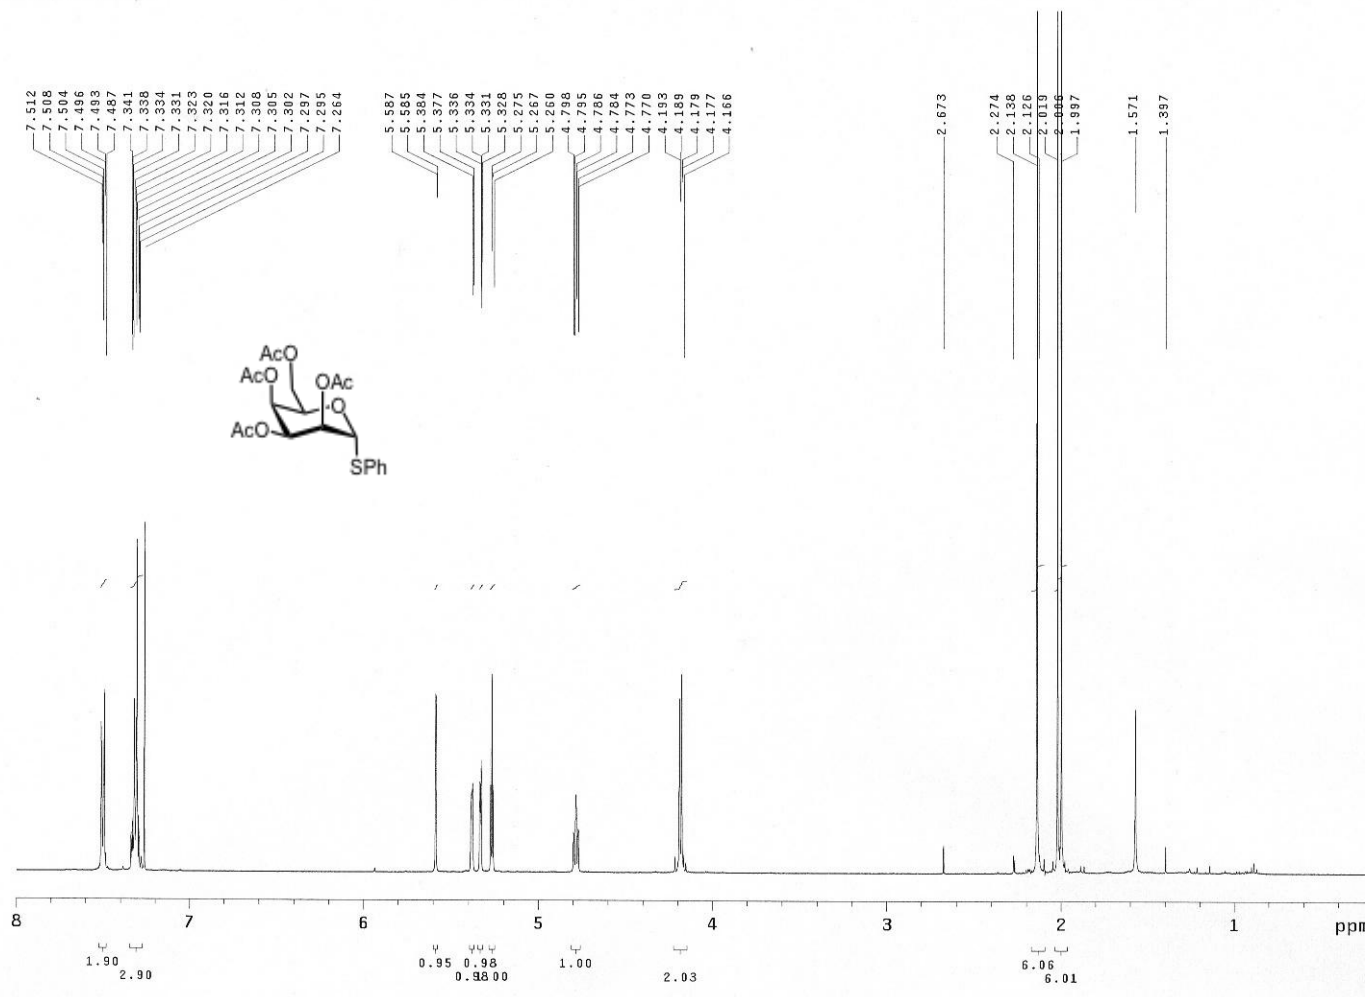

# <sup>1</sup>H NMR spectrum of **22**

pht-4-171-A  
500 MHz 1D in CDCl<sub>3</sub> (ref. to CDCl<sub>3</sub> @ 7.26 ppm), temp 27.2 C -> actual temp = 27.0 C, sw500 probe  
Pulse Sequence: s2pu1

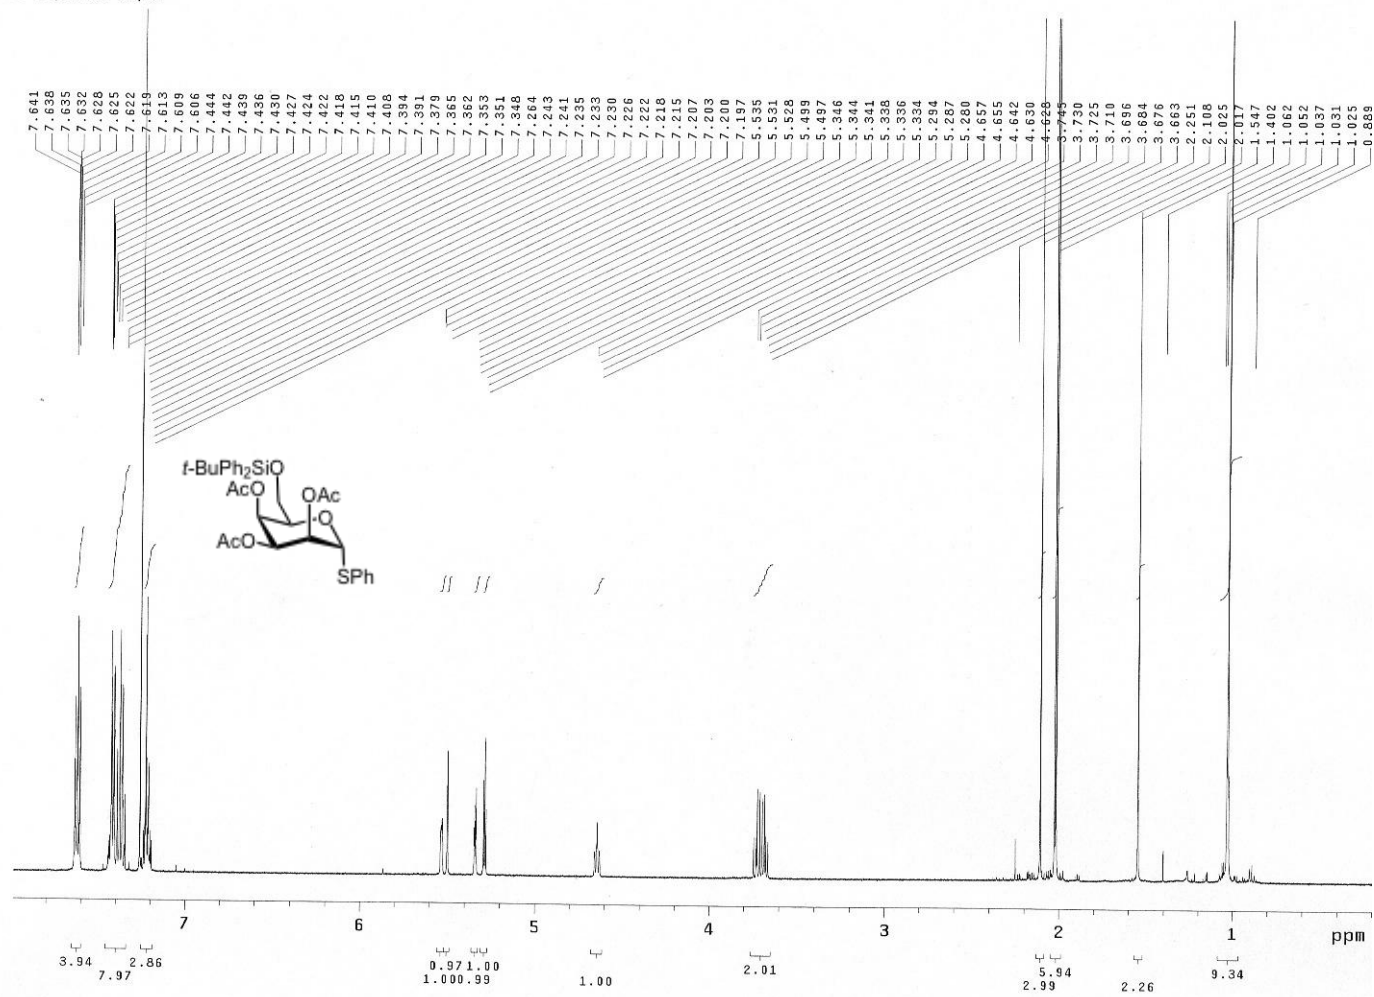

# <sup>1</sup>H NMR spectrum of **23**

pht-4-193-A  
500 MHz 1D in CDCl<sub>3</sub> (ref. to CDCl<sub>3</sub> @ 7.26 ppm), temp 27.2 C -> actual temp = 27.0 C, sw500 probe  
Pulse Sequence: s2pul

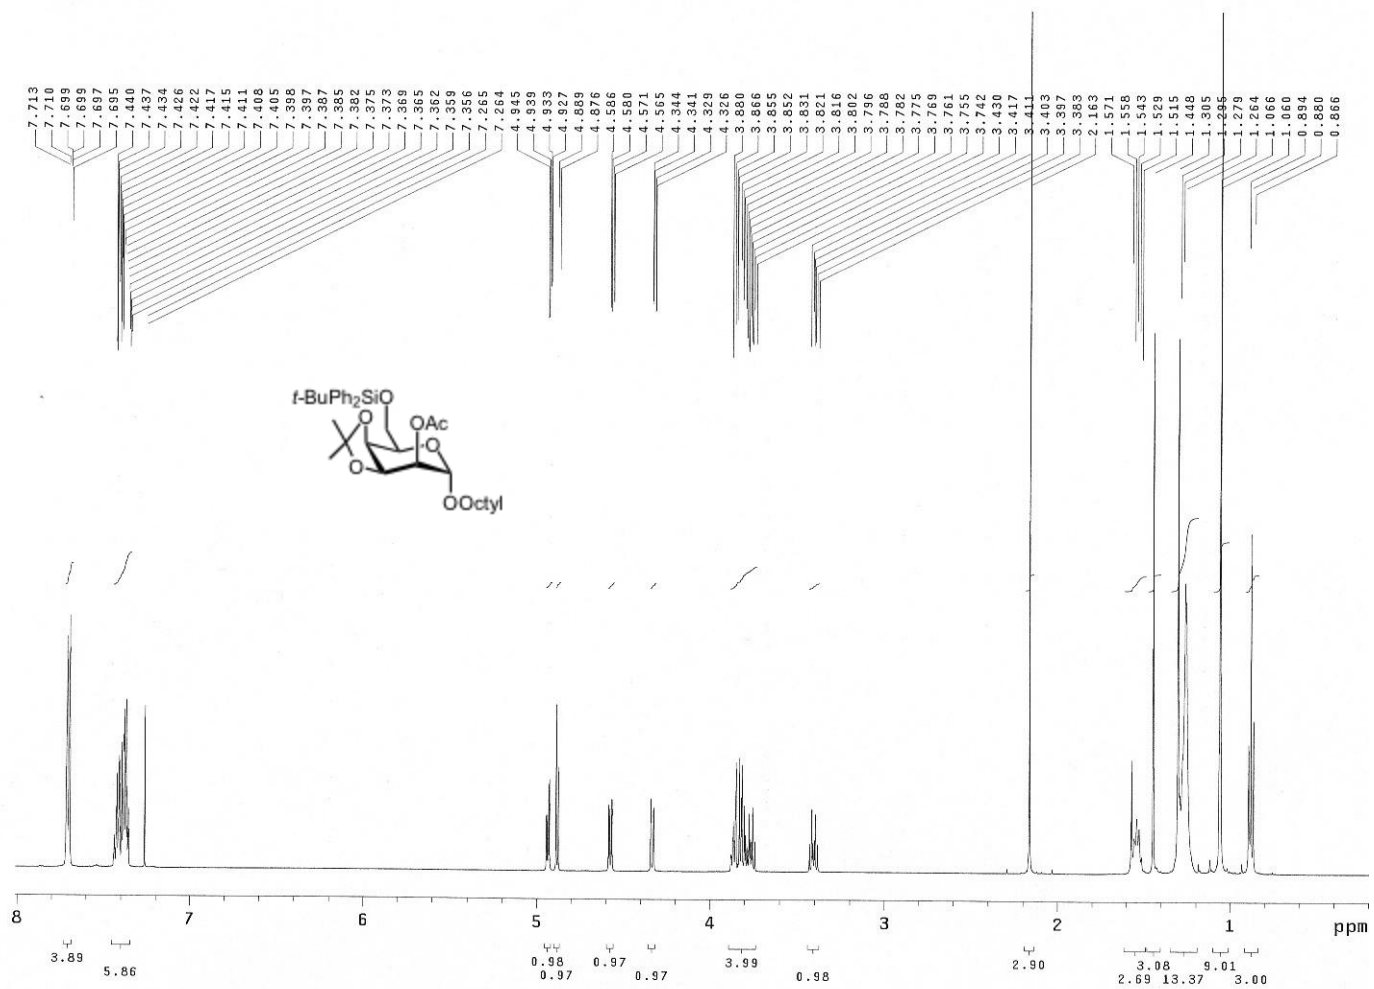

# $^{13}\text{C}$ NMR spectrum of **23**

pht-4-193-A  
125 MHz APT in CDCl<sub>3</sub> (ref. to CDCl<sub>3</sub> @ 77.0 ppm), temp 27.2 C -> actual temp = 27.0 C, sw probe  
C & CH<sub>2</sub> same, CH & CH<sub>3</sub> opposite side of solvent signal  
date: Aug 11 2007 sweep width: 33827Hz acq.time: 2.0s relax.time: 0.1s # scans: 256 dig.res.: 0.5 Hz/pt hz/mm:104.5  
file:/mnt/d600/home9/t11nmr/nmrdata/pht/pht-4/pht-4-193-A-APTC.fid

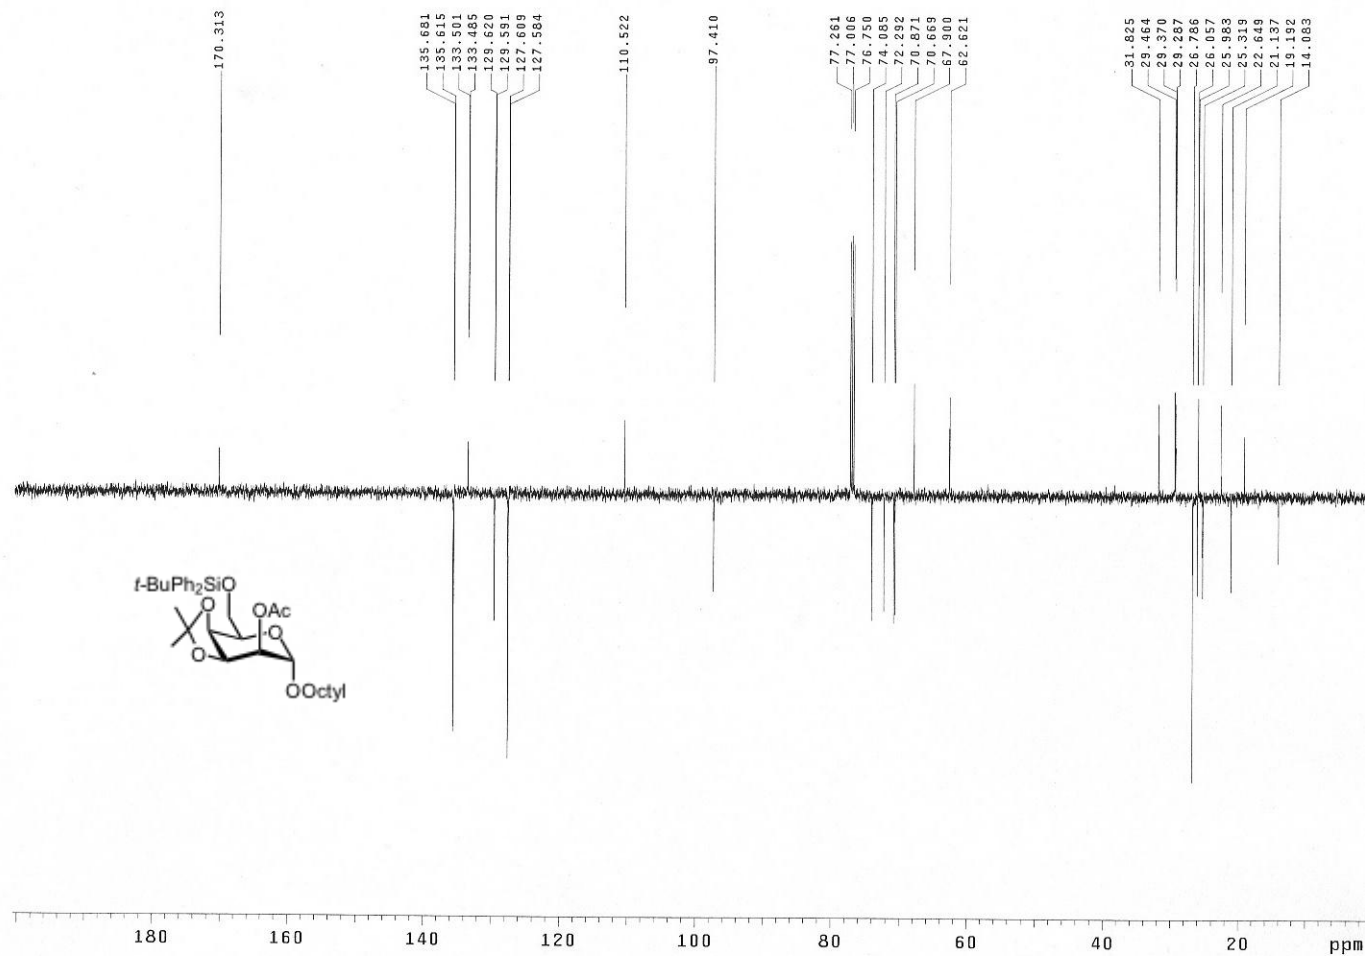

# $^1\text{H}$ NMR spectrum of 26

pht-4-79-A  
600 MHz 1D in CDCl<sub>3</sub> (ref. to CDCl<sub>3</sub> @ 7.26 ppm), temp 28.0 C -> actual temp = 27.0 C, id600 probe  
Pulse Sequence: s2pul

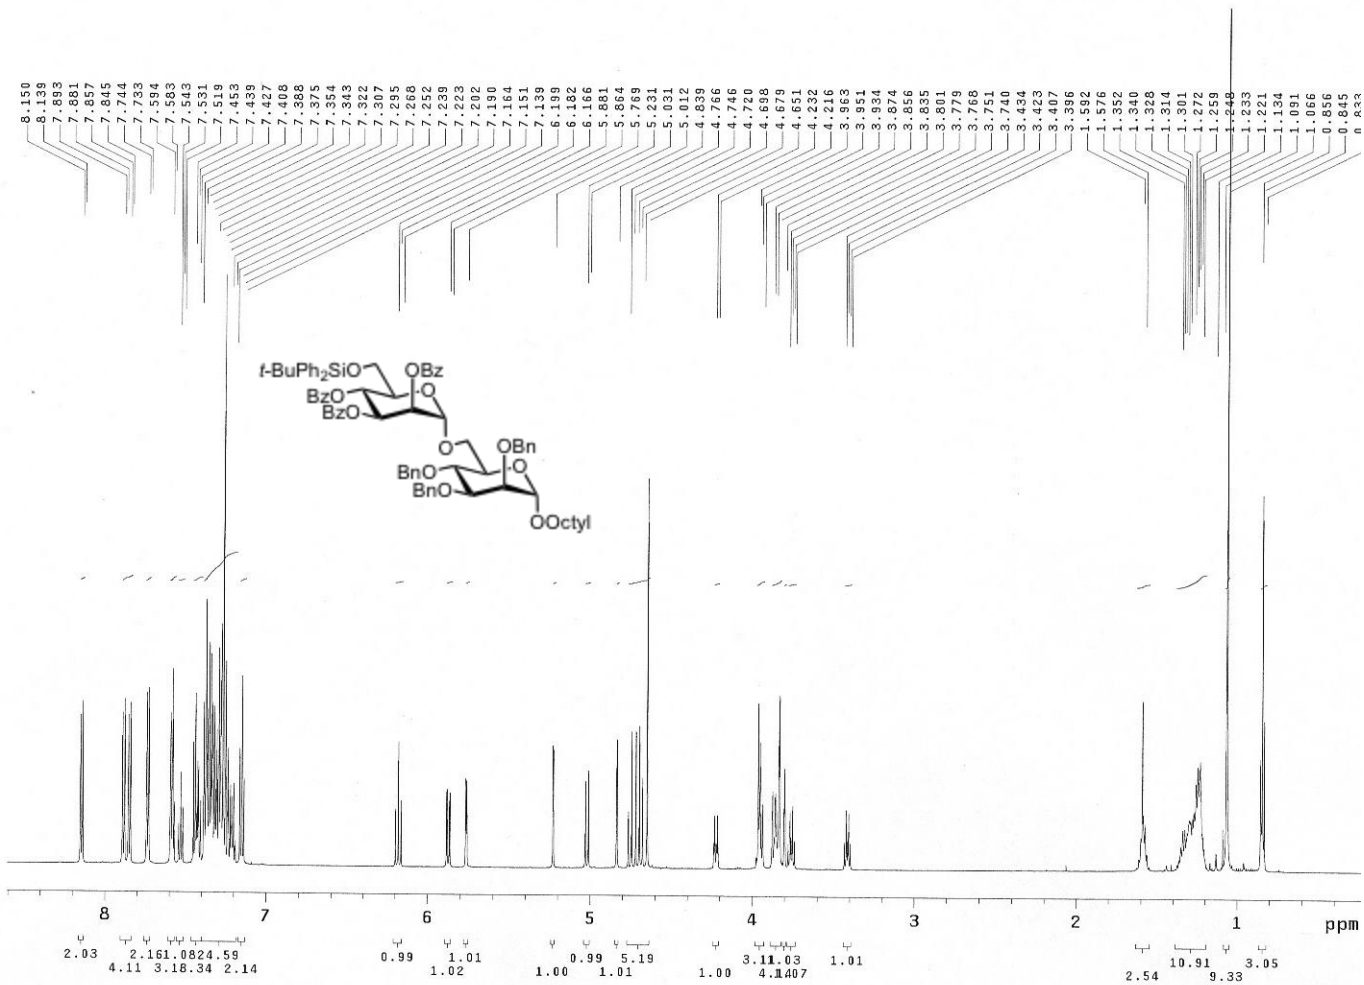

# <sup>13</sup>C NMR spectrum of 26

pht-4-79-A  
125 MHz APT in CDCl<sub>3</sub> (ref. to CDCl<sub>3</sub> @ 77.0 ppm), temp 27.2 C -> actual temp = 27.0 C, sw probe  
C & CH2 same, CH & CH3 opposite side of solvent signal  
date: Nov 20 2006 sweep width: 33827Hz acq.time: 2.0s relax.time: 0.1s # scans: 1056 dig.res.: 0.5 Hz/pt hz/mm:104.1  
file:/mnt/d600/home9/t11nmr/nmrdata/pht/pht-4/2006.11.20.15\_pht-4-79-A-APTC\_C13\_apt.fid

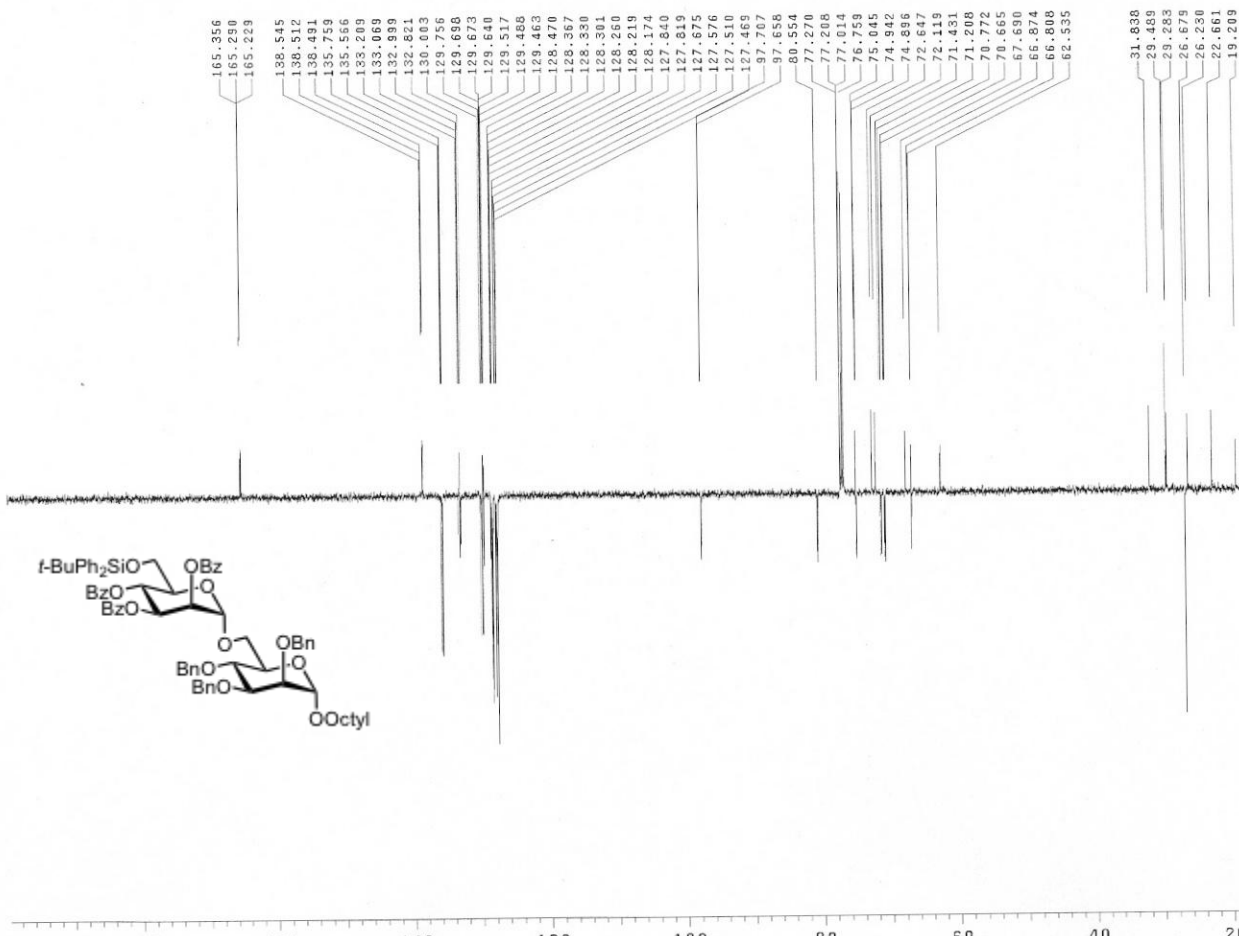

# <sup>1</sup>H NMR spectrum of **27**

pht-4-77-A  
600 MHz 1D in CDCl<sub>3</sub> (ref. to CDCl<sub>3</sub> @ 7.26 ppm), temp 28.0 C → actual temp = 27.0 C, id600 probe

Pulse Sequence: s2pu1

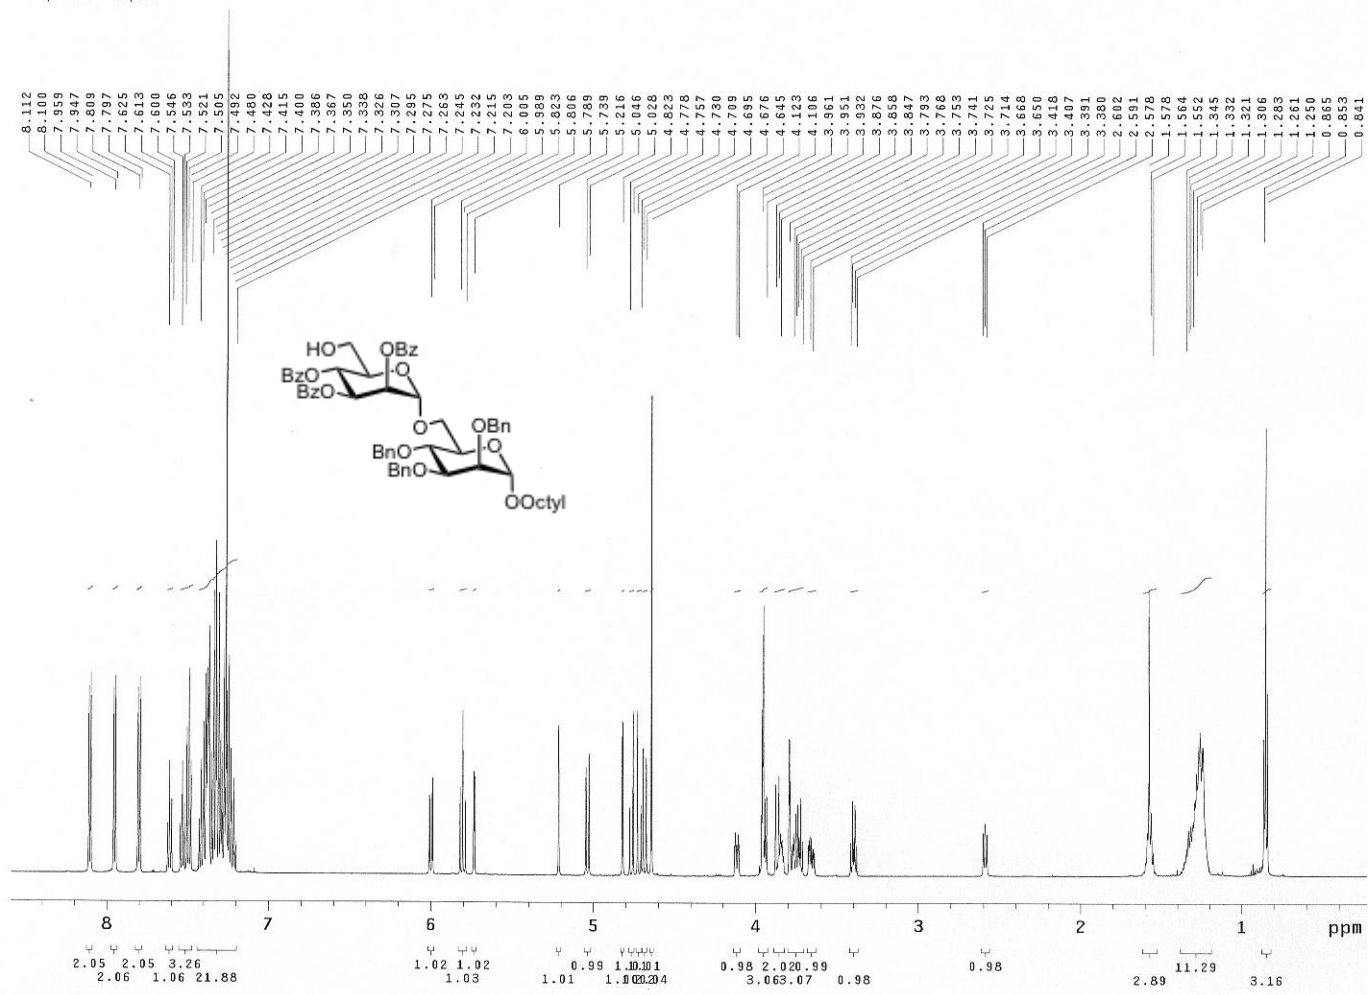



# $^{13}\text{C}$ NMR spectrum of **27**

pht-4-77-A  
125 MHz APT in  $\text{CDCl}_3$  (ref. to  $\text{CDCl}_3$  @ 77.0 ppm), temp 27.2 C -> actual temp = 27.0 C, sw probe  
C & CH2 same, CH & CH3 opposite side of solvent signal  
date: Nov 14 2006 sweep width: 33027Hz acq.time: 2.0s relax.time: 0.1s # scans: 1408 dig.res.: 0.5 Hz/pt hz/mm:103.8  
File: /mnt/d600/home9/t11nmr/nmrdata/pht/pht-4/pht-4-77-A-APT.fid

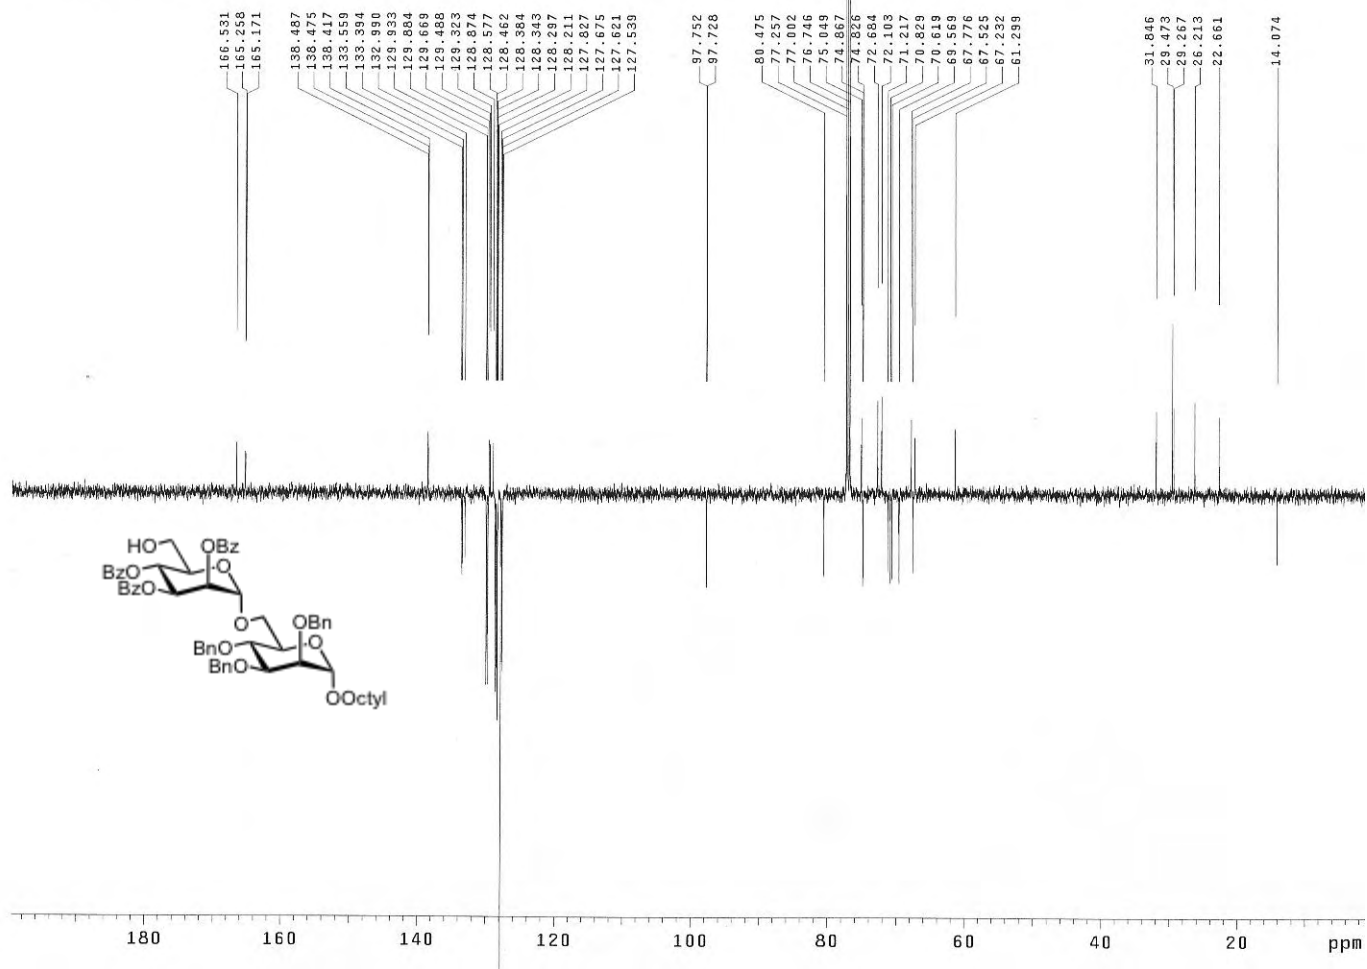

# $^1\text{H}$ NMR spectrum of **28**

pht-4-161-A  
600 MHz 1D in CDCl<sub>3</sub> (ref. to CDCl<sub>3</sub> @ 7.26 ppm), temp 28.0 C -> actual temp = 27.0 C, id600 probe

Pulse Sequence: s2pul

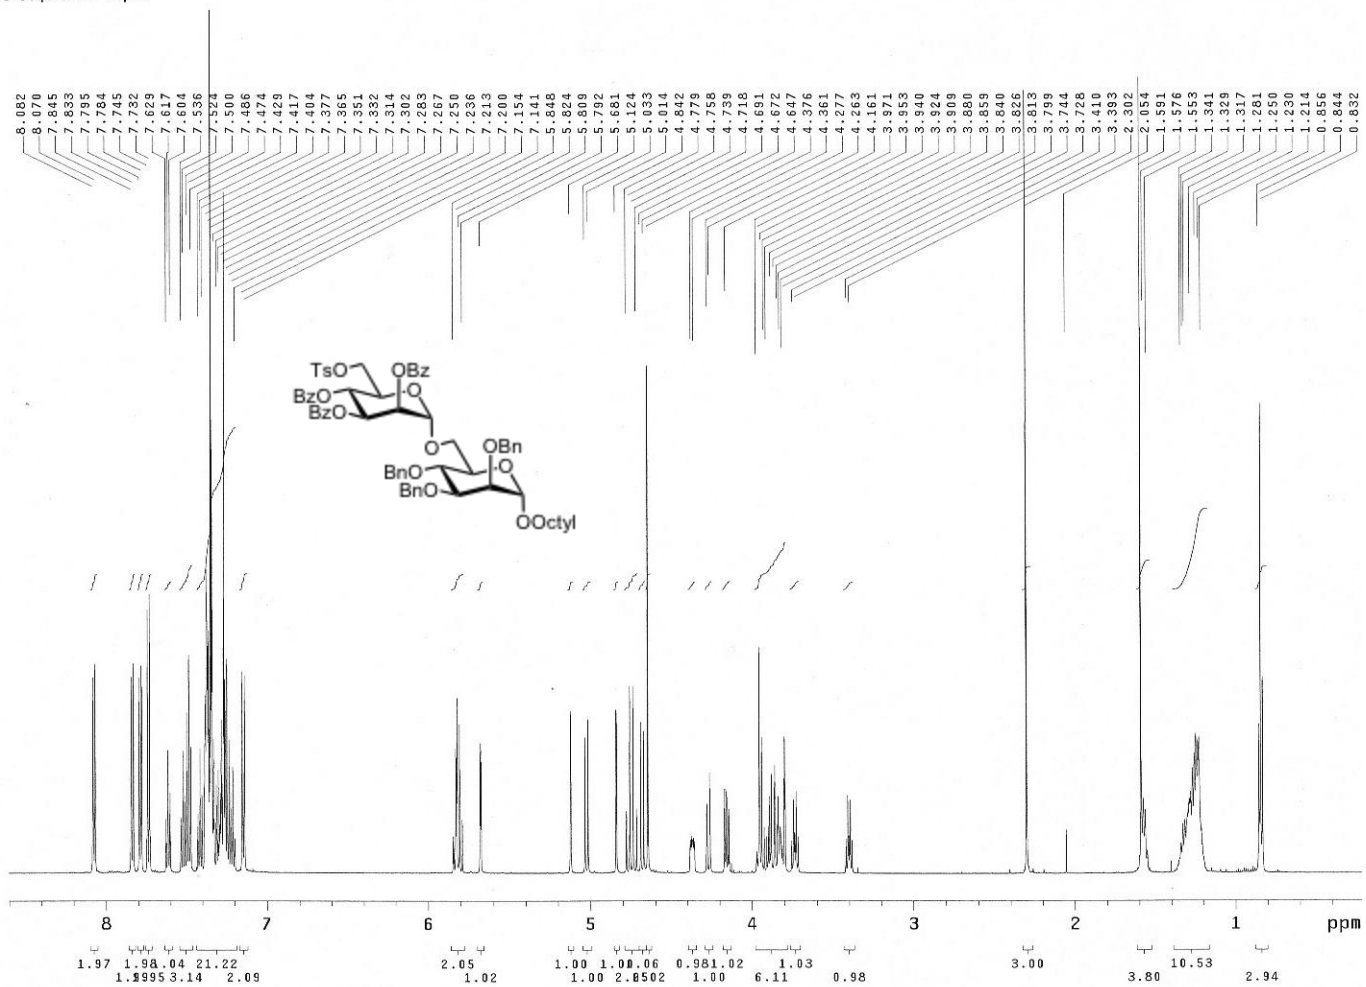

# $^{13}\text{C}$ NMR spectrum of **28**

pht-4-161-A  
125 MHz APT in CDCl<sub>3</sub> (ref. to CDCl<sub>3</sub> @ 77.0 ppm), temp 27.2 C -> actual temp = 27.0 C, sw probe  
C & CH<sub>2</sub> same, CH & CH<sub>3</sub> opposite side of solvent signal  
date: Jul 17 2007 sweep width: 33827Hz acq.time: 2.0s relax.time: 0.1s # scans: 1368 dig.res.: 0.5 Hz/pt hz/mm:104.0  
file:/mnt/d600/home9/t11nmr/nmrdata/pht/pht-4/pht-4-161-A-APTC.fid

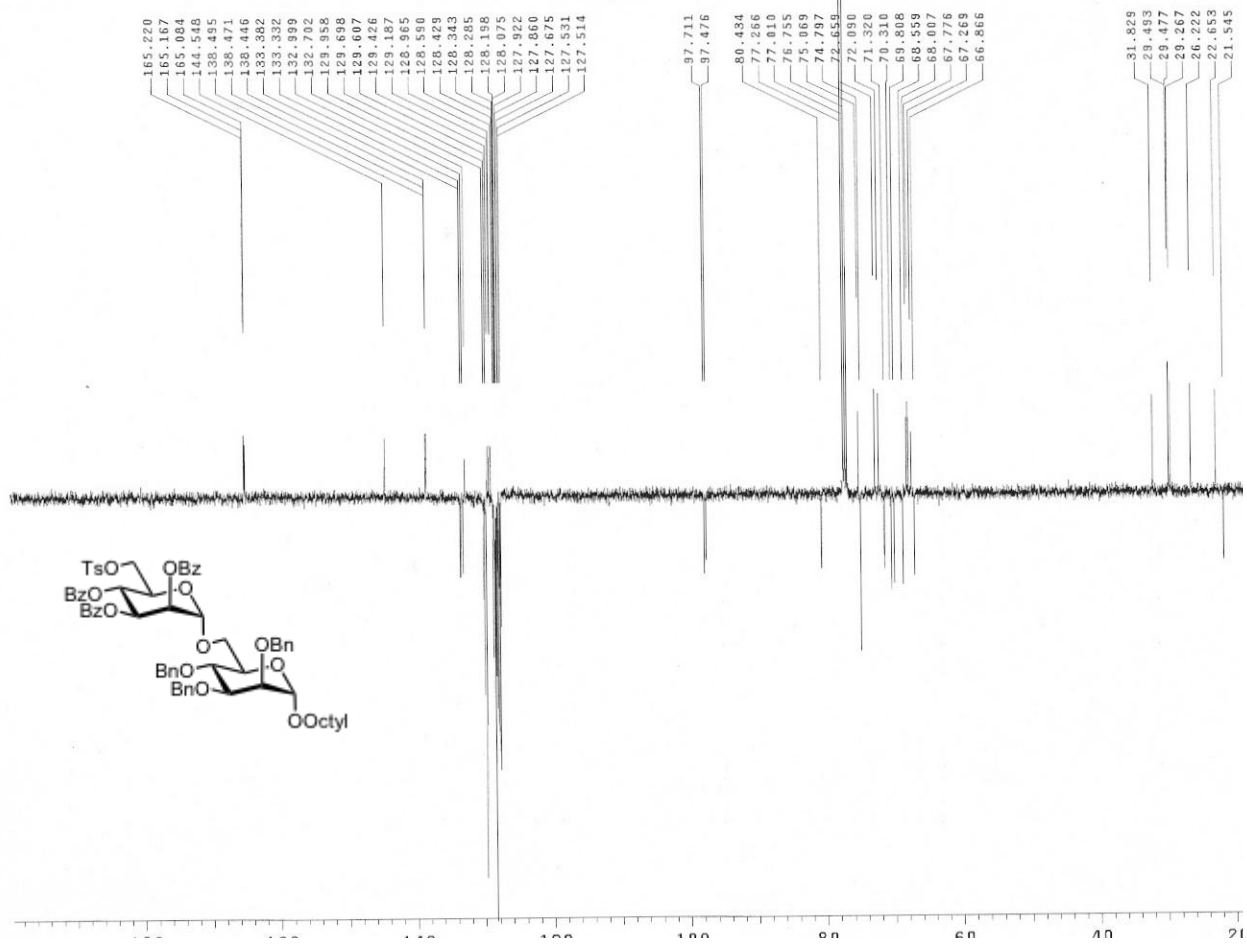

# <sup>1</sup>H NMR spectrum of **29**

pht-4-165-A  
500 MHz 1D in CDCl<sub>3</sub> (ref. to CDCl<sub>3</sub> @ 7.26 ppm), temp 27.2 C -> actual temp = 27.0 C, sw500 probe  
Pulse Sequence: s2pu1

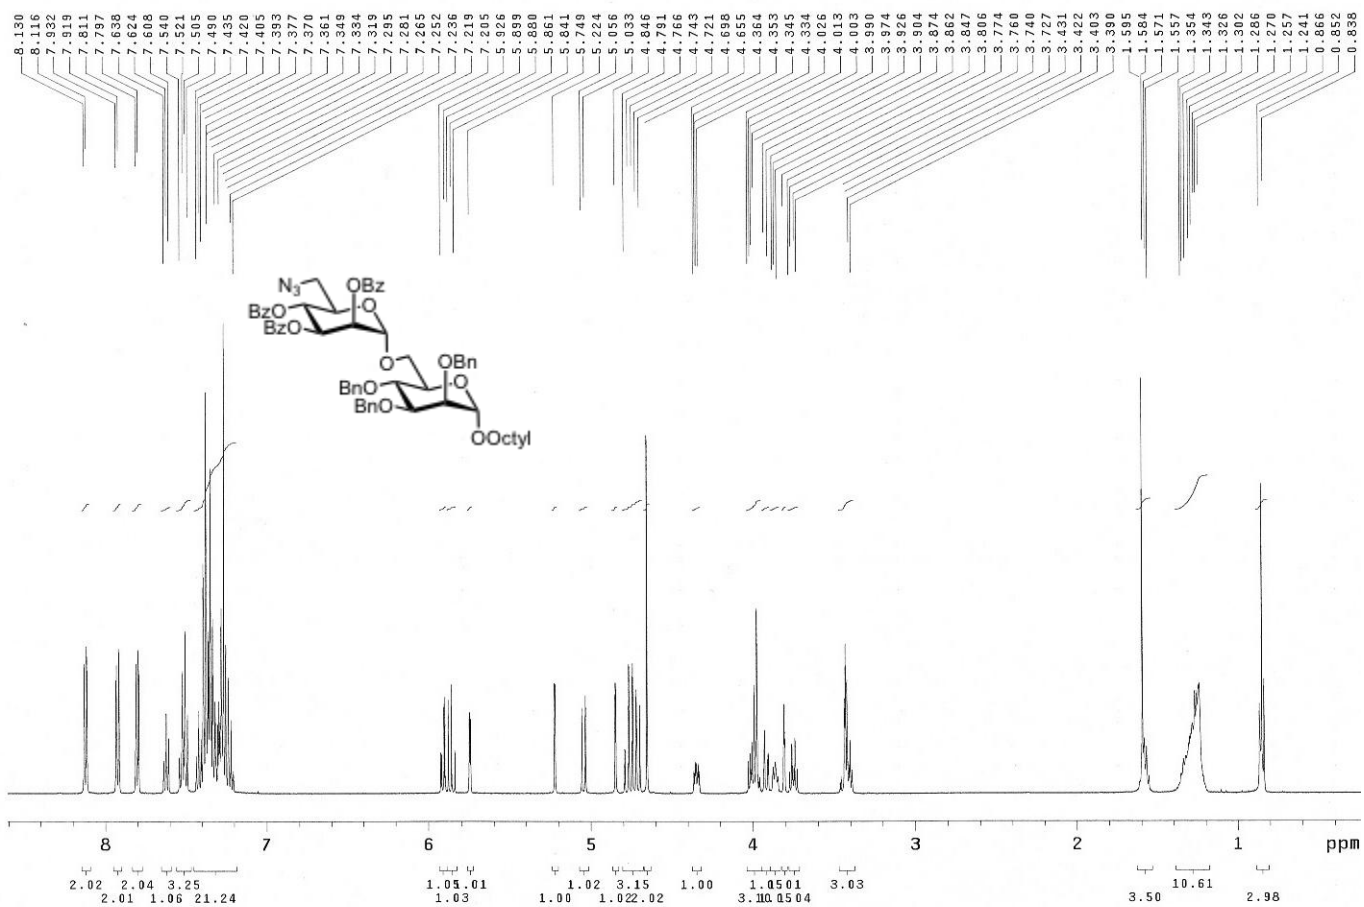

# <sup>13</sup>C NMR spectrum of 29

pht-4-165-A  
125 MHz APT in CDCl<sub>3</sub> (ref. to CDCl<sub>3</sub> @ 77.0 ppm), temp 27.2 C -> actual temp = 27.0 C, sw probe  
C & CH<sub>2</sub> same, CH & CH<sub>3</sub> opposite side of solvent signal  
date: Jul 23 2007 sweep width: 33827Hz acq.time: 2.0s relax.time: 0.1s # scans: 480 dig.res.: 0.5 Hz/pt hz/mm:104.4  
file:/mnt/d600/home5/t11nmr/nmrdata/pht/pht-4/pht-4-165-A-APTC.fid

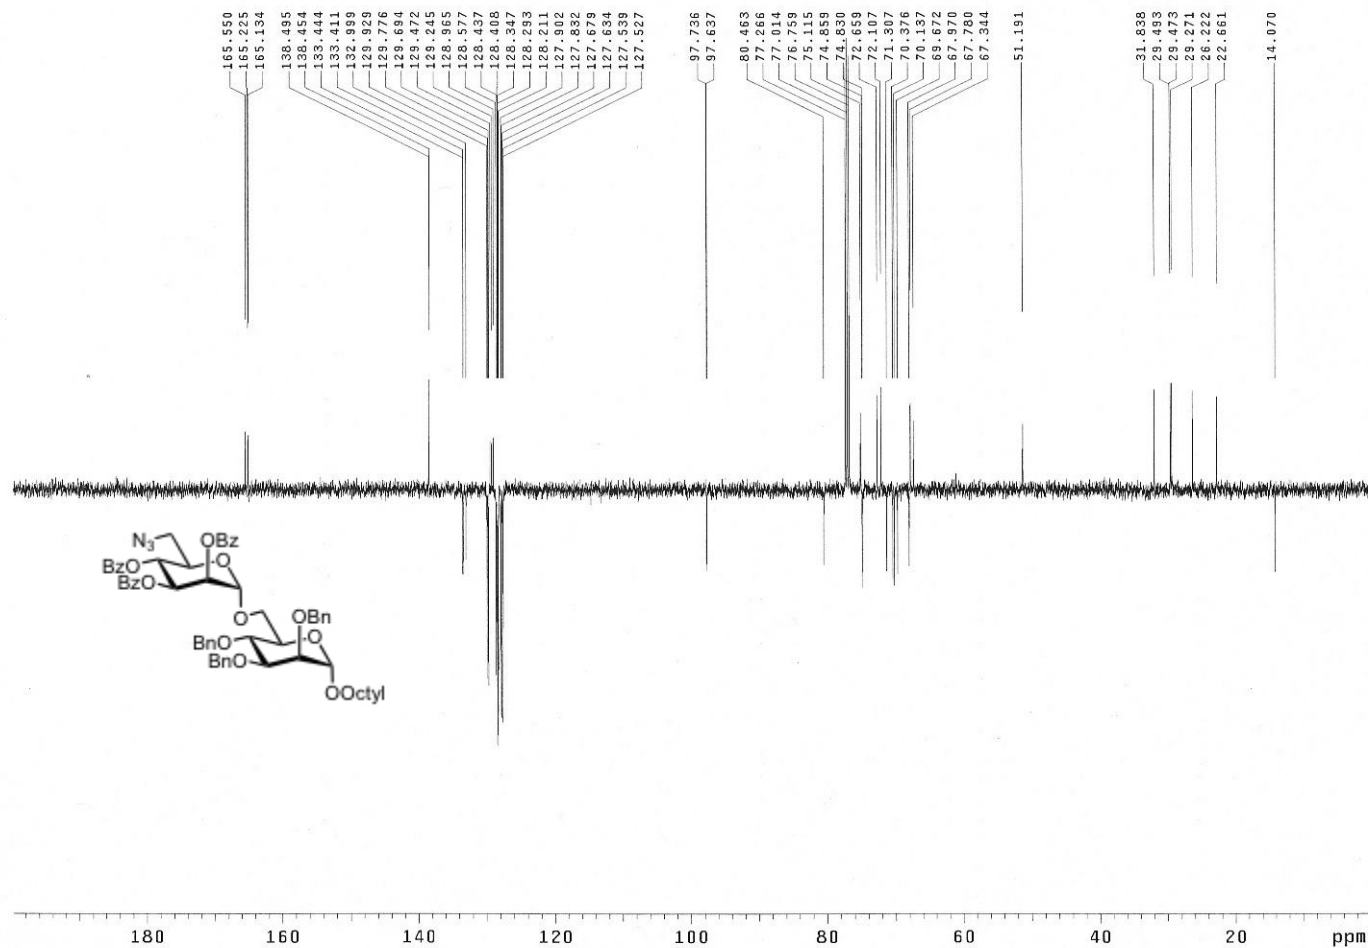

# <sup>1</sup>H NMR spectrum of **30**

pht-4-179-A  
600 MHz ID in CDC13 (ref. to CDC13 @ 7.26 ppm), temp 28.0 C -> actual temp = 27.0 C, id600 probe

Pulse Sequence: s2pu1

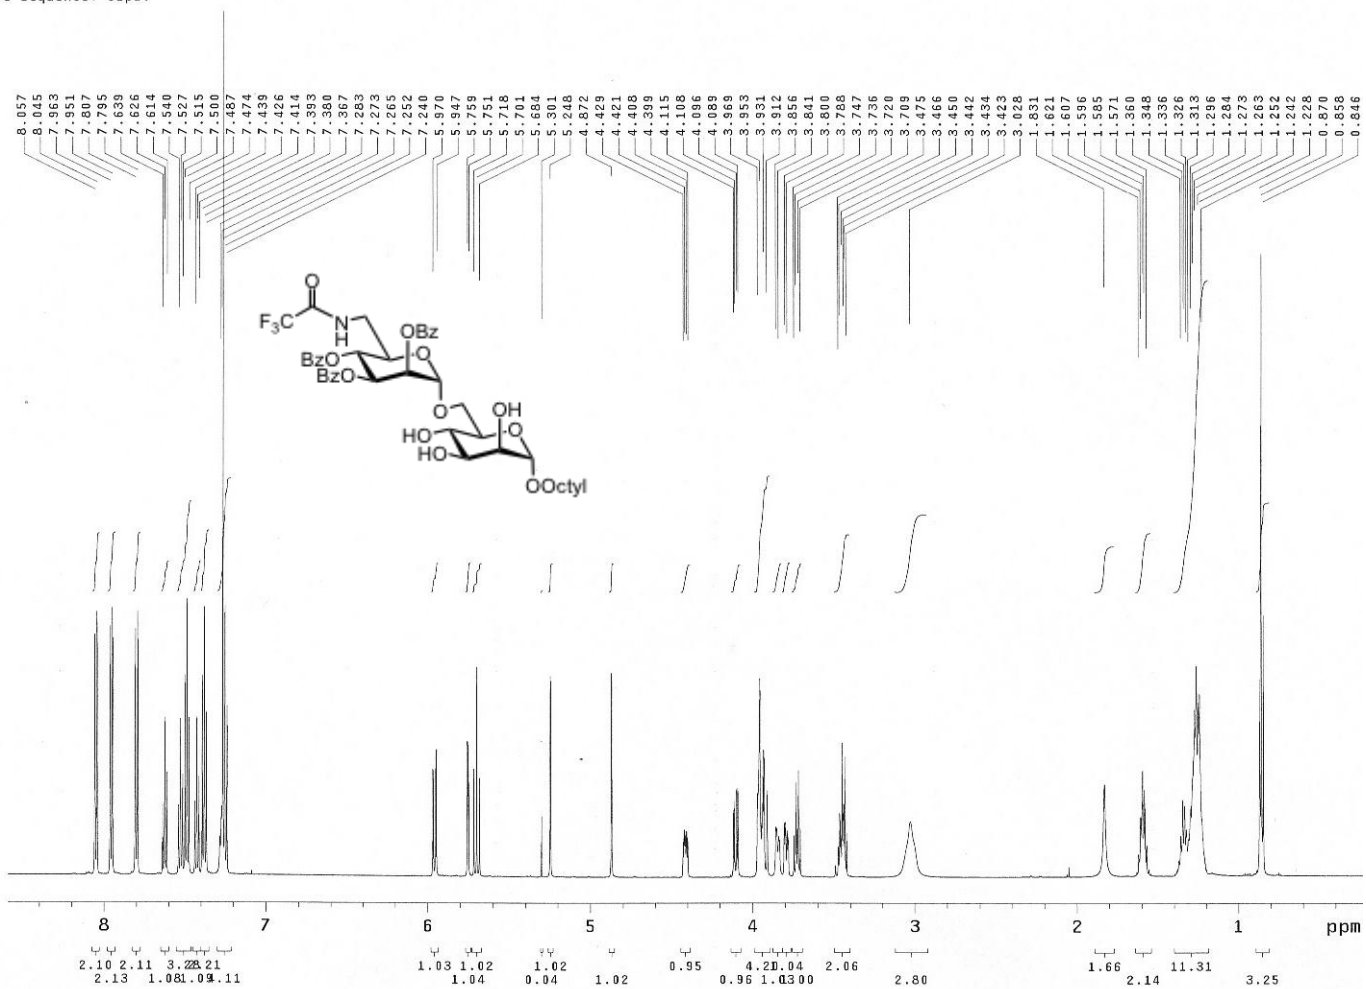

# <sup>13</sup>C NMR spectrum of **30**

pht-4-179-A  
125 MHz APT in CDCl<sub>3</sub> (ref. to CDCl<sub>3</sub> @ 77.0 ppm), temp 27.2 C -> actual temp = 27.0 C, sw probe  
C & CH<sub>2</sub> same, CH & CH<sub>3</sub> opposite side of solvent signal  
date: Aug 2 2007 sweep width: 33827Hz acq.time: 2.0s relax.time: 0.1s # scans: 1536 dig.res.: 0.5 Hz/pt hz/mm:104.1  
file:/mnt/d600/home9/t11nmr/nmrdata/pht/pht-4/pht-4-179-A-APT.C.fid

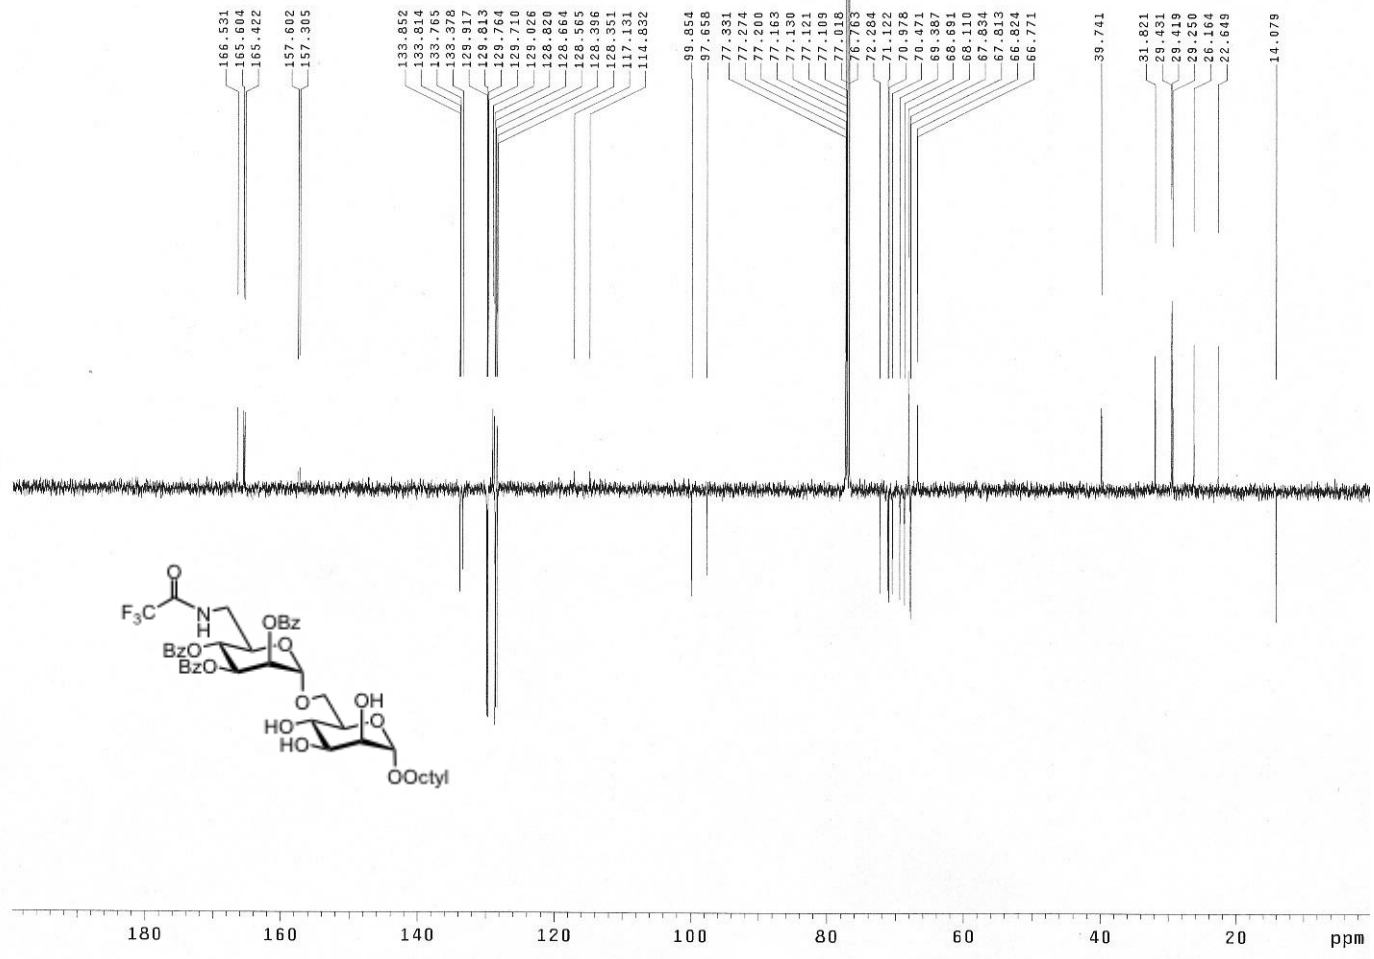

# $^{19}\text{F}$ NMR spectrum of **30**

pht-4-179-A  
376.132 MHz F19 1D 1n

file: pht-4-181-A-19F.fid  
Spectrometer: d601  
Pulse Sequence: s2pul  
Sweep width: 78818Hz acq.time: 3.0s relax.time: 1.0s # scans: 20 dig.res.: 0.3 Hz/pt hz/mm: 250.9  
file: /mnt/d600/home9/t11nmr/nmrdata/pht/pht-4/pht-4-181-A-19F.fid

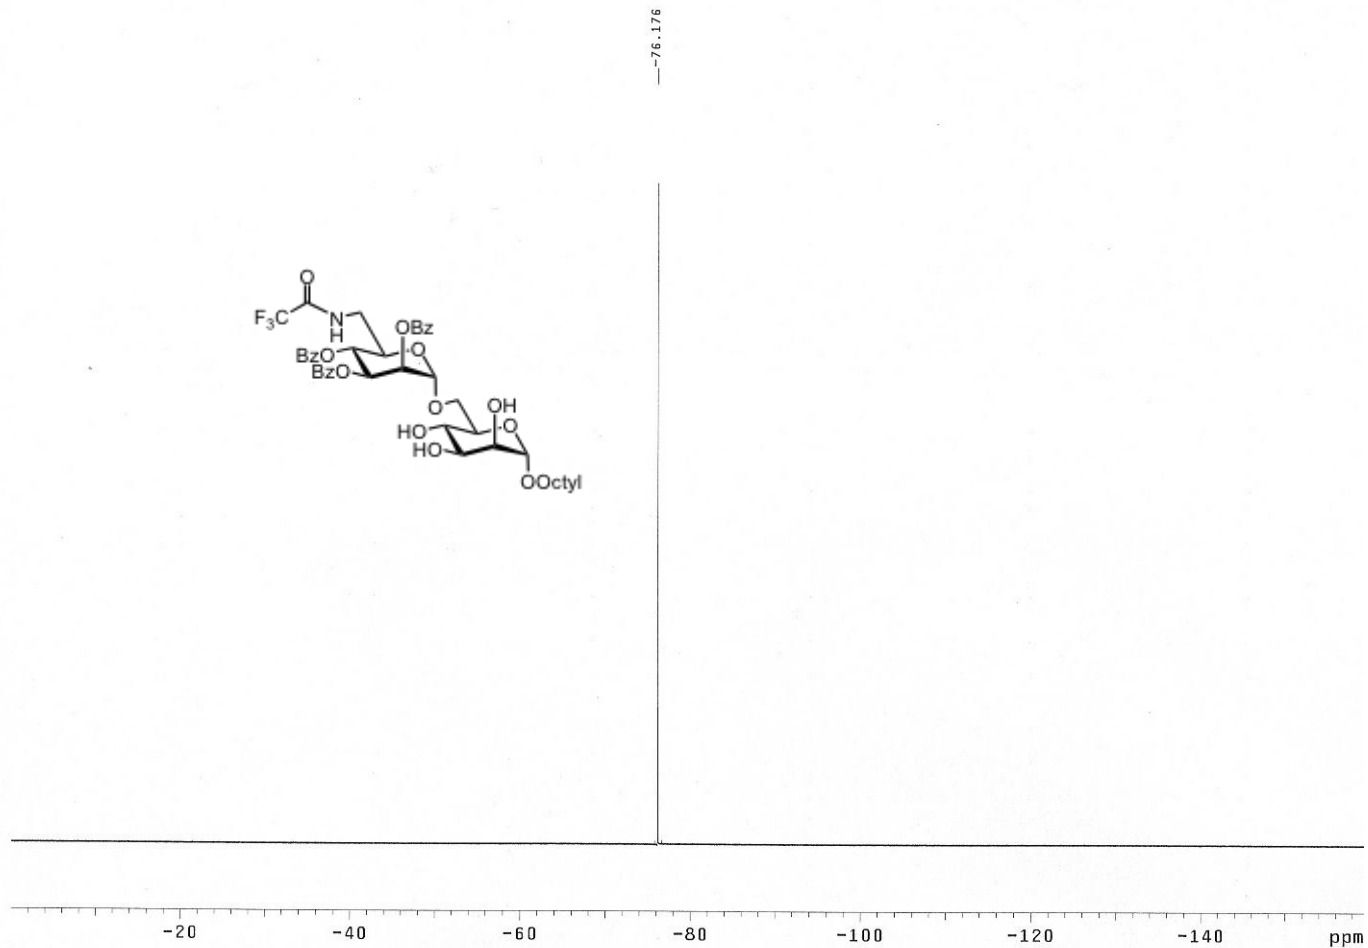



# <sup>1</sup>H NMR spectrum of **31**

pht-4-135-A  
500 MHz 1D in CDCl<sub>3</sub> (ref. to CDCl<sub>3</sub> @ 7.26 ppm), temp 27.2 C -> actual temp = 27.0 C, sw500 probe

Pulse Sequence: s2pu1

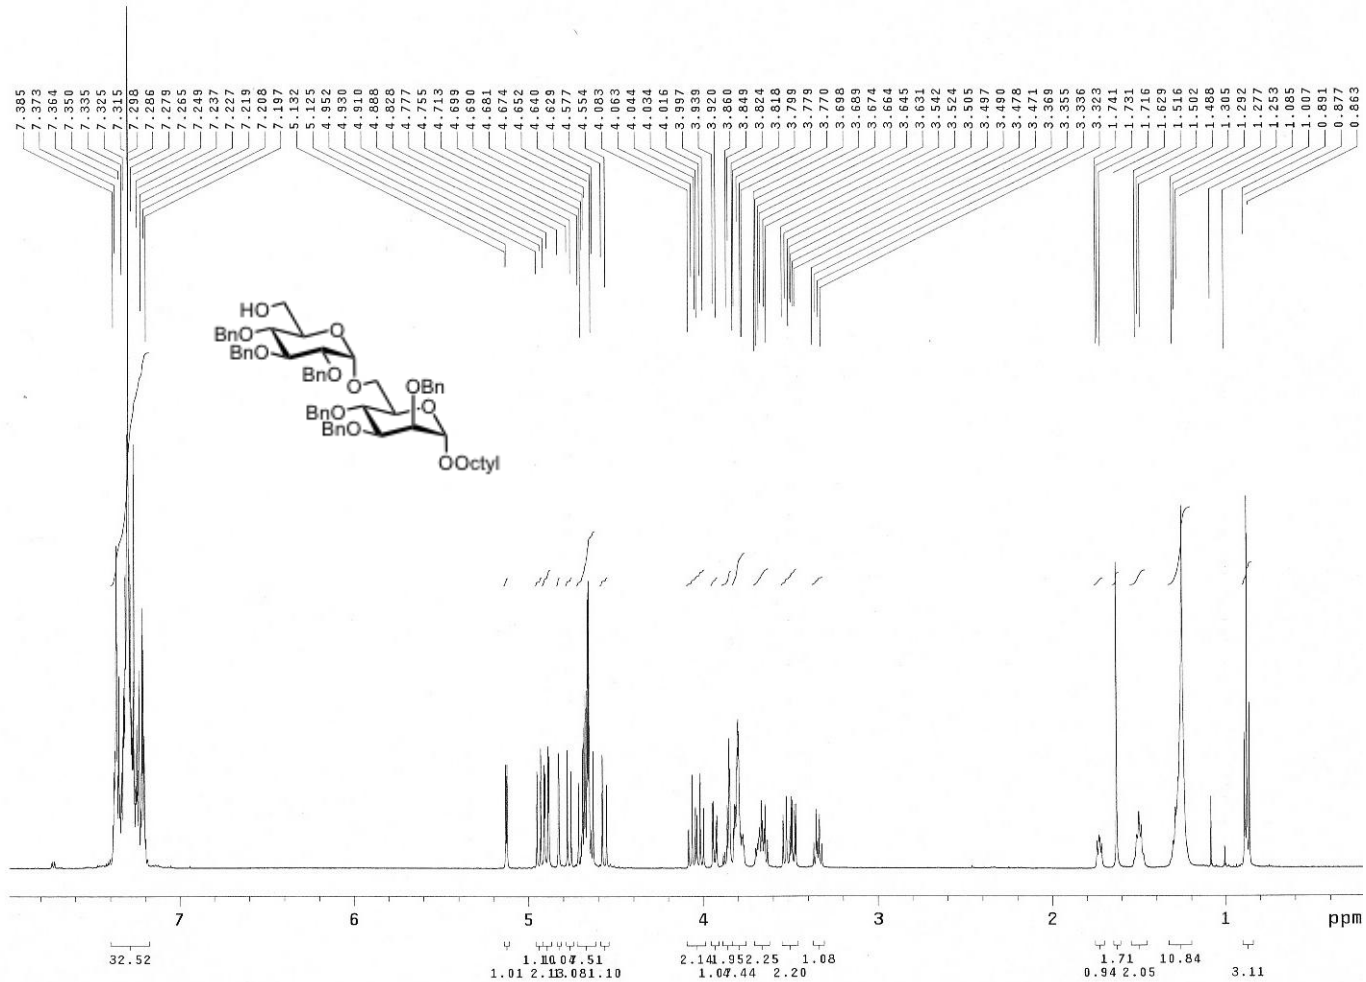

# <sup>13</sup>C NMR spectrum of **31**

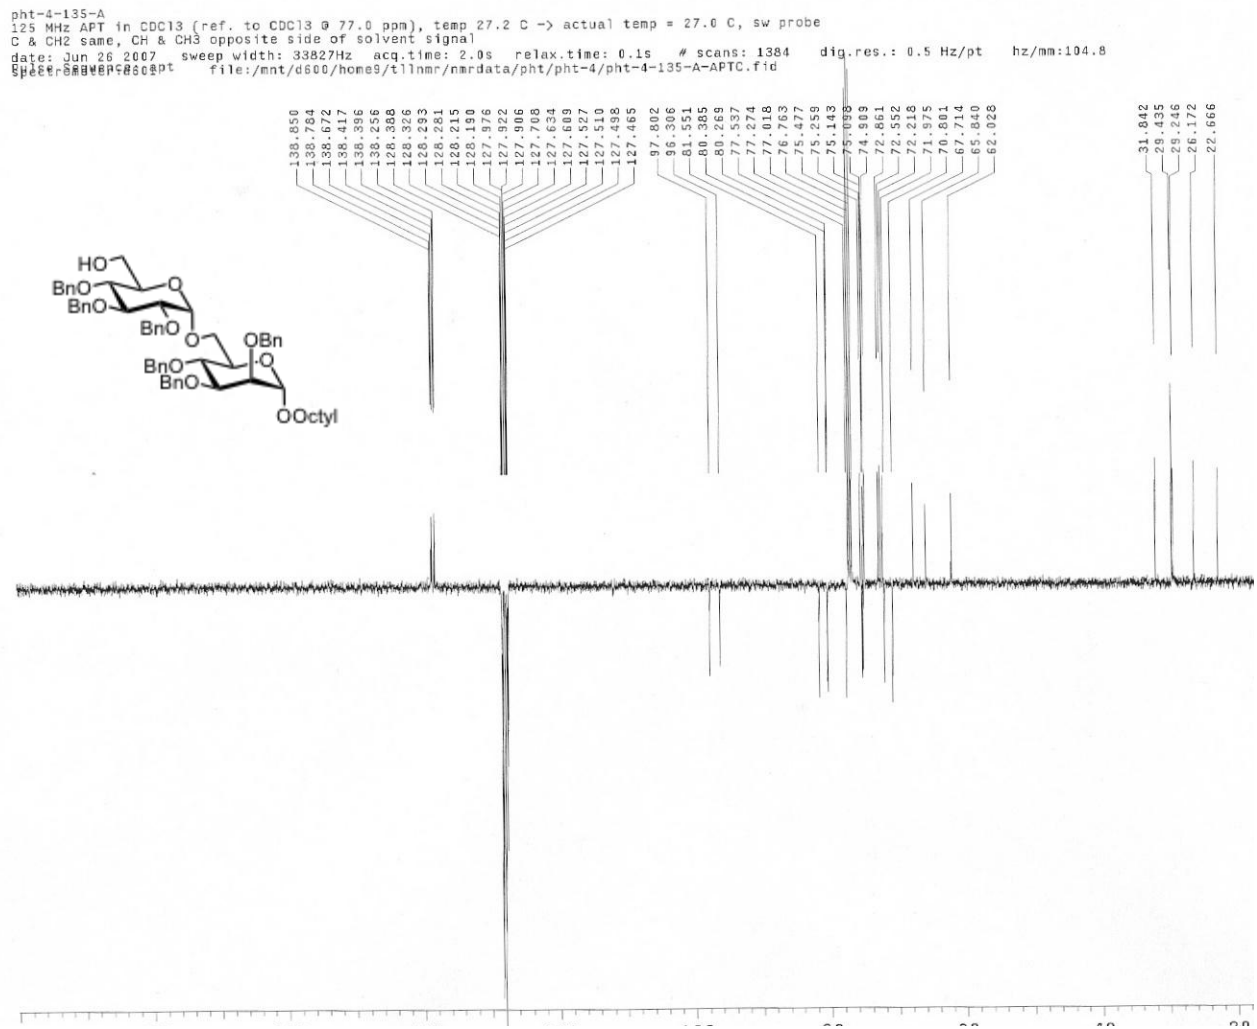

# <sup>1</sup>H NMR spectrum of 32

pht-4-151-A  
 600 MHz 1D 1H in CDCl3 (ref. to CDCl3 @ 7.26 ppm), temp 28.0 C -> actual temp = 27.0 C, id600 probe  
 Pulse Sequence: s2pu1

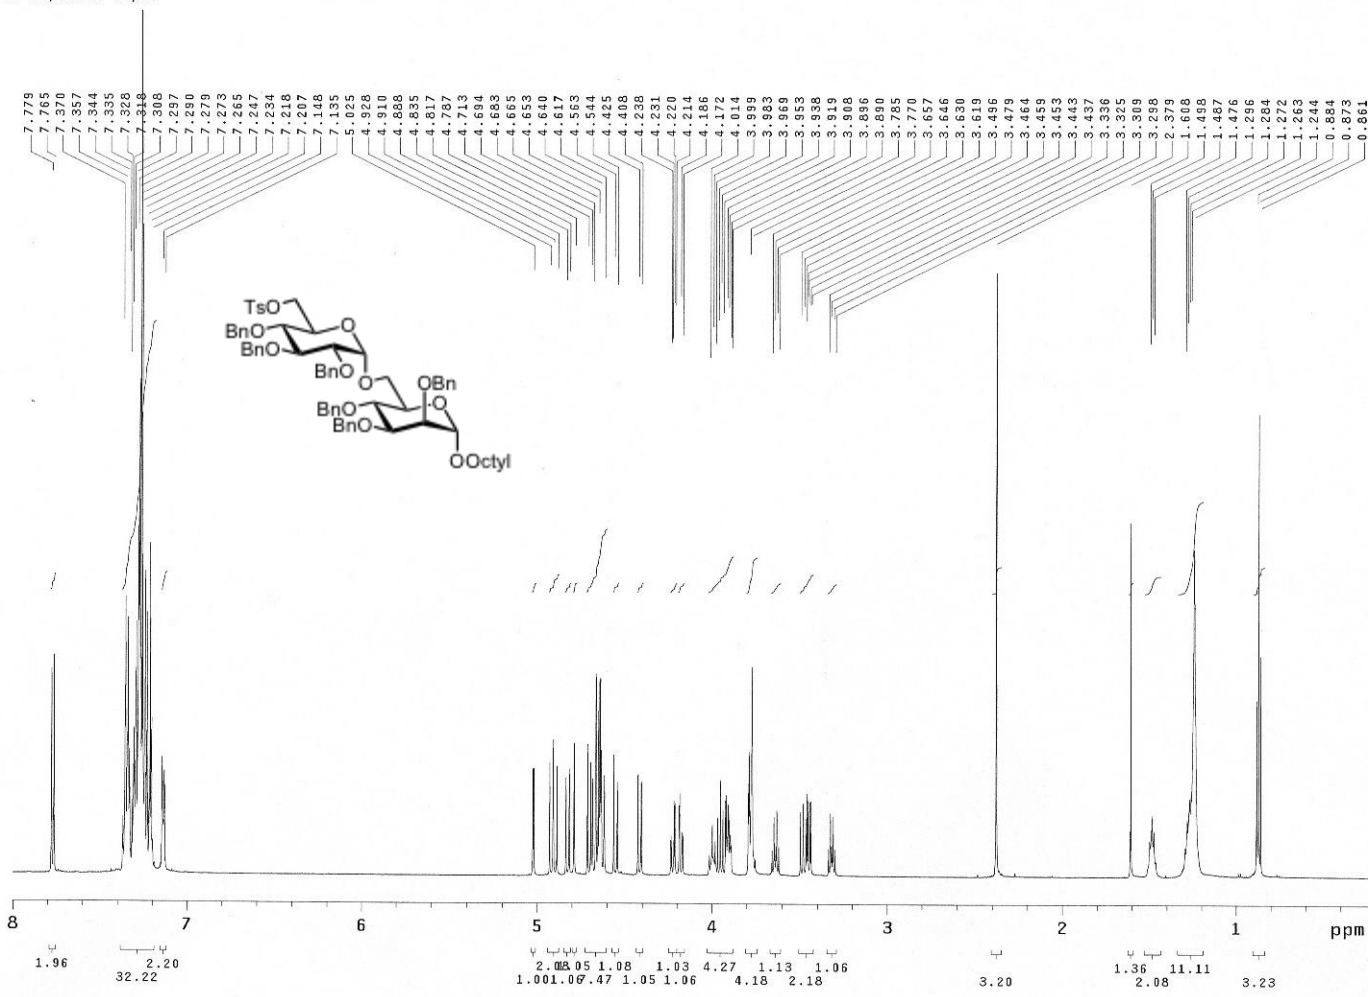

# <sup>13</sup>C NMR spectrum of **32**

pht-4-151-A  
125 MHz APT in CDCl<sub>3</sub> (ref. to CDCl<sub>3</sub> @ 77.0 ppm), temp 27.2 C -> actual temp = 27.0 C, sw probe  
C & CH<sub>2</sub> same, CH & CH<sub>3</sub> opposite side of solvent signal  
date: Jul 9 2007 sweep width: 33827Hz acq.time: 2.0s relax.time: 0.1s # scans: 760 dig.res.: 0.5 Hz/pt hz/mm:104.3  
file:/mnt/d500/home9/t11nmr/nmrdata/pht/pht-4/pht-4-151-A-APT.fid

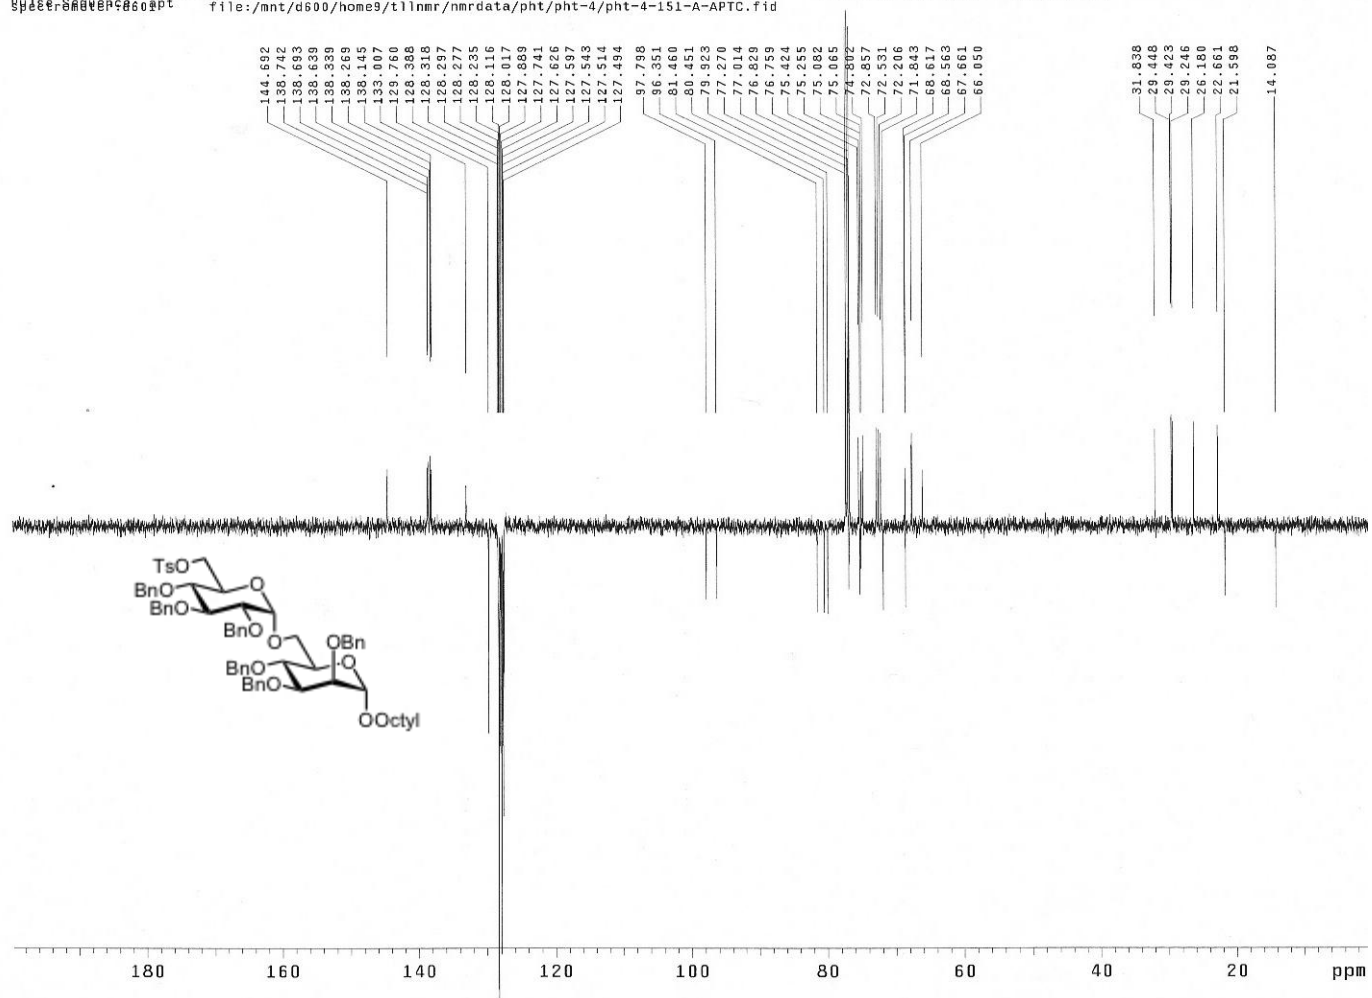

# <sup>1</sup>H NMR spectrum of **33**

pht-4-155-A  
600 MHz 1D in CDCl<sub>3</sub> (ref. to CDCl<sub>3</sub> @ 7.26 ppm), temp 28.0 C -> actual temp = 27.0 C, id600 probe  
Pulse Sequence: s2pu1

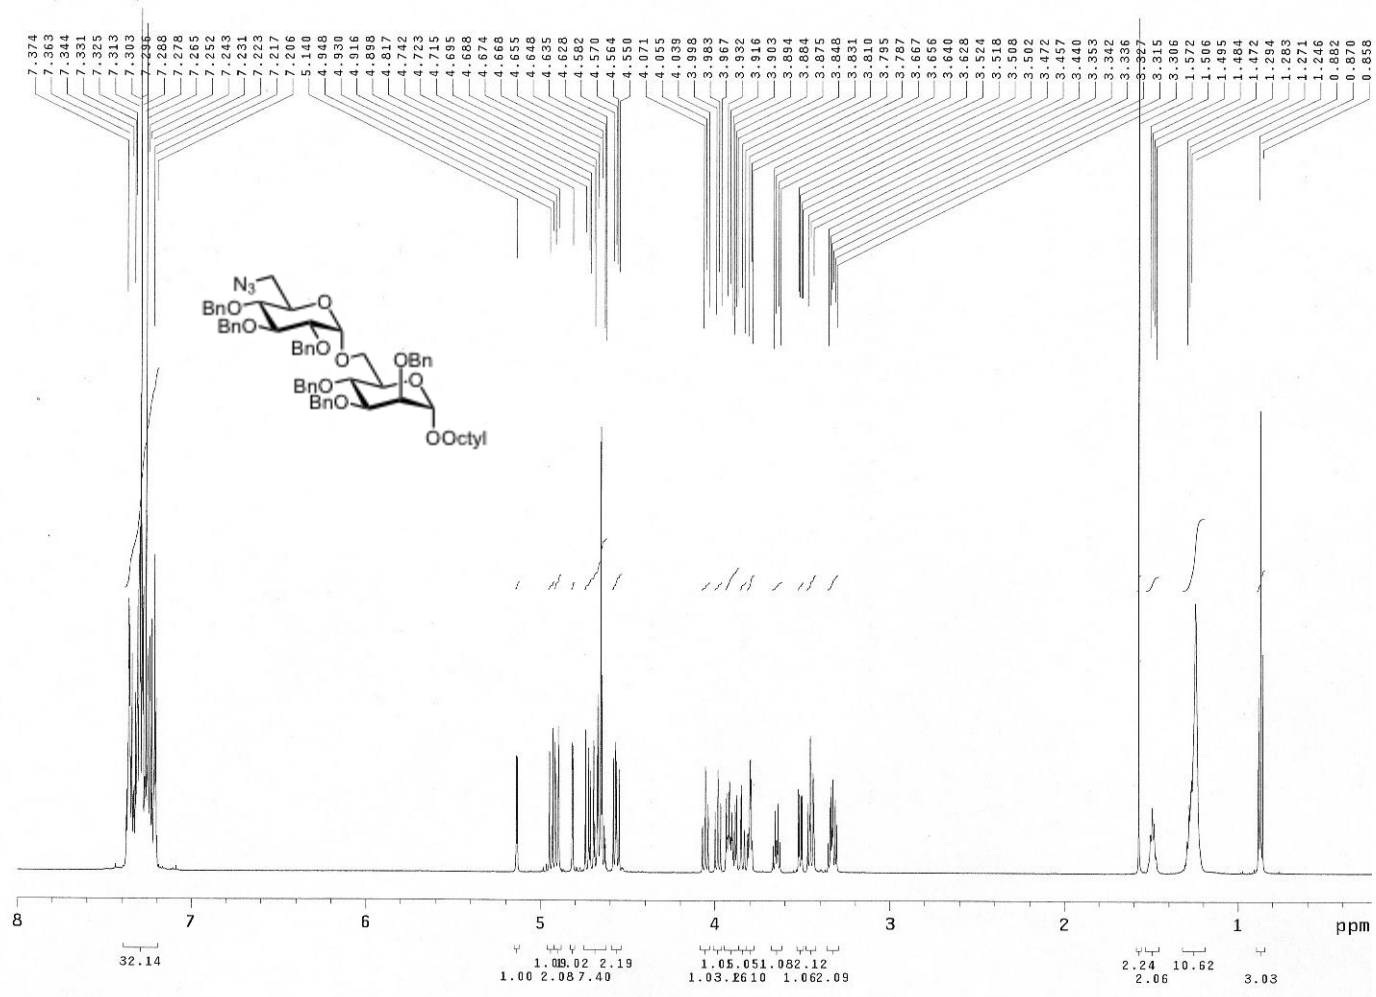

# <sup>13</sup>C NMR spectrum of **33**

pht-4-155-A  
 125 MHz APT in CDCl<sub>3</sub> (ref. to CDCl<sub>3</sub> @ 77.0 ppm), temp 27.2 C -> actual temp = 27.0 C, sw probe  
 C & CH<sub>2</sub> same, CH & CH<sub>3</sub> opposite side of solvent signal  
 date: Jul 11 2007 sweep width: 33827Hz acq.time: 2.0s relax.time: 0.1s # scans: 23304 dig.res.: 0.5 Hz/pt hz/mm:104.2  
 file:/mnt/d600/homes/t11nmr/nmrdata/pht/pht-4/2007.07.11.15\_pht-4-155-A-APT\_C13\_apt.fid

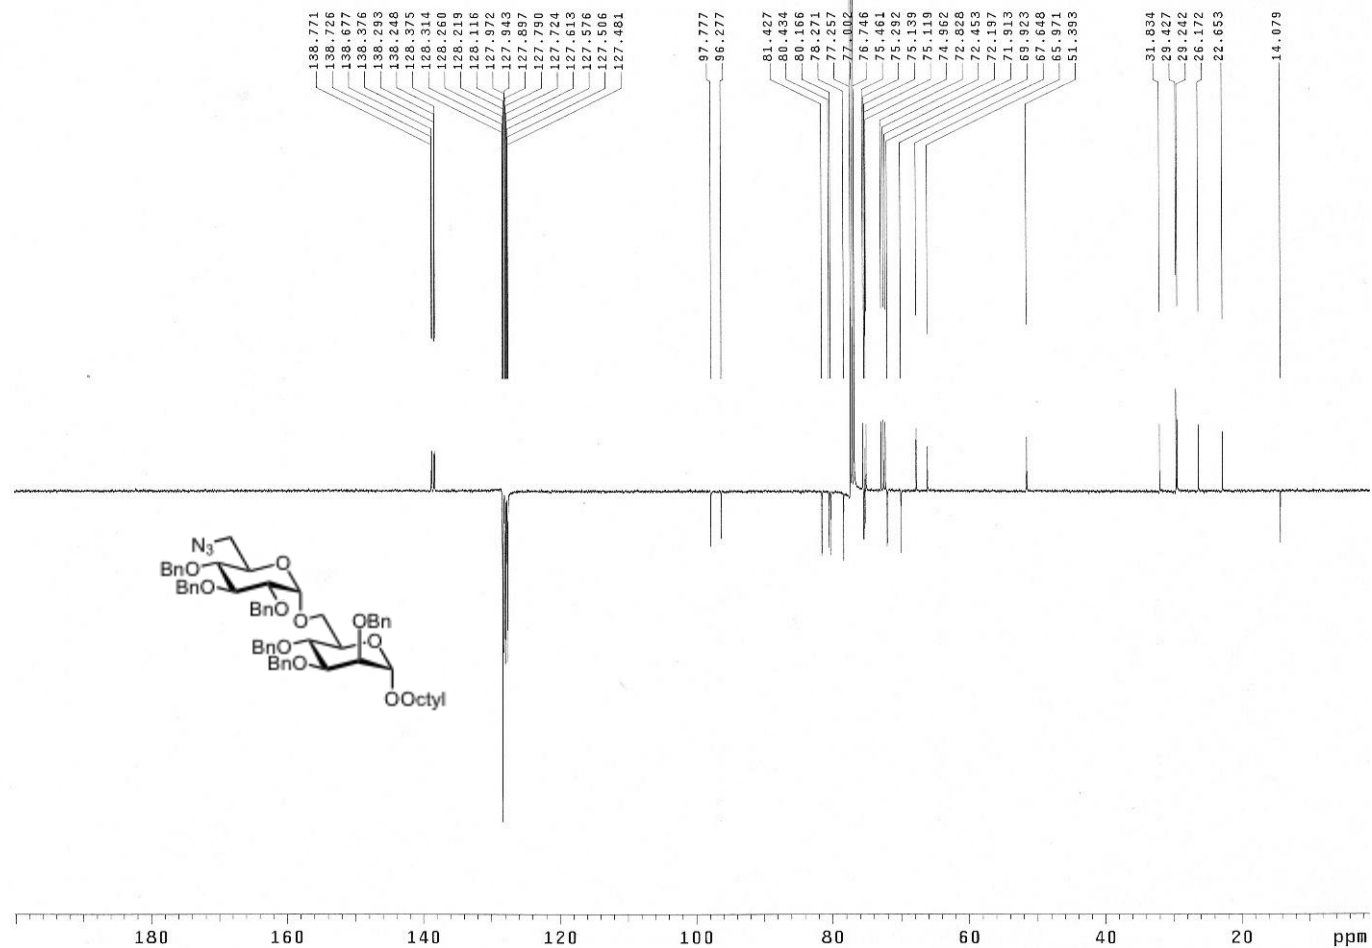

# <sup>1</sup>H NMR spectrum of **34**

pht-4-185-A  
600 MHz 1D in CD3OD (ref. to CD3OD @ 3.30 ppm), temp 28.0 C -> actual temp = 27.0 C, id600 probe  
Pulse Sequence: s2pu1

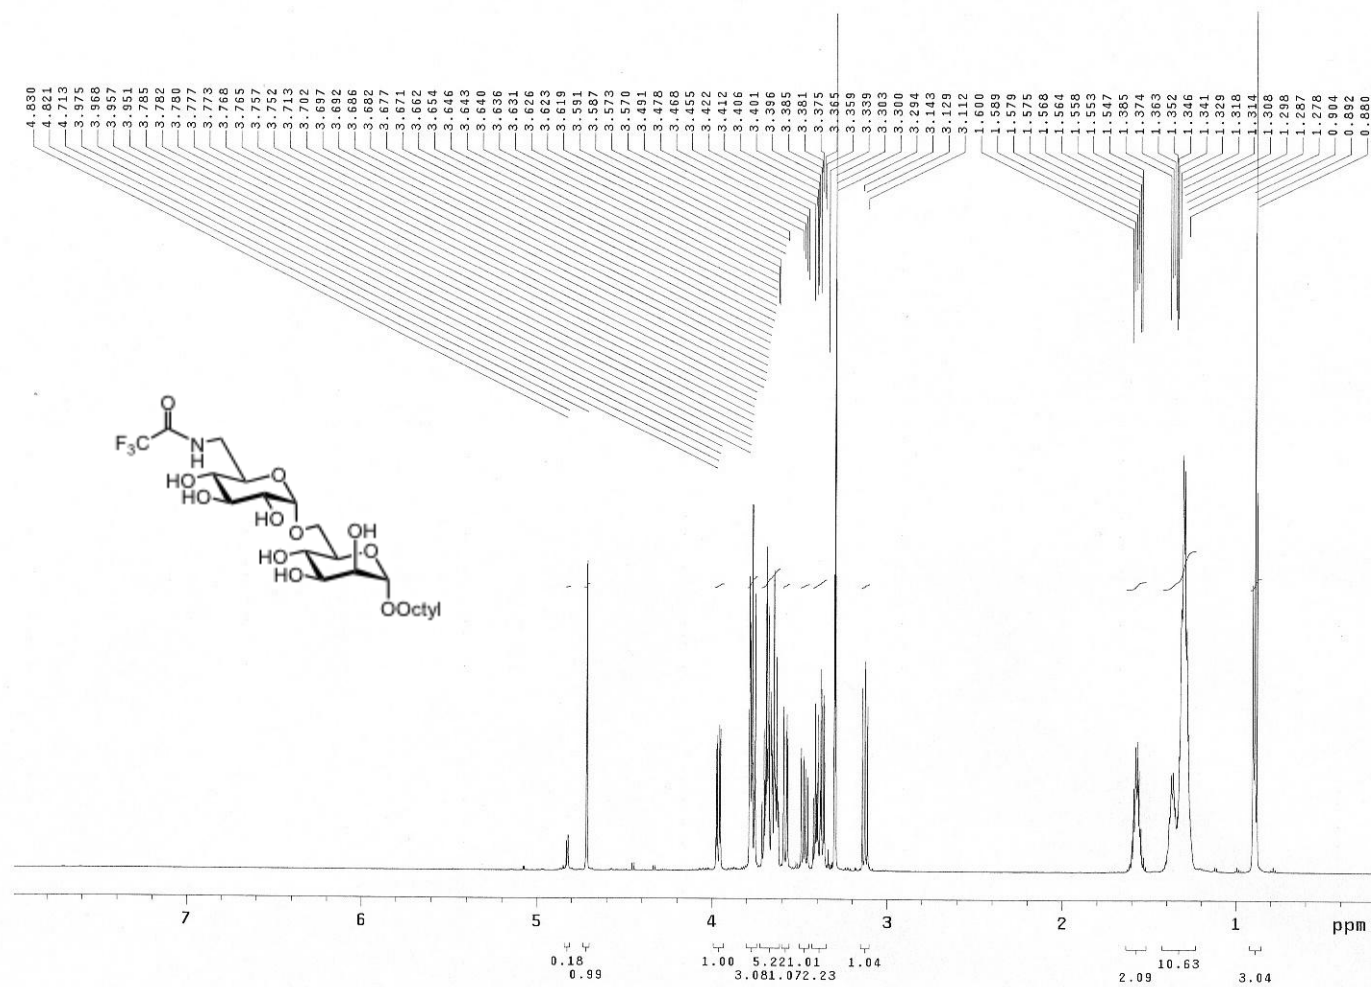

# <sup>13</sup>C NMR spectrum of **34**

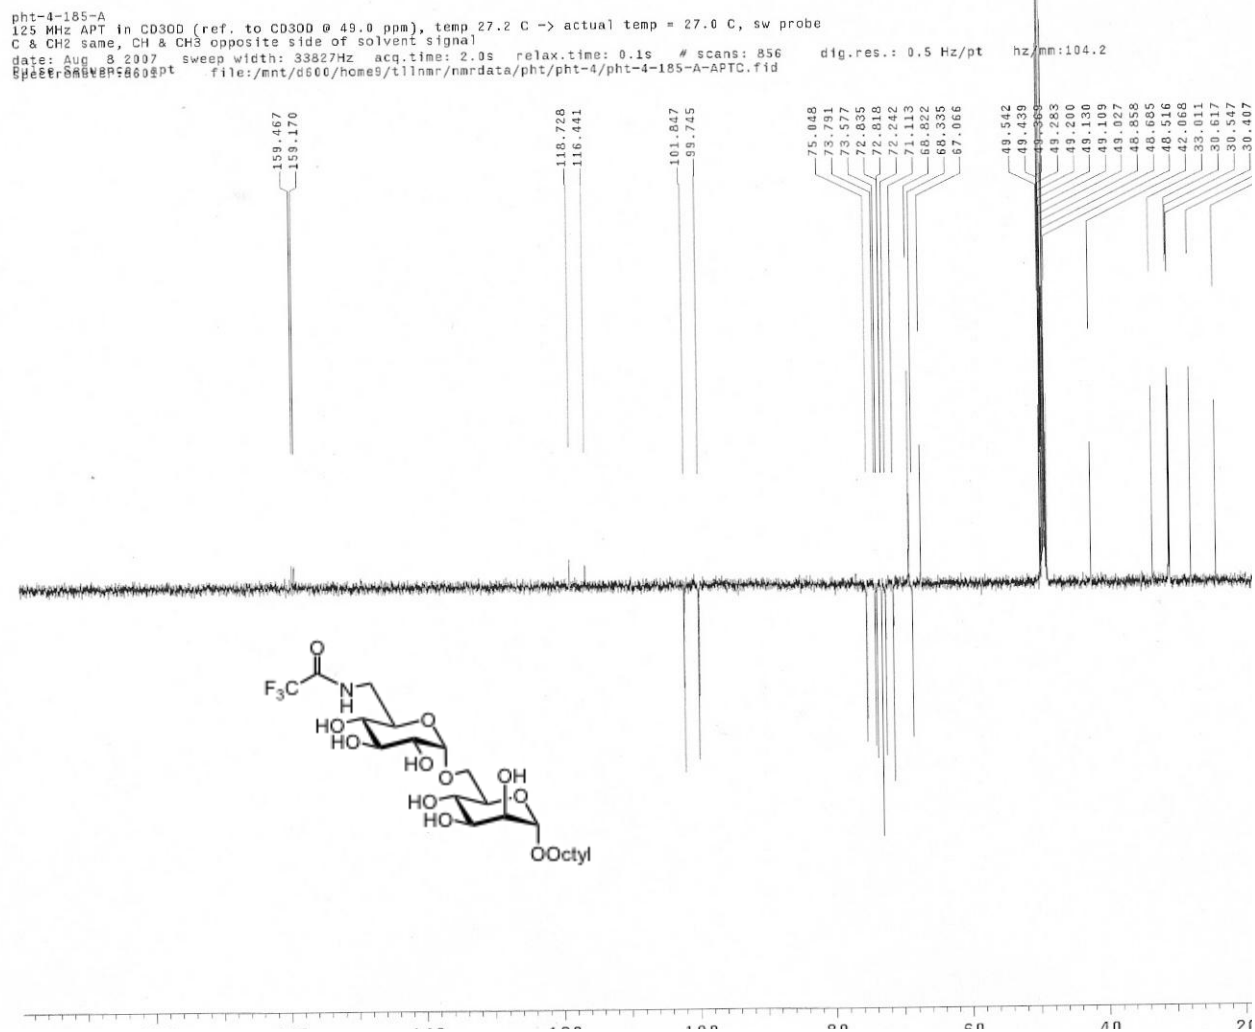



# <sup>19</sup>F NMR spectrum of **34**

pht-4-185-A  
376.132 MHz F19 1D 1n

file: pht-4-185-A-Fluorine.fid width: 78818Hz acq.time: 3.0s relax.time: 1.0s # scans: 20 dig.res.: 0.3 Hz/pt hz/mm: 250.6  
spectrometer: d601 file: /mnt/d600/home9/t11nmr/nmrdata/pht/pht-4/pht-4-185-A-Fluorine.fid  
Pulse Sequence: s2pu1

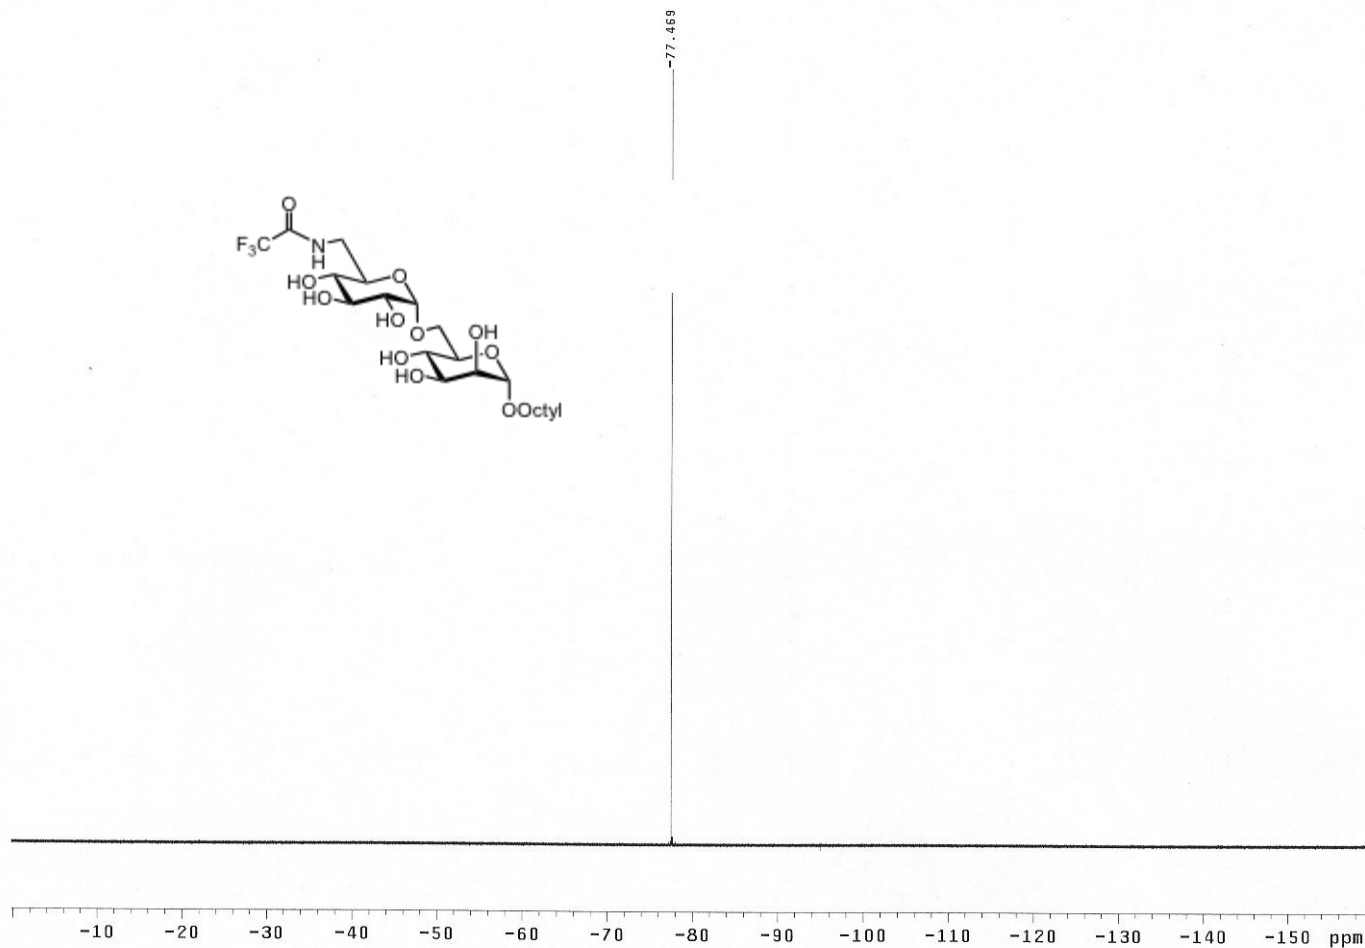

# <sup>1</sup>H NMR spectrum of **35**

pht-7-11-A  
600 MHz 1D in CDCl<sub>3</sub> (ref. to CDCl<sub>3</sub> @ 7.26 ppm), temp 28.0 C -> actual temp = 27.0 C, id600 probe  
Pulse Sequence: s2pu1

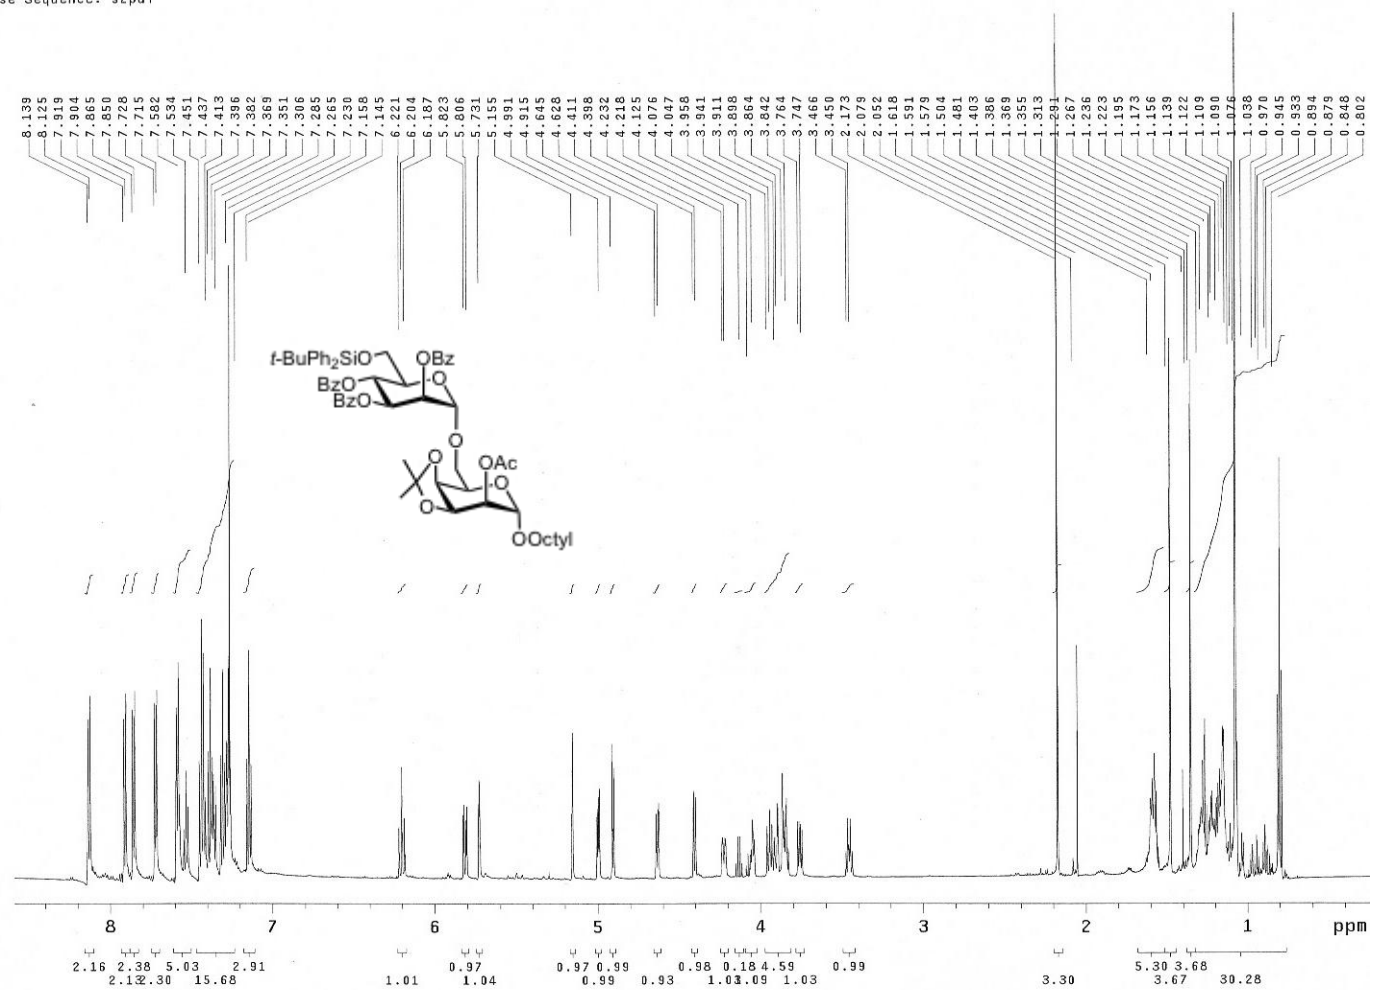

# <sup>13</sup>C NMR spectrum of **35**

pht-7-11-A  
125 MHz APT in CDCl<sub>3</sub> (ref. to CDCl<sub>3</sub> @ 77.0 ppm), temp 27.2 C -> actual temp = 27.0 C, sw probe  
C & CH<sub>2</sub> same, CH & CH<sub>3</sub> opposite side of solvent signal  
date: Aug 27 2007 sweep width: 33827Hz acq.time: 2.0s relax.time: 0.1s # scans: 504 dig.res.: 0.5 Hz/pt hz/mm:104.0  
file:/mnt/d600/home9/t1lnmr/nmrdata/pht/pht-7/pht-7-11-A-APTC.fid

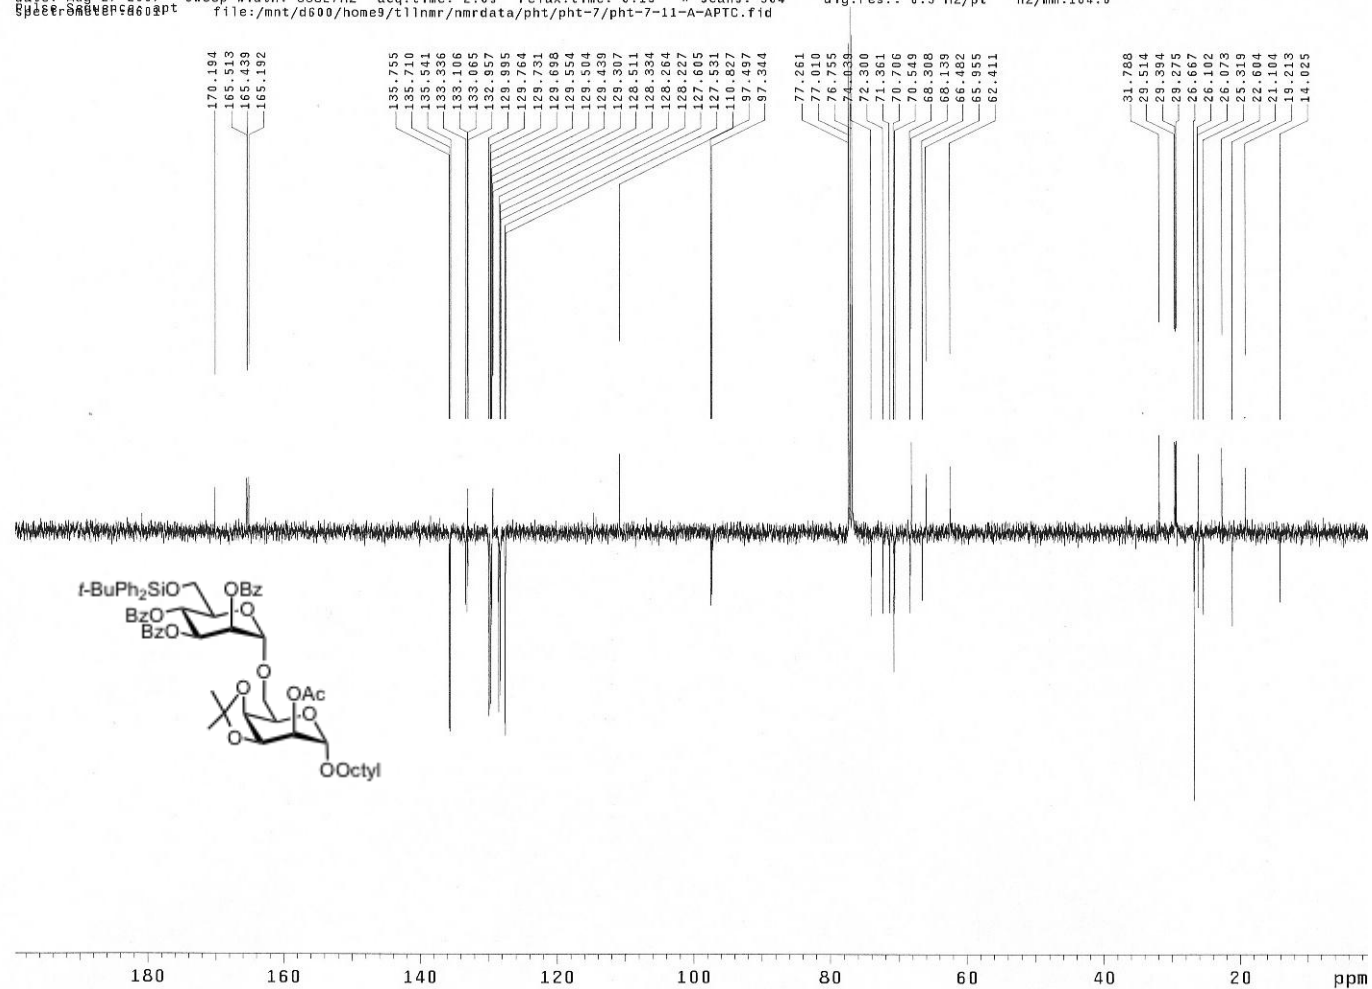

# <sup>1</sup>H NMR spectrum of **36**

pht-7-15-A  
500 MHz 1D in CDCl<sub>3</sub> (ref. to CDCl<sub>3</sub> @ 7.26 ppm), temp 27.2 C → actual temp = 27.0 C, sw500 probe

Pulse Sequence: s2pu1

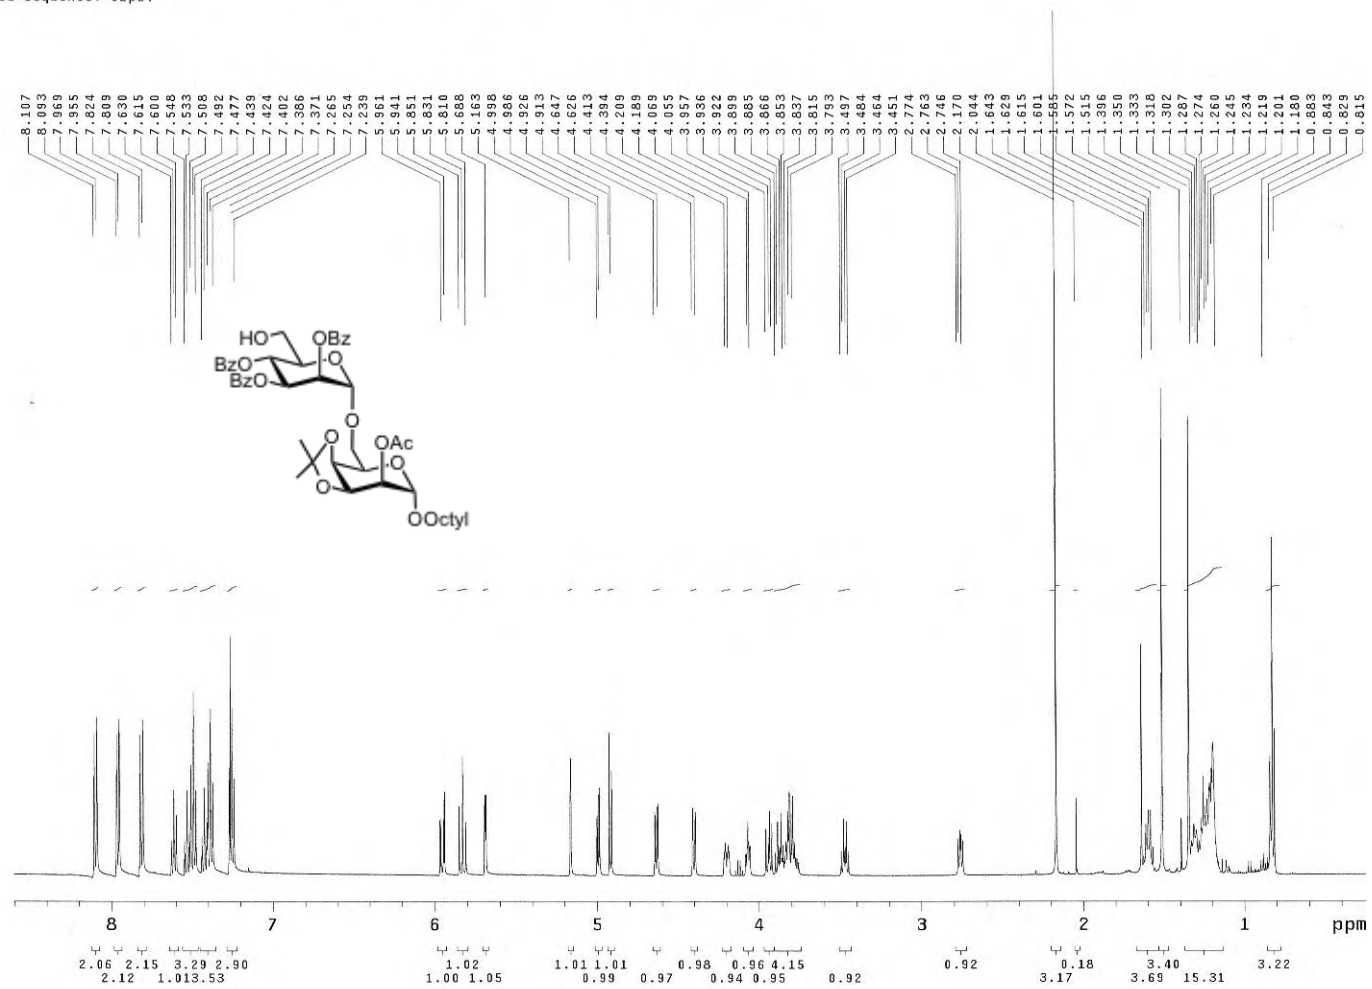

# $^{13}\text{C}$ NMR spectrum of **36**

pht-7-15-A  
125 MHz APT in CDCl<sub>3</sub> (ref. to CDCl<sub>3</sub> @ 77.0 ppm), temp 27.2 C -> actual temp = 27.0 C, sw probe  
C & CH<sub>2</sub> same, CH & CH<sub>3</sub> opposite side of solvent signal  
date: Sep 1 2007 sweep width: 33827Hz acq.time: 2.0s relax.time: 0.1s # scans: 1672 dig.res.: 0.5 Hz/pt hz/mm:104.6  
file:/mnt/d600/home9/t11nmr/nmrdata/pht/pht-7/pht-7-15-A-APT.fid

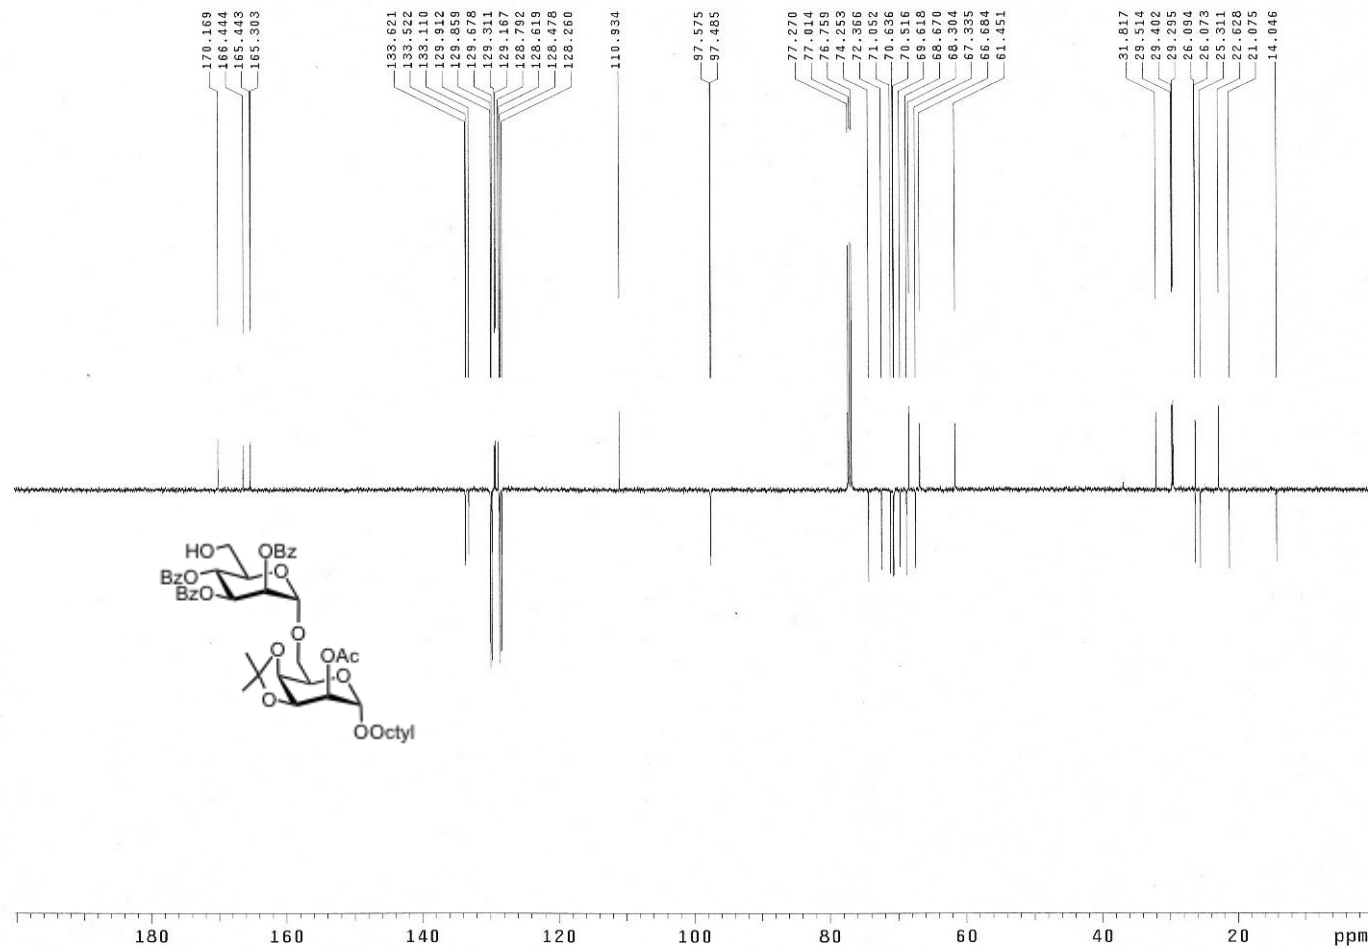

# <sup>1</sup>H NMR spectrum of **37**

pht-7-19-A  
500 MHz 1D in CDCl<sub>3</sub> (ref. to CDCl<sub>3</sub> @ 7.26 ppm), temp 27.2 C -> actual temp = 27.0 C, sw500 probe  
Pulse Sequence: s2pu1

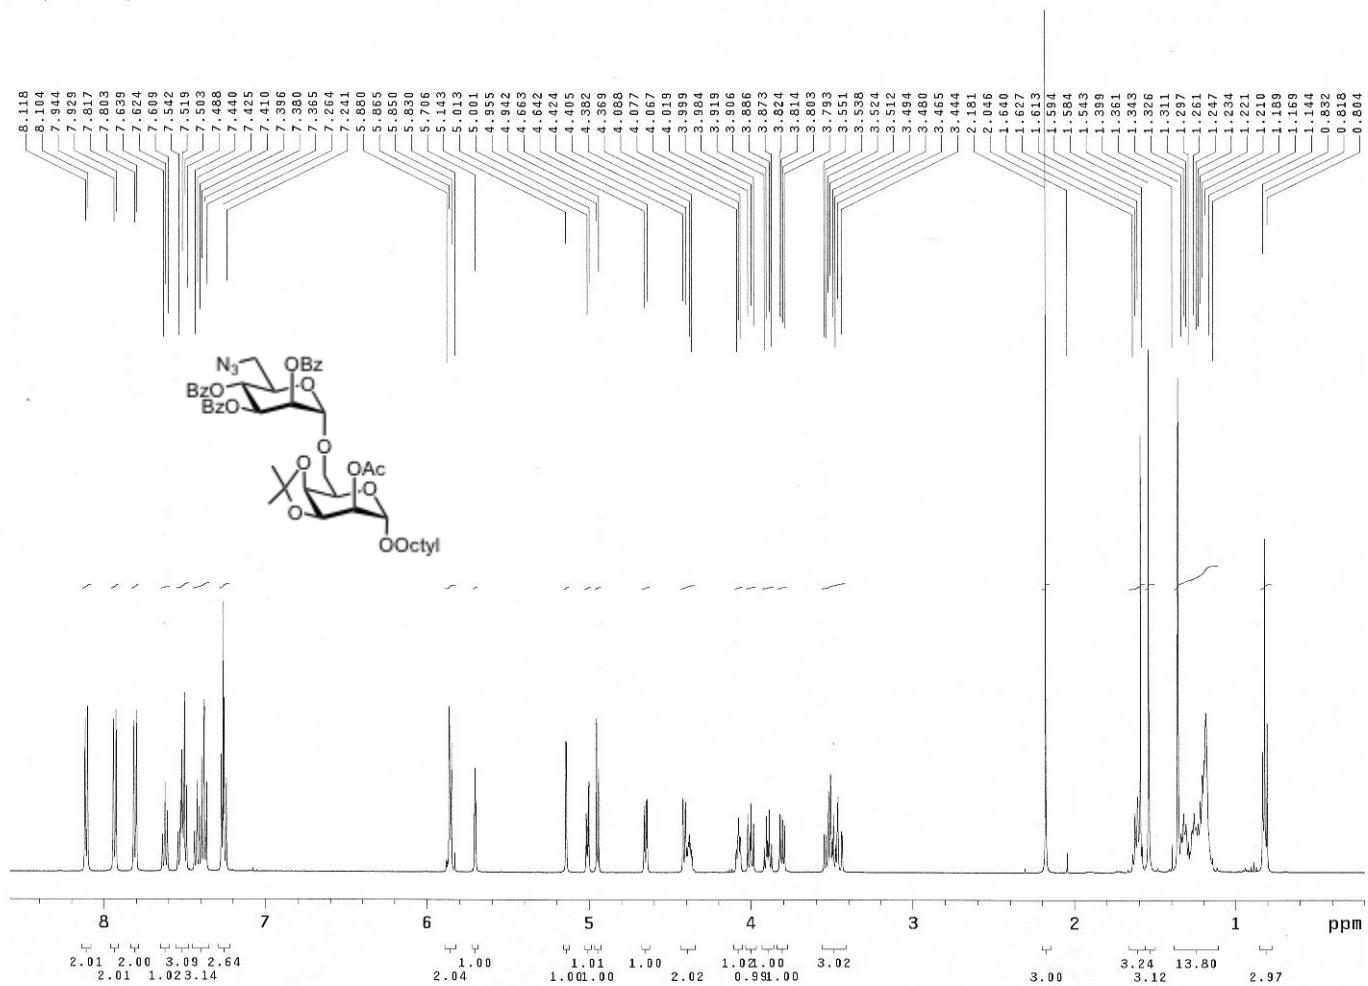

# $^{13}\text{C}$ NMR spectrum of **37**

pht-7-19-A  
125 MHz APT in CDCl<sub>3</sub> (ref. to CDCl<sub>3</sub> @ 77.0 ppm), temp 27.2 C -> actual temp = 27.0 C, sw probe  
C & CH<sub>2</sub> same, CH & CH<sub>3</sub> opposite side of solvent signal  
date: Sep 8 2007 sweep width: 33827Hz acq.time: 2.0s relax.time: 0.1s # scans: 1608 dig.res.: 0.5 Hz/pt hz/mm:104.3  
File:/mnt/d600/home9/t11nmr/nmrdata/pht/pht-7-19-A-APTC.fid

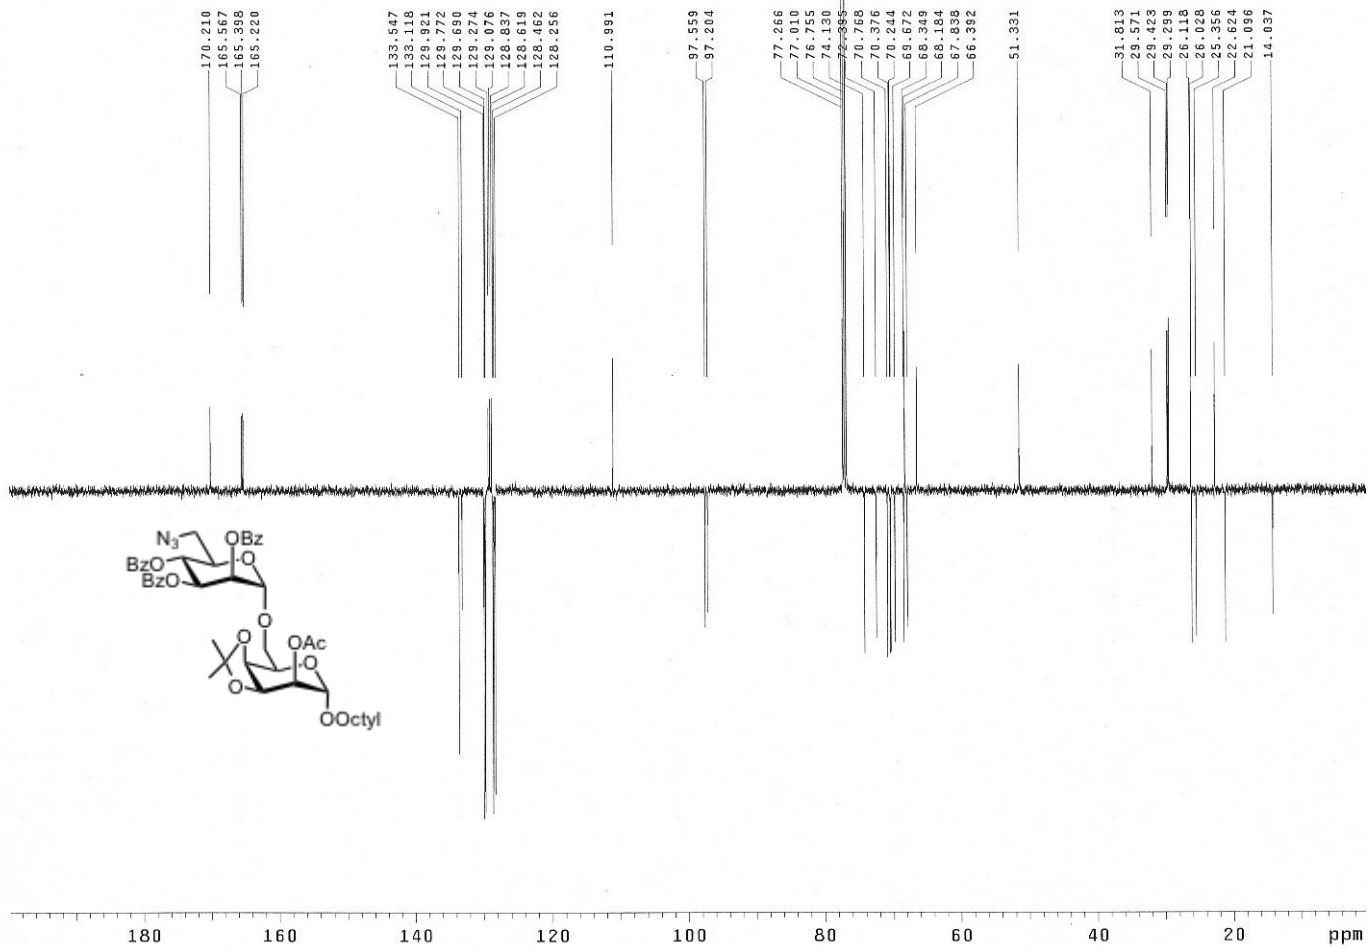

# <sup>1</sup>H NMR spectrum of **38**

500 MHz 1D in CDCl<sub>3</sub> (ref. to CDCl<sub>3</sub> @ 7.26 ppm), temp 26.1 C -> actual temp = 27.0 C, autoxdb probe  
Pulse Sequence: s2pul

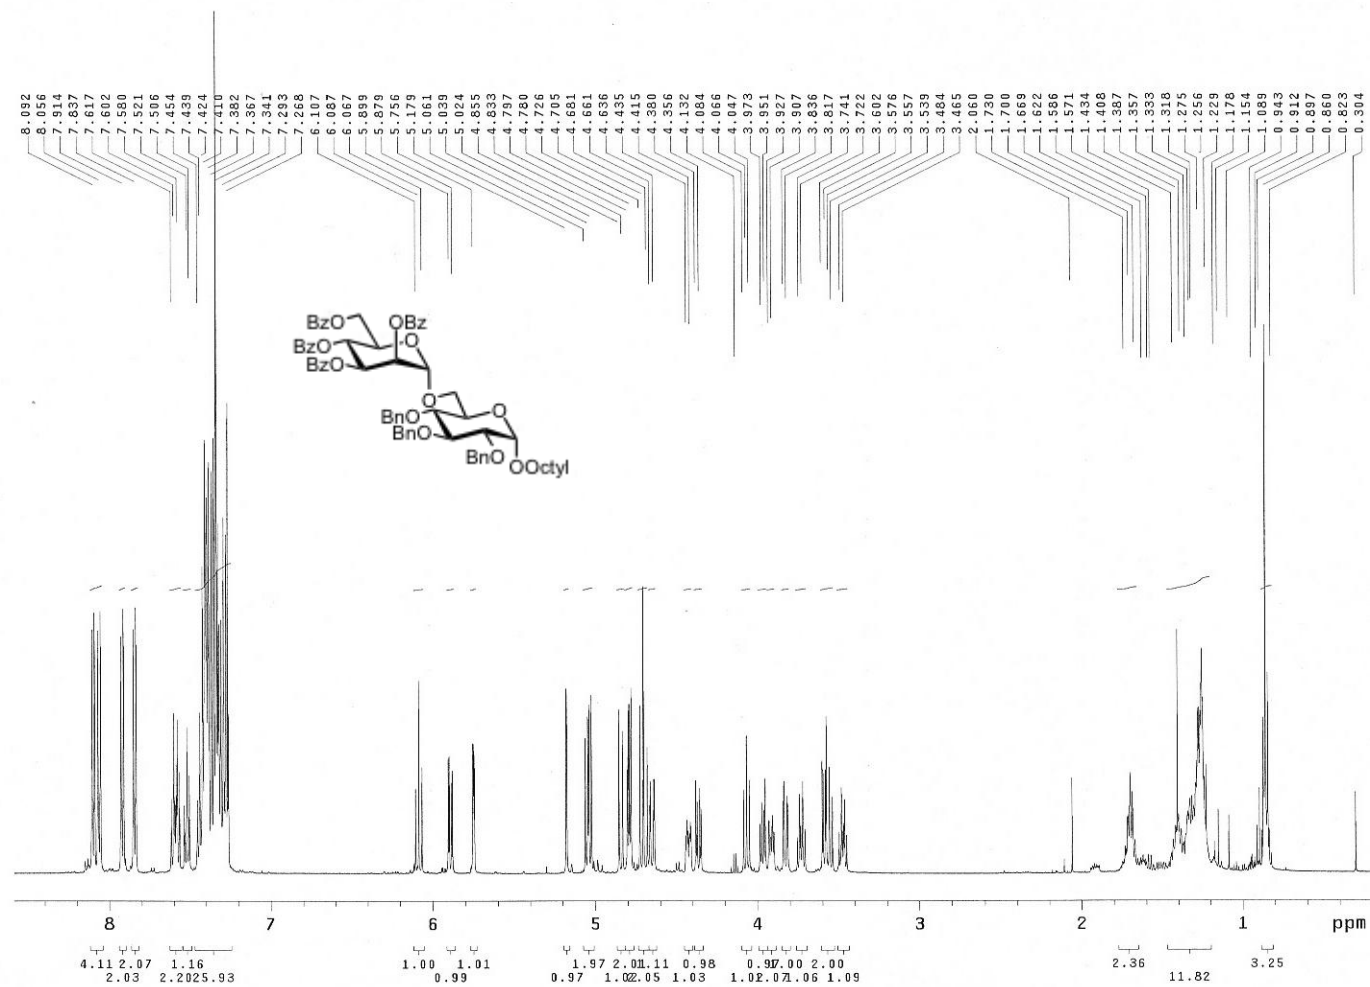



# <sup>13</sup>C NMR spectrum of **38**

7-197-A  
125 MHz APT in CDCl<sub>3</sub> (ref. to CDCl<sub>3</sub> @ 77.0 ppm), temp 26.1 C -> actual temp = 27.0 C, autoxdb probe  
C & CH<sub>2</sub> same, CH & CH<sub>3</sub> opposite side of solvent signal  
date: Mar 27 2008 sweep width: 33784Hz acq.time: 2.0s relax.time: 0.1s # scans: 232 dig.res.: 0.5 Hz/pt hz/mm:104.7  
file:/mnt/d600/home9/t11nmr/nmrdata/pht/pht-7/pht-7-197-A-APTC.fid

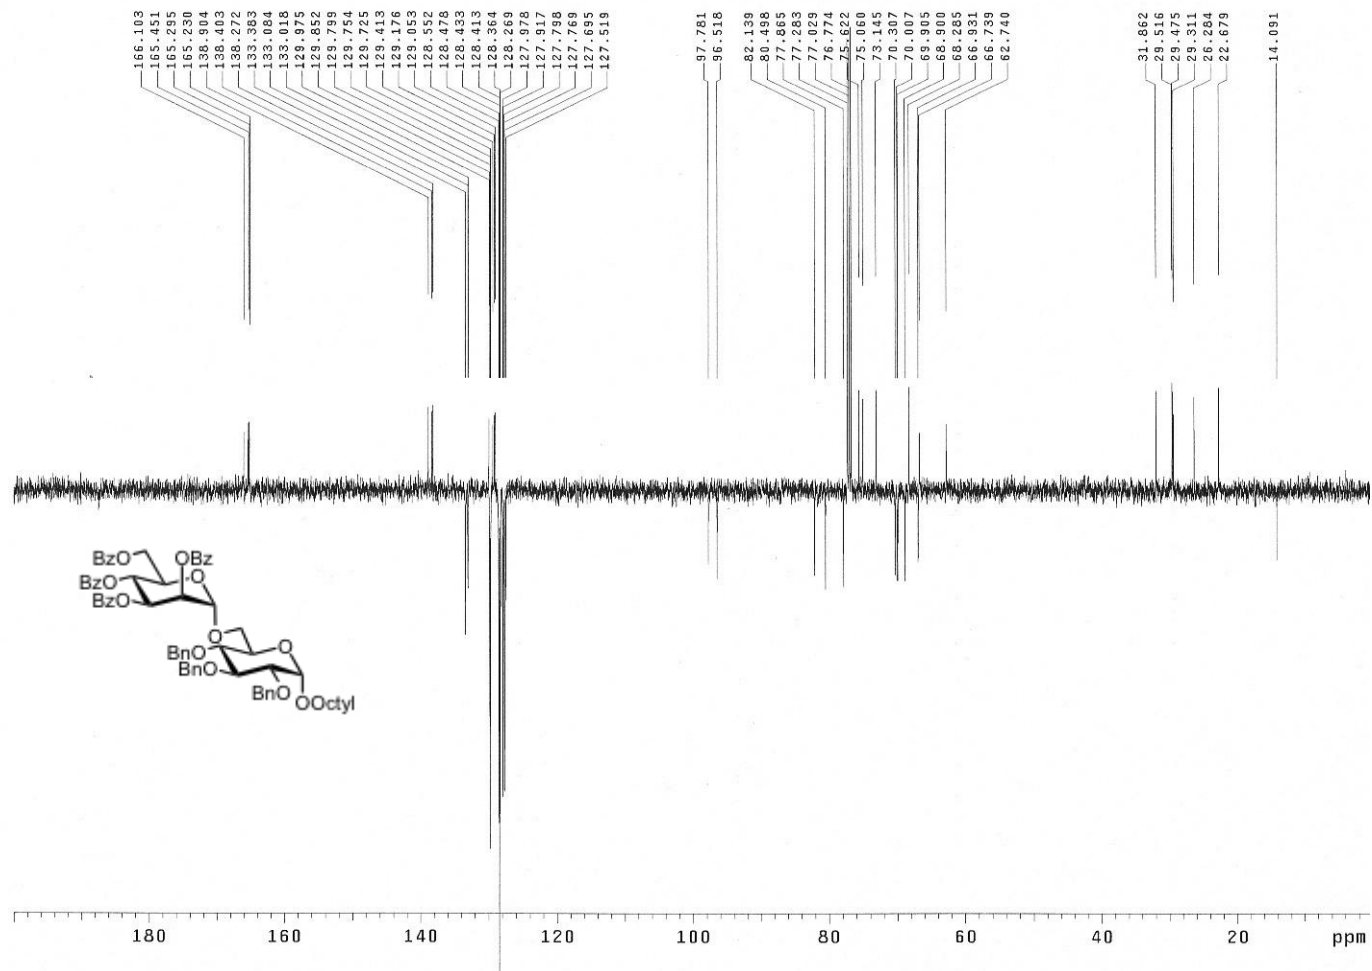

# <sup>1</sup>H NMR spectrum of **39**

pht-7-193-B  
600 MHz 1D in CDCl<sub>3</sub> (ref. to CDCl<sub>3</sub> @ 7.26 ppm), temp 28.0 C -> actual temp = 27.0 C, id600 probe  
Pulse Sequence: s2pul

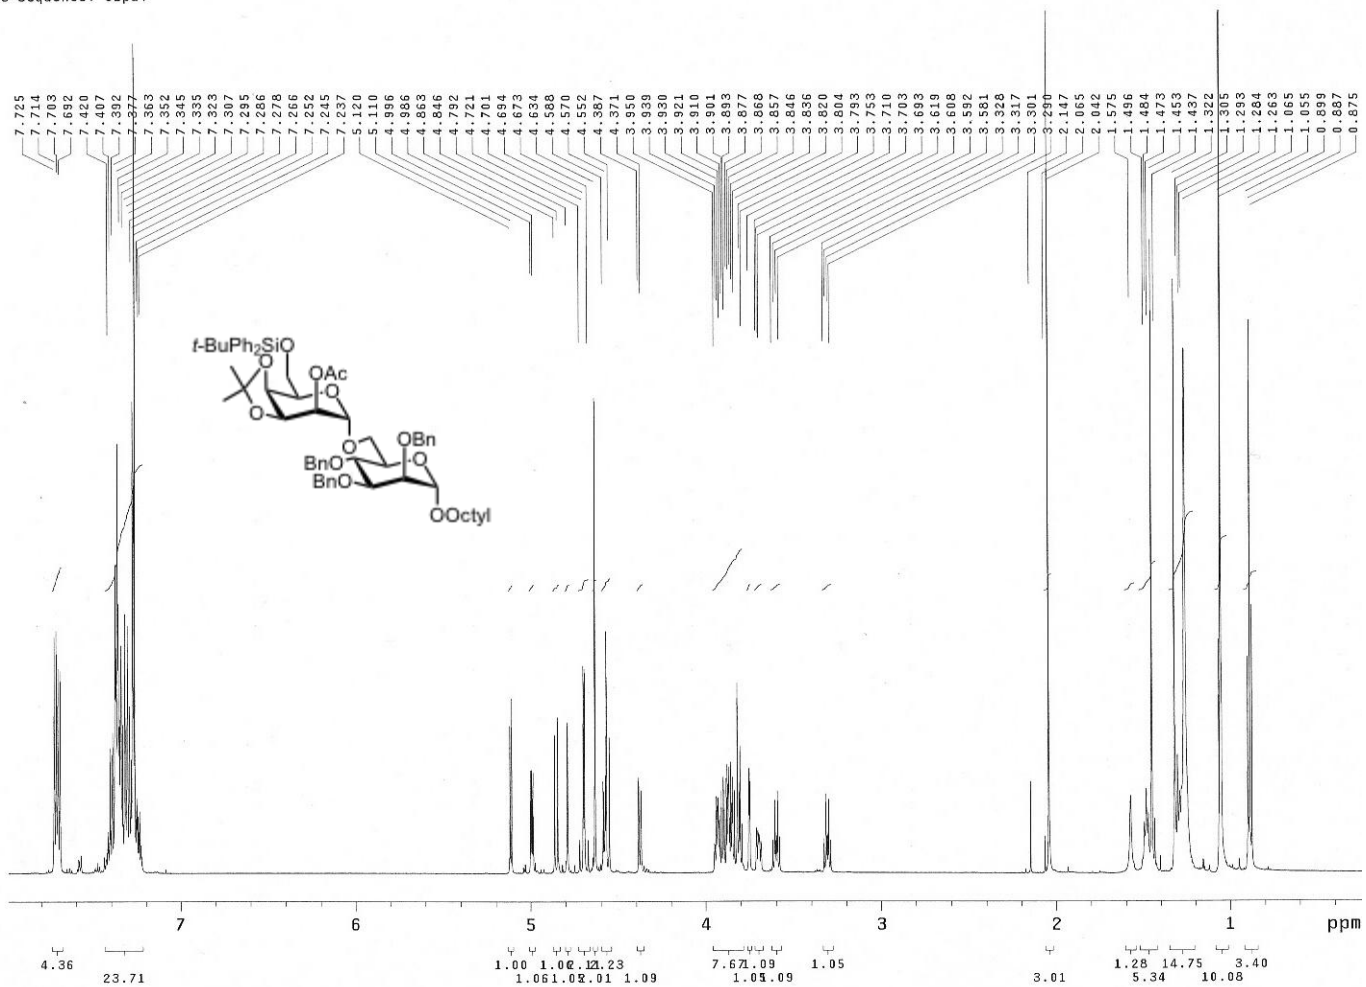

# <sup>13</sup>C NMR spectrum of **39**

pht-7-193-B  
125 MHz APT in CDCl<sub>3</sub> (ref. to CDCl<sub>3</sub> @ 77.0 ppm), temp 27.2 C -> actual temp = 27.0 C, sw probe  
C & CH<sub>2</sub> same, CH & CH<sub>3</sub> opposite side of solvent signal  
date: Mar 17 2008 sweep width: 33827Hz acq.time: 2.0s relax.time: 0.1s # scans: 984 dig.res.: 0.5 Hz/pt hz/mm:140.9  
spectrometer:ibds5 file:exp

Pulse Sequence: apt

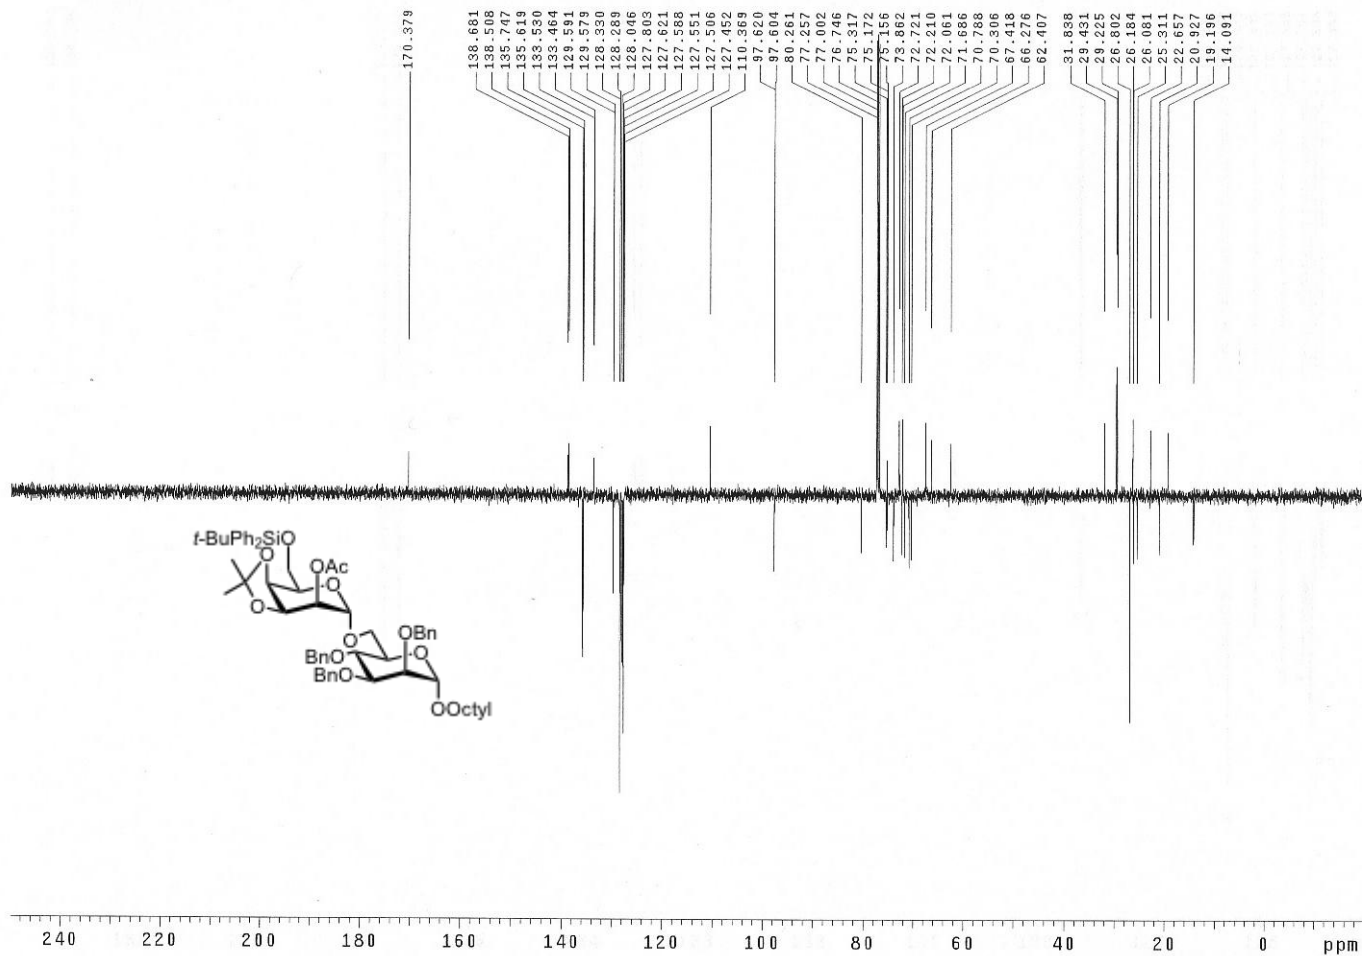

# <sup>1</sup>H NMR spectrum of 40

500 MHz 1D in CDCl<sub>3</sub> (ref. to CDC13 @ 7.26 ppm), temp 26.1 C -> actual temp = 27.0 C, autoxdb probe

Pulse Sequence: s2pu1

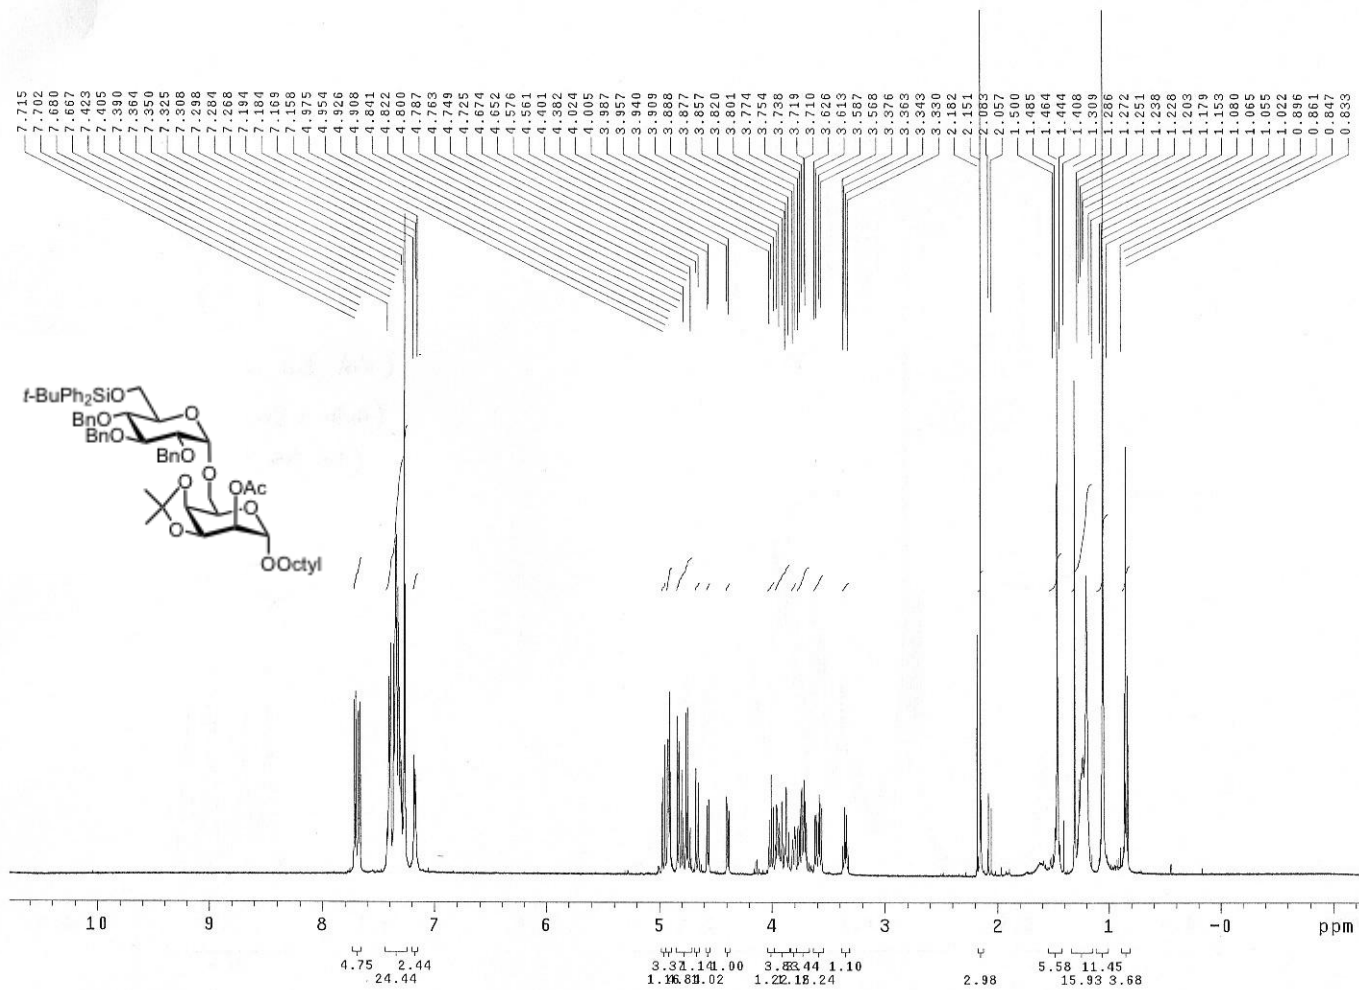

# <sup>13</sup>C NMR spectrum of **40**

pht-7-201-B  
125 MHz APT in CDCl<sub>3</sub> (ref. to CDC13 @ 77.0 ppm), temp 26.1 C -> actual temp = 27.0 C, autotdb probe  
C & CH<sub>2</sub> same, CH & CH<sub>3</sub> opposite side of solvent signal  
date: Apr 3 2008 sweep width: 33784Hz acq.time: 2.0s relax.time: 0.1s # scans: 400 dig.res.: 0.5 Hz/pt hz/mm:140.8  
file:exp

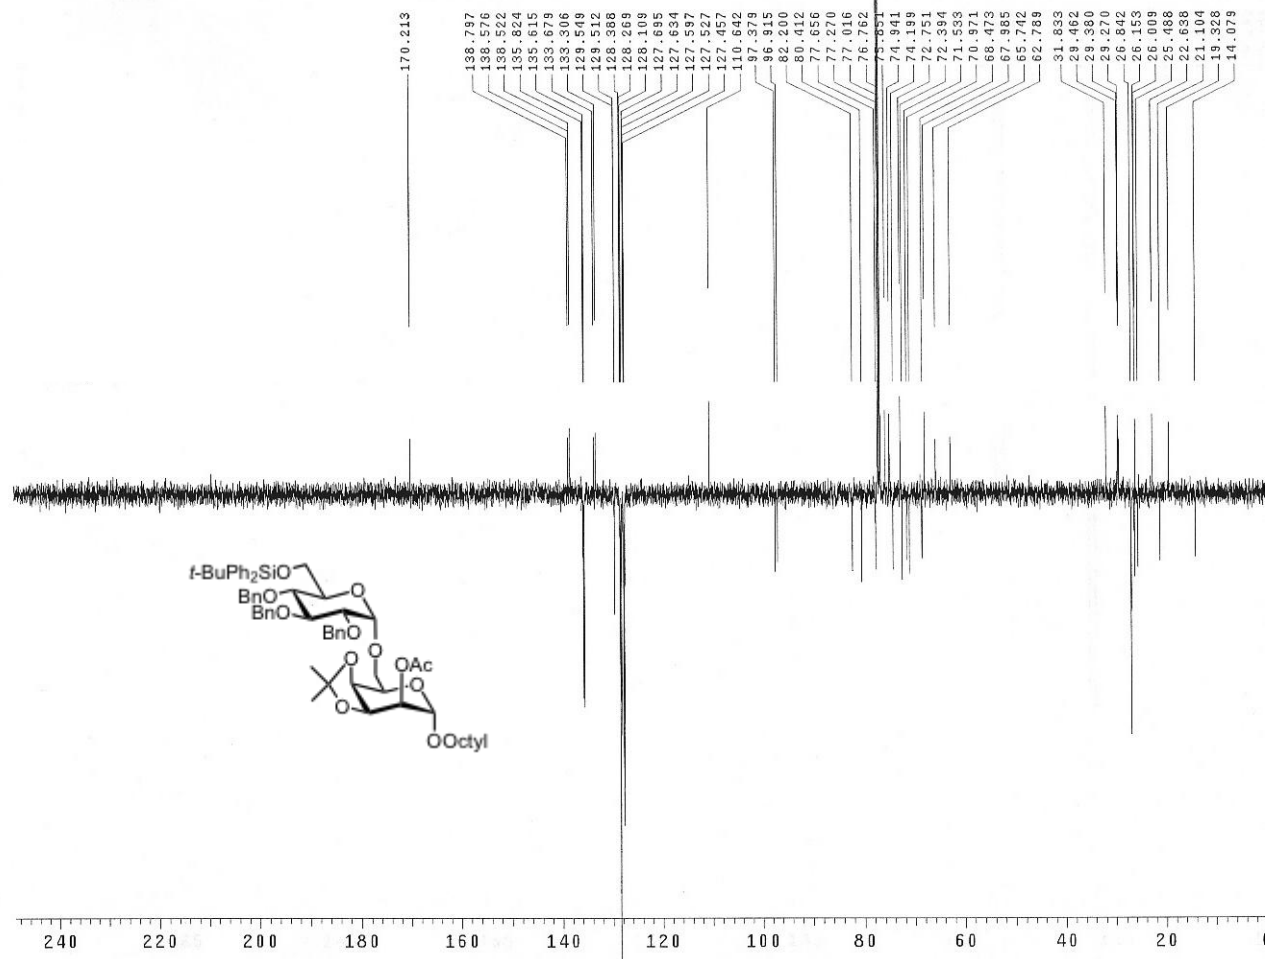

Supplement: b916580k.pdf [file b916580k.pdf]
